# Supplementary material for: Pharmacist-led management of chronic pain in primary care: results from a randomised controlled exploratory trial
Source: PubMed Central journal article supplement — BMJ Open. 2013 Apr 5;3(4):e002361. doi: 10.1136/bmjopen-2012-002361 (PMC3641445; doi:10.1136/bmjopen-2012-002361), 2013-04-05
Supplement: bmjopen-2012-002361.draft_revisions.pdf [file bmjopen-2012-002361.draft_revisions.pdf]

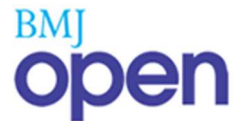

**Pharmacist-led management of chronic pain in primary care: results from a randomised controlled exploratory trial**

|                                 |                                                                                                                                                                                                                                                                                                                                                                                                                                                                                                                                                                                                                                                               |
|---------------------------------|---------------------------------------------------------------------------------------------------------------------------------------------------------------------------------------------------------------------------------------------------------------------------------------------------------------------------------------------------------------------------------------------------------------------------------------------------------------------------------------------------------------------------------------------------------------------------------------------------------------------------------------------------------------|
| Journal:                        | <i>BMJ Open</i>                                                                                                                                                                                                                                                                                                                                                                                                                                                                                                                                                                                                                                               |
| Manuscript ID:                  | bmjopen-2012-002361                                                                                                                                                                                                                                                                                                                                                                                                                                                                                                                                                                                                                                           |
| Article Type:                   | Research                                                                                                                                                                                                                                                                                                                                                                                                                                                                                                                                                                                                                                                      |
| Date Submitted by the Author:   | 16-Nov-2012                                                                                                                                                                                                                                                                                                                                                                                                                                                                                                                                                                                                                                                   |
| Complete List of Authors:       | Bruhn, Hanne; University of Aberdeen, Health Services Research Unit<br>Bond, Christine; University of Aberdeen,<br>Elliott, Alison; University of Aberdeen, General Practice and Primary Care<br>Hannaford, Phil; University of Aberdeen<br>Lee, Amanda; University of Aberdeen, Division of Applied Health Sciences<br>McNamee, Paul; University of Aberdeen<br>Smith, Blair; University of Dundee,<br>Watson, Margaret; University of Aberdeen, General Practice and Primary Care<br>Blyth, Annie; University of East Anglia, Norwich Medical School<br>Wright, David; University of East Anglia, Infection<br>Holland, Richard; University of East Anglia, |
| <b>Primary Subject Heading</b>: | General practice / Family practice                                                                                                                                                                                                                                                                                                                                                                                                                                                                                                                                                                                                                            |
| Secondary Subject Heading:      | General practice / Family practice, Health services research                                                                                                                                                                                                                                                                                                                                                                                                                                                                                                                                                                                                  |
| Keywords:                       | PAIN MANAGEMENT, PRIMARY CARE, Clinical trials < THERAPEUTICS                                                                                                                                                                                                                                                                                                                                                                                                                                                                                                                                                                                                 |
|                                 |                                                                                                                                                                                                                                                                                                                                                                                                                                                                                                                                                                                                                                                               |

SCHOLARONE™  
Manuscripts

only

## Title page

Pharmacist-led management of chronic pain in primary care: results from a randomised controlled exploratory trial

Hanne Bruhn, Christine M Bond, Alison M Elliott, Philip C Hannaford, Amanda J Lee, Paul McNamee, Blair H Smith, Margaret C Watson, Annie Blyth, Richard Holland, David Wright

Centre for Healthcare Randomised Trials, Health Services Research Unit, University of Aberdeen, 3<sup>rd</sup> floor Health Sciences Building, Foresterhill, Aberdeen, AB25 2ZD, UK Hanne Bruhn, Trial Manager

Centre of Academic Primary Care, Division of Applied Health Sciences, University of Aberdeen, Polwarth West Block, Foresterhill, Aberdeen, AB25 2ZD, UK, Christine M Bond, Professor of Primary Care: Pharmacy

Centre of Academic Primary Care, Division of Applied Health Sciences, University of Aberdeen, Polwarth West Block, Foresterhill, Aberdeen, AB25 2ZD, UK, Alison M Elliott, Senior Research Fellow

Centre of Academic Primary Care, Division of Applied Health Sciences, University of Aberdeen, Polwarth West Block, Foresterhill, Aberdeen, AB25 2ZD, UK, Philip C Hannaford, NHS Grampian Chair of Primary Care

Population Health, 1st floor, Polwarth Building, Foresterhill, Aberdeen, AB25 2ZD, UK, Amanda J Lee, Professor of Medical Statistics

Health Economics Research Unit, University of Aberdeen, Polwarth Building, Foresterhill, Aberdeen, AB25 2ZD, UK, Paul McNamee, Reader

Mackenzie Building, Kirsty Semple Way, Ninewells Hospital and Medical School, Dundee, DD2 4RB, UK, Blair H Smith, Professor of Population Science

Centre of Academic Primary Care, Division of Applied Health Sciences, University of Aberdeen, Polwarth West Block, Foresterhill, Aberdeen, AB25 2ZD, UK, Margaret C Watson, Senior Research Fellow

Norwich Medical School, Faculty of Medicine and Health Sciences, University of East Anglia, Norwich Research Park, Norwich, NR4 7TJ, UK, Annie Blyth, Research Associate

Norwich Medical School, Faculty of Medicine and Health Sciences, University of East Anglia, Norwich Research Park, Norwich, NR4 7TJ, UK, Richard Holland, Professor of Public Health Medicine

School of Pharmacy, University of East Anglia, Norwich Research Park, NR4 7TJ, UK, David Wright, Chair in Pharmacy Practice

1  
2 Correspondence to: Professor CM Bond c.m.bond@abdn.ac.uk, Centre of Academic Primary  
3 Care, Division of Applied Health Sciences, University of Aberdeen, Polwarth West Block,  
4 Foresterhill, Aberdeen, AB25 2ZD, UK  
5

6  
7 The Corresponding Author has the right to grant on behalf of all authors and does grant on behalf of all  
8 authors, [a worldwide licence](#) to the Publishers and its licensees in perpetuity, in all forms, formats and  
9 media (whether known now or created in the future), to i) publish, reproduce, distribute, display and  
10 store the Contribution, ii) translate the Contribution into other languages, create adaptations, reprints,  
11 include within collections and create summaries, extracts and/or, abstracts of the Contribution, iii)  
12 create any other derivative work(s) based on the Contribution, iv) to exploit all subsidiary rights in the  
13 Contribution, v) the inclusion of electronic links from the Contribution to third party material where-  
14 ever it may be located; and, vi) licence any third party to do any or all of the above.  
15  
16  
17  
18  
19  
20  
21  
22  
23  
24  
25  
26  
27  
28  
29  
30  
31  
32  
33  
34  
35  
36  
37  
38  
39  
40  
41  
42  
43  
44  
45  
46  
47  
48  
49  
50  
51  
52  
53  
54  
55  
56  
57  
58  
59  
60

## Abstract

### Objectives

To compare the effectiveness of pharmacist medication-review, with or without prescribing, with standard care, for patients with chronic pain.

### Design

An exploratory randomised controlled trial.

### Setting

Six general practices with prescribing pharmacists in Grampian (3) and East Anglia (3).

### Participants

Patients on repeat prescribed pain medication (4815) were screened by GPs, and mailed invitations (1397). 196 were randomised and 180 (92%) completed. Exclusion criteria included: severe mental illness, terminally ill, cancer related pain, history of addiction

### Randomisation and intervention

Patients were randomised using a remote telephone service to: (i) pharmacist medication-review with face-to-face pharmacist prescribing; or (ii) pharmacist medication-review with feedback to GP and no planned patient contact; or (iii) treatment as usual (TAU). Blinding was not possible.

### Outcome measures

Primary outcomes were the Chronic Pain Grade (CPG) and the SF-12v2, together with Hospital Anxiety and Depression Scale (HADS). Outcomes were collected at 0, 3, and 6 months. Ethical approval was obtained.

### Results

In the prescribing arm (n=70) two patients were excluded/nine withdrew. In the review arm (n=63) one was excluded/three withdrew. In the TAU arm (n=63) four withdrew. Compared with baseline, patients had an improved CPG in the prescribing arm, 47.7% (21/44; p=0.003), and in the review arm, 38.6% (17/44; p=0.001), but not the TAU group, 31.3% (15/48; ns). The SF-12 PCS showed no effect in the prescribing or review arms but improvement in TAU

(p=0.02). The SF-12 MCS showed no effect for the prescribing or review arms and deterioration in the TAU arm (p=0.002). HADS scores improved within the prescribing arm for Depression (p=0.022) and Anxiety (p=0.007), between groups (p=0.022 and p=0.045 respectively)

#### Conclusion

This is the first RCT of pharmacist-prescribing in the UK, and suggests a benefit for patients with chronic pain. A larger trial is required.

Trial registration: [www.isrctn.org/ISRCTN06131530](http://www.isrctn.org/ISRCTN06131530). Medical Research Council funding.

#### *Focus:*

- Chronic pain, (lasting >3 months) affects up to half the adult population, most of whom are primarily managed in primary care but prescribing is often sub-optimal.
- Pharmacists now have prescribing rights but no published research has compared the effectiveness of their prescribing with that of GPs.
- The hypothesis was that pharmacist advice (with or without pharmacist prescribing) would lead to better outcomes than usual care

#### *Key messages:*

- The findings suggest improved pain related outcomes for patients receiving pain related care from a pharmacist prescriber
- A larger trial is called for.

#### *Strengths and Limitations*

- This the first randomised controlled trial of pharmacist prescribing in the UK looking at patient reported clinical outcomes
- The study was designed as an exploratory trial so no power calculation was done

## Introduction

Chronic pain (pain lasting more than three months) affects up to half the adult United Kingdom (UK) population, and is considered severely limiting in about 15% of cases (1). Recovery is uncommon with nearly 80% of those identified with chronic pain at baseline still reporting chronic pain four years later (2). It adversely affects many aspects of a person's physical and psychological health, and social and economic well being (3-6).

In the UK, most patients with chronic pain present, and are managed, in primary care (7). Although non-pharmacological treatments are available, these are accessed by few patients, with mixed success (e.g. (8-10)). Analgesics prescribed in primary care remain the mainstay of treatment (4), representing substantial workload and cost. Sub-optimal prescribing may lead to poor pain control and other adverse patient outcomes. One study found that the most common medications involved in adverse drug reaction-related emergency admissions involved non-steroidal anti-inflammatory drugs (NSAIDs) (11). Improved prescribing could result in better outcomes and remove the need for more costly, scarce, alternatives.

Pharmacists working in UK general practices are well-placed to improve pain pharmacotherapy because of their expertise in therapeutics, understanding of the poly-pharmacy regimens (12) frequently used in chronic pain management, and established relationships with other primary care colleagues. In the UK National Health Service (NHS), recent regulatory changes now allow accredited pharmacists (as well as some other health care professionals such as nurses) to prescribe prescription-only medicines (POMs) (13).

However, despite the increasing number of non-medical prescribers, including pharmacists, there has been no rigorous comparisons of the outcomes of non-medical versus GP prescribing. This information is needed to assess the clinical effectiveness of different care models.

This paper reports findings from an exploratory randomised controlled trial (RCT) comparing pharmacist medication review, with or without pharmacist prescribing, with standard care for patients with chronic pain. Development of the trial was informed by earlier feasibility work (14,15).

The hypothesis was that, in patients with chronic pain, pharmacist advice (with or without pharmacist prescribing) would lead to better patient functioning and/or better pain control at

1  
2 six months than treatment as usual (TAU). The hypothesis was developed prior to data  
3 collection.  
4  
5  
6  
7

## 8 **Methods**

### 9 *Regulatory Issues*

10  
11 Ethical approval was granted by the National Research Ethics Service Committee – North of  
12 Scotland (reference number 09/S0801/107). NHS Research and Development approval was  
13 granted by NHS Grampian and East Norfolk & Waveney Research Governance Committees.  
14  
15 Patients gave informed consent before taking part.  
16  
17  
18  
19

### 20 *Design*

21  
22 An open, exploratory RCT in which patients were randomised to one of three study arms.  
23  
24 Participants were not blind to allocated treatment arm due to the nature of the intervention.  
25  
26

### 27 *Recruitment of practices and independent prescribing pharmacists*

28  
29 Practices in Grampian, Scotland (n=18) and East Anglia, England (n=4) known to have an  
30 attached Royal Pharmaceutical Society of Great Britain registered independent pharmacist  
31 prescriber, were eligible to take part. From those indicating a willingness to participate,  
32 convenience sampling was used to identify six general practices: three in Grampian and three  
33 in East Anglia.  
34  
35  
36  
37

### 38 *Patient inclusion and exclusion criteria*

39  
40 Patients registered with the recruited practices were eligible for inclusion if they were over 18  
41 years of age, living in their own home, and receiving regular prescribed medication for pain.  
42  
43 Patients were identified by a computerised search {5 McDermott, M. E. 2006} of the drug  
44 records of all individuals registered with the practice, to identify those who had received either  
45 two or more acute prescriptions, and/or one repeat prescription within the last 120 days, for  
46 an analgesic (British National Formulary (BNF section 4.7) and/or non-steroidal anti-  
47 inflammatory medication (NSAID) (BNF section 10.1.1). Medications which can be used for  
48 analgesia but whose primary indication is not chronic pain (e.g. triptans, anti-epileptics or anti-  
49 depressants) were excluded as these drugs identify few additional eligible patients (16). In  
50 accordance with trial criteria, GPs excluded and recorded reasons for patients who had: a  
51  
52  
53  
54  
55  
56  
57  
58  
59  
60

1 concomitant severe mental health problem or terminal illness; had suffered recent  
2 bereavement; had a known alcohol or drug addiction; suffered pain caused by cancer or other  
3 malignancy; were unable to give informed consent; other (unspecified) reasons.  
4  
5  
6

#### 7 *Patient recruitment*

8 Eligible patients were sent an invitation pack (letter, information sheet, consent form) by  
9 practice staff between March and June 2010. Consent forms were returned directly to the  
10 researchers, who sent out a baseline questionnaire. Patients returning completed  
11 questionnaires were randomised by the researcher using a telephone randomisation service  
12 with a random number allocation which ensured allocation concealment. The allocation  
13 sequence was 1:1:1.  
14  
15  
16  
17  
18  
19  
20

#### 21 *Intervention*

22 All participating pharmacists took part in a two-day course updating them about pain  
23 management. As part of the training, participants defined and agreed the treatment algorithm  
24 they would all use.  
25  
26  
27  
28

29 'Prescribing' arm: Pharmacists invited patients to a face-to-face consultation. Prior to the  
30 consultation, pharmacists completed a paper-based medication review of each patient's  
31 medical record and patients were asked to complete a pain diary to inform the consultation. A  
32 pharmaceutical care plan was agreed between the pharmacist and the patient. The plan  
33 assessed and documented relevant past medical history and current conditions; known  
34 allergies and adverse drug reactions; relevant laboratory results; pain-related medications  
35 prescribed in the previous 10 years; current pain related prescription medications; current  
36 symptoms; lifestyle issues, including units of alcohol consumed per week; recommendations  
37 for changes to medication (if any); whether non-pharmaceutical treatments had been  
38 considered; and, any other relevant issues. At the end of the consultation any required  
39 prescriptions for medicines were issued by the pharmacist. Due to Controlled Drug (CD)  
40 regulations in place at the time, prescribing for CDs was done using a supplementary  
41 prescribing Clinical Management Plan (17), rather than independent prescribing. Patients were  
42 followed up either by phone or face-to-face, at each pharmacist's discretion.  
43  
44  
45  
46  
47  
48  
49  
50  
51  
52  
53

54 'Review arm': The pharmacists conducted a paper-based medication review focussed on pain-  
55 related prescription medications, before creating a pharmaceutical care plan which detailed  
56  
57  
58  
59  
60



1  
2 any recommendations for medication changes. The plan was passed to the patient's GP for  
3 implementation. The GPs were asked subsequently about actions taken as a result of the  
4 recommendations.  
5  
6

7  
8 Treatment as usual (TAU): Patients received standard general practice care.  
9

#### 10 *Outcome measures*

11  
12 There were two primary outcome measures: the Chronic Pain Grade (CPG) and the Medical  
13 Outcomes Study 12-item short form version 2 (SF-12v2). Use of both a pain specific and generic  
14 outcome measure was based on Initiative on Methods, Measurement, and Pain Assessment in  
15 Clinical Trials (IMMPACT) recommendations (18) and an earlier (18,19) feasibility study (15).  
16  
17

18  
19 The CPG (20) is a seven item scale which assesses pain severity on two dimensions: disability  
20 and intensity. The scale classifies pain according to level of intensity and disability (I (low  
21 disability-low intensity) to IV (high disability-severely limiting)).  
22  
23

24  
25 The SF-12v2 is a generic health and functioning scale (21), previously used in population-based  
26 studies of pain (22,23). A Physical (PCS) and Mental Component Score (MCS) was calculated,  
27 ranging from 0 to 100; a higher score indicates better functioning.  
28  
29

30  
31 A secondary outcome measure was the Hospital Anxiety and Depression Scale (HADS) (24), a  
32 14-item screening instrument which identifies the possible and probable caseness of anxiety (7  
33 items (HADS-A)) and depression (7 items (HADS-D)); each item scored from 0 (not present) to 3  
34 (highly present). Standard thresholds and previously used labels (25) were applied (no  
35 depression/anxiety (0-7), mild (8-10), moderate (11-15) or severe (>15)).  
36  
37

#### 38 *Data collection*

##### 39 *Participant questionnaires*

40  
41 Questionnaires were posted to participants at baseline (pre-randomisation), and 3 and 6  
42 months post-randomisation (follow-up was conducted between July 2010 and January 2011).  
43  
44 Up to two reminders were sent. Questionnaire content included the outcome measures  
45 described above together with items on: demographic status (baseline only); screening items  
46 to confirm eligibility (baseline only); duration of pain condition (baseline only); location of pain;  
47  
48  
49  
50  
51  
52  
53  
54  
55  
56  
57  
58  
59  
60

1  
2 Morisky Medication Adherence Scale 4 (MMAS-4) (26); participant satisfaction (11 statements  
3 derived from the feasibility study for the prescribing arm (3 months only) and additional  
4 comments by participants. The MMAS-4 provides a score of self-reported adherence to  
5 medication regimen. Scores range from 0 (low adherence) to 4 (high adherence).  
6  
7

#### 8 9 10 *Follow-up interviews with staff*

11 Post-intervention, all pharmacists and all GPs in participating practices were invited to take part  
12 in semi-structured interviews, carried out face-to-face when possible, otherwise by telephone.  
13 Interviews were taped, transcribed verbatim and content analysis was carried out.  
14  
15

#### 16 17 18 *Sample size*

19 As this was an exploratory trial to estimate the effect size for a larger trial, no formal sample  
20 size calculation was possible (27). We aimed to recruit 30 participants per practice (excluding  
21 those recruited for training purposes) i.e. 180 in total. This was deemed sufficient to give  
22 reliable effect size estimates for the primary outcome measures of chronic pain grade or health  
23 status.  
24  
25  
26  
27

#### 28 29 30 *Data management and analysis*

31 Data were entered into identical SPSS databases at each site and accuracy checks carried out  
32 on 10% before databases were merged. Descriptive statistics included means and standard  
33 deviations (SD) for normally distributed continuous data, medians (interquartile range (IQR))  
34 for skewed continuous data and percentages (n) for categorical data. Analysis was conducted  
35 on an intention-to-treat basis for participants with complete data on relevant measures using  
36 SPSS version 18.  
37  
38  
39  
40  
41

42  
43 Exploratory analyses for parametric data included the paired t-test for within-arm comparisons  
44 and one-way ANOVA for between arm comparisons. For non-parametric data it included the  
45 Wilcoxon Signed Rank test for within-arm comparisons and the Kruskal Wallis test for between  
46 arm comparisons. Categorical data was analysed using the marginal homogeneity test for  
47 within-arm comparisons and the Chi-squared test for between arm comparisons; analyses  
48 reported here are based on 6 month follow-up data (other than for participant experiences).  
49  
50  
51  
52  
53  
54

## 55 **Results**

### 56 57 *Response rates and demography*

58  
59  
60

1 Six of the seven practices approached participated. GPs excluded 12% (392/3281) of patients,  
2 mostly those with dementia. There was no statistically significant difference between  
3 participants and non-participants in terms of age, gender, and index of multiple deprivation.  
4  
5 Figure 1 shows the flow of participants through the study. Overall, the consent rate was 25%  
6  
7 (356/1397) and the recruitment rate was 14% (196/1397).  
8  
9

10  
11 [INSERT FIGURE 1 HERE]  
12

13  
14 Eighty six percent of participants (251/289) returned baseline questionnaires, of whom 232  
15 were randomised (36 participants were randomised to one of the two intervention arms for  
16 training purposes and were not included in any further analysis and 19 were not included as  
17 recruitment target had been met). The overall follow-up rate at 3 months was 86%  
18 (161/187) and at 6 months 84% (152/180).  
19  
20

21  
22 As shown in Table 1, groups were similar at baseline for demographic and socioeconomic  
23 variables and pain data. Most participants were married, Caucasian and female, older (mean  
24 (SD) age 65 (12.6) years), had an annual income of <£25,000 and had suffered from pain for at  
25 least five years. Most (57%;103/181) reported being fully adherent to their medication  
26 regimen (MMAS-4, median 4.0 (IQR 3.0- 4.0)) (15 missing MMAS scores).  
27  
28  
29  
30  
31

32  
33 [INSERT TABLE 1 HERE]  
34  
35

36 In the prescribing arm, 78% (53/68) attended an initial prescribing consultation, 31 had at least  
37 one planned follow-up (generally conducted by phone) and 130 recommendations were made  
38 for 92% (49/53) of participants seen. Examples are shown in Box 1. The median time taken for  
39 the note-based record review was 35 minutes (IQR 20.0, 45.0), the consultation was 30 minutes  
40 (IQR 20.0, 40.0), careplan preparation 10 minutes (IQR 10.0, 20.0) and median duration of  
41 follow-ups was 10 minutes (IQR 5.0- 15.0).  
42  
43  
44  
45  
46

47 [INSERT BOX 1 HERE]  
48  
49

50 In the review arm 97% (60/62) of participants' records were reviewed (note there was one post  
51 randomisation exclusion) for whom 197 recommendations were made. Where GP feedback  
52 was provided (n=48), they generally agreed with pharmacists' recommendations, which were  
53 fully implemented for 20 participants (two by the pharmacist following request by GP), partially  
54 for 19 participants and not at all for nine participants. The median time taken for the note-  
55  
56  
57  
58  
59  
60

1 based record review was 30 minutes (IQR24.3, 45.0), and careplan preparation was 10  
2 minutes (IQR 5.0, 20.0).  
3  
4  
5  
6  
7

### 8 *Clinical outcome measures*

9  
10 Table 2 shows the mean (SD) or median (IQR) of the CPG for each arm at baseline and 6 month  
11 follow-up. Table 3 shows the SF-12 scores and Table 4 shows the HADS-A and HADS-D results.  
12

13  
14 [INSERT TABLE 2,3,4, HERE]  
15

16  
17 In the prescribing arm, there was a statistically significant within arm improvement for the CPG  
18 intensity ( $p=0.002$ ) and disability ( $p=0.003$ ) subscales, and between arms on the intensity sub-  
19 scale ( $p=0.02$ ), but not the disability subscale ( $p=0.55$ ) (Table 2). There was a significant within-  
20 arm improvement in overall CPG grade in the prescribing ( $p=0.003$ ) and review arm ( $p=0.001$ ),  
21 but not in the TAU arm. The SF-12 Physical Component Score showed a statistically significant  
22 within arm improvement in the TAU arm ( $p=0.02$ , Table 3), but not between trial arms. The SF-  
23 12 Mental Component Score showed a statistically significant deterioration in the TAU arm  
24 ( $p=0.002$ , Table 3), as did the HADS-D ( $p=0.03$ , Table 4). Analysis was also carried out on the  
25 non-categorised HADS scores which showed a statistically significant improvement within the  
26 prescribing arm for Depression ( $p=0.022$ ) and Anxiety ( $p=0.007$ ). These were both significant  
27 between groups ( $p=0.022$  and  $p=0.045$  respectively) (Table 5).  
28  
29  
30  
31  
32  
33  
34  
35  
36

### 37 *Acceptability of the pharmacist prescribing intervention*

38 All six pharmacists and 56% of the GPs (23/41) were interviewed. All pharmacists and most GPs  
39 were positive about the intervention, although some GPs suggested that the pharmacists'  
40 recommendations had been minor and questioned the cost-effectiveness of the service.  
41 Patient participants were generally positive about the pharmacist prescribing service although  
42 some concerns were identified, as illustrated by the quotes shown in Box 2.  
43  
44  
45  
46  
47

48 [INSERT BOX 2 HERE]  
49

## 50 **Discussion**

### 51 *Principal findings*

52  
53 This exploratory RCT of pharmacist-led management of patients with chronic pain suggests that  
54 pharmacist prescribing (and possibly pharmacist review alone) may be effective in improving  
55  
56  
57  
58  
59  
60

1 pain-related outcomes and be acceptable to both patients and professionals. There was an  
2 indication of a positive effect on emotional health, but no measurable effect on general  
3 health.  
4  
5  
6

### 7 *Strengths and weaknesses*

8 This was the first RCT to assess clinical and humanistic outcomes after pharmacist prescribing  
9 for any clinical condition compared to usual GP care, and the first RCT to specifically assess  
10 pharmacist-led management of chronic pain, compared with usual GP care. It was based on  
11 extensive development and feasibility work (14,15) in line with MRC framework for  
12 development and evaluation of complex interventions (28). A range of validated outcome  
13 measures was included, as well as a parallel qualitative process evaluation which demonstrated  
14 satisfaction and acceptability. The inclusion of six practices and their associated pharmacists  
15 from both Scotland and England increased the generalisability of the findings. Pharmacists  
16 agreed and used a common treatment algorithm which should have increased standardisation  
17 of treatment.  
18  
19  
20  
21  
22  
23  
24  
25  
26

27 There were, however limitations. Although high follow-up response rates were achieved at  
28 both three (86%) and six months (85%) only 25% of eligible patients entered the trial. This low  
29 initial consent rate is in line with other studies (29,30), but may cause unknown biases  
30 including problems of generalisability. Rewording of participant recruitment documentation  
31 could address some of the concerns identified by participant feedback e.g. having too many  
32 people involved in one's care. More participants withdrew in the prescribing arm compared  
33 with the other two arms, which might be attributed to the need for an additional practice visit.  
34 The study was an exploratory trial so no formal power calculation was undertaken because of  
35 no prior knowledge of effect size. Due to the nature of the intervention, no participants were  
36 blind to their group allocation, and so some outcomes, especially the qualitative components,  
37 may have been affected by social desirability bias.  
38  
39  
40  
41  
42  
43  
44  
45  
46  
47

48 Our main outcome measures were self-reported, but this is the norm in pain studies as pain is a  
49 subjective experience (18). Furthermore we do not know how important the observed  
50 differences were to participants. Following precedents set in previous research (25), and  
51 because there is no consensus on an alternative measure (31) we used the HADS as a tool to  
52 classify people by severity of depression and anxiety. However it is strictly a screening tool, and  
53  
54  
55  
56  
57  
58  
59  
60

1 the four levels of severity have not been formally validated. We therefore also compared  
2 outcomes using it as a continuous scale.  
3  
4

### 5 *Relationship with other studies*

6 This study is important because no other RCT has evaluated pharmacist prescribing and few  
7 studies, and importantly no RCTs, have evaluated pharmacist interventions for pain. In  
8 pharmacist prescribing most research has focussed on reported experiences of professionals  
9 and patients, and not used validated outcome measures. Yet pharmacist prescribing is now  
10 widely practised. For pain, there have been a few small studies. Briggs et al (2008) (32)  
11 conducted a small before-and-after evaluation (involving 65 patients) of a nurse and  
12 pharmacist-led chronic pain clinic in primary care. Pain intensity Visual Analogue Scale scores  
13 reduced significantly over six months. Another evaluation of 26 patients using a medication  
14 review service provided jointly by a physiotherapist and pharmacist, reported improvement in  
15 pain control for 88% of patients (33).  
16  
17

18 The CPG was found to show a graded effect across the three arms, showing discrimination with  
19 both direction and strength of improvement, suggesting maximum benefit for those in the  
20 pharmacist prescribing arm. However, the reduction in overall score appears to be mediated by  
21 a change in the intensity of pain subscale rather than in pain-related disability. In contrast, the  
22 SF-12, a measure of general health and functionality showed no significant difference between  
23 intervention arms, reflecting either no effect or or lack of power to detect an effect.  
24  
25

26 Whilst most participants in this study were already within the normal range on the HADS scale,  
27 and therefore had minimal chance of improvement, there were nonetheless suggestions of  
28 better outcomes in participants in the prescribing arm. Including a range of instruments is  
29 in line with IMMPACT recommendations (34), which state that focus should be on the whole  
30 person, not just about pain. However, this needs to be balanced with minimising participant  
31 burden.  
32  
33

### 34 *Explanations, implications, and future research*

35 The number of pharmacists' recommendations per participant was higher in the review arm  
36 than in the prescribing arm. This might seem contradictory to the possible greater benefit  
37 found in the prescribing arm. However, in the prescribing arm pharmacists met the participant  
38 and may have more readily identified and dismissed suggestions previously tried. The  
39  
40  
41  
42  
43  
44  
45  
46  
47  
48

1  
2 interview feedback highlighted that some recommendations for change, whilst sensible, had  
3 been tried already. This might also be the reason why there were only 60% of pharmacist  
4 recommendations with which the GP fully agreed. Self-reported adherence to medication at  
5 baseline was good. Despite this, the pharmacists still improved pain outcomes in the  
6 prescribing arm. This could have been due to changes in medications and/or participant  
7 education about optimal timing for administration of analgesic medicines. Further research is  
8 needed to confirm the beneficial effect of pharmacist prescribing and its sustainability.  
9  
10  
11  
12  
13

### 14 **Conclusion**

15  
16 Our results suggest that pharmacist prescribing (and possibly pharmacist review alone) for  
17 patients with chronic pain is feasible, acceptable and leads to improvements in pain and other  
18 measures. A larger fully-powered trial is now needed to confirm these findings.  
19  
20  
21  
22

### 23 **Data sharing statement**

24  
25 Consent was not obtained from participants for data sharing; the presented data are  
26 anonymised and there is no risk of individual identification. Requests for data should be made to  
27 the contact author who will provide this in a format in which risk of patient identification will be  
28 minimal.  
29  
30  
31

### 32 **Conflict of interest statement**

33  
34 All authors have completed the Unified Competing Interest form at [www.icmje.org/coi\\_disclosure.pdf](http://www.icmje.org/coi_disclosure.pdf)  
35 (available on request from the corresponding author) and declare: no support from any organisation for  
36 the submitted work; no financial relationships with any organisations that might have an interest in the  
37 submitted work in the previous 3 years; no other relationships or activities that could appear to have  
38 influenced the submitted work.  
39  
40  
41  
42

### 43 **Authors' contributions**

44  
45 HB and CB drafted the manuscript.

46  
47 All authors:

- 48  
49  
50 1) made substantial contributions to conception and design, or acquisition of data, or analysis and  
51 interpretation of data;  
52  
53 2) were involved in drafting the manuscript or revising it critically for important intellectual content; and  
54  
55 3) have given final approval of the version to be published.  
56  
57  
58  
59  
60

## Acknowledgements

We thank the participating patients, practices and pharmacists. We would also like to thank Kirsten Harrild (Medical Statistics, UOA) for statistical support. Rick Adams (School of Pharmacy, UEA) helped design and deliver the pharmacist training and Lesley Thomson (NHS Grampian) helped design the pharmacist data collection forms. The patient postal questionnaire was based on work by Nicola Cooper and the Norfolk Arthritis Register (NOAR) research team. The Pharmacy-Led Management of Chronic Pain Study Team acknowledges the financial support of NHS Research Scotland (NRS), through Scottish Primary Care Research Network Northeast. The work was conducted as part of the Aberdeen Pain Research Collaboration. The project was funded by the Medical Research Council. They had no further involvement in any aspect of study conduct; all researchers were independent of the funding body.

All authors had access to all of the study data and can take responsibility for the integrity of the data and the accuracy of the data analysis.

## References

- (1) Elliott AM, Smith BH, Penny KI, Smith WC, Chambers WA. The epidemiology of chronic pain in the community. *Lancet* 1999;354:1248-1252.
- (2) Elliott AM, Smith BH, Hannaford P, Smith WC, Chambers WA. The course of chronic pain in the community: results of a 4-year follow-up study. *Pain* 2002;99:299-307.
- (3) Becker N, Bondegaard Thomsen A, Olsen AK, Sjøgren P, Bech P, Eriksen J. Pain epidemiology and health related quality of life in chronic non-malignant pain center patients referred to a Danish multidisciplinary. *Pain* 1997;73:393-400.
- (4) Breivik H, Collett B, Ventafridda V, Cohen R, Gallacher D. Survey of chronic pain in Europe: prevalence, impact on daily life, and treatment. *Eur J Pain* 2006;10:287-333.
- (5) Gureje O, Von Korff M, Simon GE, Gater R. Persistent pain and well-being: a World Health Organization Study in Primary Care. *JAMA* 1998;280:147-151.
- (6) Magni G, Marchetti M, Moreschi C, Merskey H, Luchini SR. Chronic musculoskeletal pain and depressive symptoms in the National Health and Nutrition Examination. I. Epidemiologic follow-up study. *Pain* 1993;53:163-168.
- (7) Sullivan MD, Turner JA, Romano J. Chronic pain in primary care: identification and management of psychological factors. *J Fam Pract* 1991;32:193-199.
- (8) Green S, Buchbinder R, Hetrick SE. Physiotherapy interventions for shoulder pain. *Cochrane Database of Syst Rev* 2010(9):Art. No.: CD004258. DOI: 10.1002/14651858.CD004258.



1  
2 (9) Eccleston C, Williams, A. C. D. C., Morley S. Psychological therapies for the management of  
3 chronic pain (excluding headache)  
4 in adults. Cochrane Database Syst Rev 2009 Apr 15;(2):CD007407. DOI:  
5 10.1002/14651858.CD007407.pub2.  
6

7  
8 (10) Haetzman M, Elliott AM, Smith BH, Hannaford P, Chambers WA. Chronic pain and the use  
9 of conventional and alternative therapy. Family Practice 2003;20(2):147-154.  
10

11 (11) Pirmohamed M, James S, Meakin S, Green C, Scott AK, Walley TJ, et al. Adverse drug  
12 reactions as cause of admission to hospital: prospective analysis of 18 820 patients. BMJ  
13 2004;329:15.  
14

15  
16 (12) Krska J, Cromarty JA, Arris F, Jamieson D, Hansford D, Duffus PR, et al. Pharmacist-led  
17 medication review in patients over 65: a randomized, controlled trial in primary care. Age and  
18 Ageing 2001;30:205-211.  
19

20  
21 (13) Department of Health. Improving patients' access to medicines: A guide to implementing  
22 nurse and pharmacist independent prescribing within the NHS England. Department of Health  
23 2006.  
24

25  
26 (14) McDermott ME, Smith BH, Elliott AM, Bond CM, Hannaford P, Chambers WA. The use of  
27 medication for chronic pain in primary care, and the potential for intervention by practice-  
28 based pharmacist. Family Practice 2006;23:46-52.  
29

30  
31 (15) Bruhn H, Bond CM, Elliott AM, Hannaford PC, Lee AJ, McNamee P, et al. Developing an RCT  
32 of general practice-based, pharmacist-led, management of chronic pain: the PIPPC study. IJPP  
33 2010;18(Supplement 2).  
34

35  
36 (16) Smith BH, Read JRM, Chambers WAC, Watt B, Grimshaw JM. Researching chronic pain:  
37 identification of a community based sample. The Pain Clinic 1996;9:73-76.  
38

39  
40 (17) Department of Health. Supplementary prescribing by nurses and pharmacists within the  
41 NHS in England: A guide for implementation. Department of Health 2003.  
42

43  
44 (18) Turk DC, Dworkin RH, Allen RR, Bellamy N, Brandenburg N, Carr DB, et al. Core outcome  
45 domains for chronic pain clinical trials: IMMPACT recommendations. Pain 2003 12;106(3):337-  
46 345.  
47

48  
49 (19) The Community Pharmacy Medicines Management Project Evaluation Team. The  
50 MEDMAN study: a randomized controlled trial of community pharmacy-led medicines  
51 management for patients with coronary heart disease. Family Practice 2007;24:189-200.  
52

53  
54 (20) Von Korff M, Ormel J, Keefe FJ, Dworkin SF. Grading the severity of chronic pain. Pain  
55 1992;50:133-149.  
56

57  
58 (21) Ware JE, Kosinski M, Turner-Bowker DM, Sundaram M, Gandek B, Maruish ME. User's  
59 Manual for the SF-12v2 Health Survey. Second edition ed.: QualityMetric, Incorporated, 2009;  
60 2009.

- 1  
2 (22) Nicholl BI, Macfarlane GJ, Davies KA, Morriss R, Dickens C, McBeth J. Premorbid  
3 psychosocial factors are associated with poor health-related quality of life in subjects with new  
4 onset of chronic widespread pain - results from the EPIFUND study. *Pain* 2009;141:119-126.  
5  
6 (23) Carmona L, Ballina J, Gabriel R, Laffon A. The burden of musculoskeletal diseases in the  
7 general population of Spain: results from a national survey. *Ann Rheum Dis* 2001;60:1040-1045.  
8  
9 (24) Zigmond AS, Snaith RP. The hospital anxiety and depression scale. *Acta Psychiatr Scand*  
10 1983 Jun;67(6):361-370.  
11  
12 (25) Snaith RP, Zigmond AS. HADS: Hospital Anxiety and Depression Scale. Windsor: NFER  
13 Nelson; 1994.  
14  
15 (26) Morisky DE, Green LW, Levine DM. Concurrent and predictive validity of a self-reported  
16 measure of medication adherence. *Med Care* 1986 Jan;24(1):67-74.  
17  
18 (27) Lancaster GA, Dood S, Williamson PR. Design and analysis of pilot studies:  
19 recommendations for good practice. *J Eval Clin Pract* 2004;10(2):307-312.  
20  
21 (28) Craig P, Dieppe P, Macintyre S, Michie S, Nazareth I, Petticrew M. Developing and  
22 evaluating complex interventions: the new Medical Research Council guidance. *BMJ*  
23 2008;337:a1655.  
24  
25 (29) Community Pharmacy Medicines Management Project Evaluation Team. The MEDMAN  
26 study: a randomized controlled trial of community pharmacy-led medicines management for  
27 patients with coronary heart disease. *Family Practice* 2007;24:189-200.  
28  
29 (30) Treweek S, Mitchell E, Pitkethly M, Cook J, Kjeldstrøm M, Johansen M, et al. Strategies to  
30 improve recruitment to randomised controlled trials. *Cochrane Database Syst Rev*  
31 2010;(4):MR000013 2011.  
32  
33 (31) Cameron IM, Cardy A, Crawford JR, du Toit Schalk W, Hay S, Lawton K, et al. Measuring  
34 depression severity in general practice: discriminatory performance of the PHQ-9, HADS-D, and  
35 BDI-II. *Br J Gen Pract* 2011;61:e419-e426(8).  
36  
37 (32) Briggs M, Closs SJ, Marczewski K, Barratt J. A feasibility study of a combined  
38 nurse/pharmacist-led chronic pain clinic in primary care. *Qual Prim Care* 2008;16:91-94.  
39  
40 (33) Anonymous. Pharmacist and physiotherapist-led community outreach pain programme  
41 improve quality of life. *The Pharmaceutical Journal* 2005;275:14.  
42  
43 (34) Turk DC, Dworkin RH, Revicki D, Harding G, Burke LB, Cella D, et al. Identifying important  
44 outcome domains for chronic pain clinical trials: An IMMPACT survey of people with pain.  
45 2008;137:276-285.  
46  
47  
48  
49  
50  
51  
52  
53  
54  
55  
56  
57  
58  
59  
60

1  
2  
3  
4  
5  
6  
7  
8  
9  
10  
11  
12  
13  
14  
15  
16  
17  
18  
19  
20  
21  
22  
23  
24  
25  
26  
27  
28  
29  
30  
31  
32  
33  
34  
35  
36  
37  
38  
39  
40  
41  
42  
43  
44  
45  
46  
47  
48  
49  
50  
51  
52  
53  
54  
55  
56  
57  
58  
59  
60

For peer review only

Figure 1: CONSORT Flow Diagram

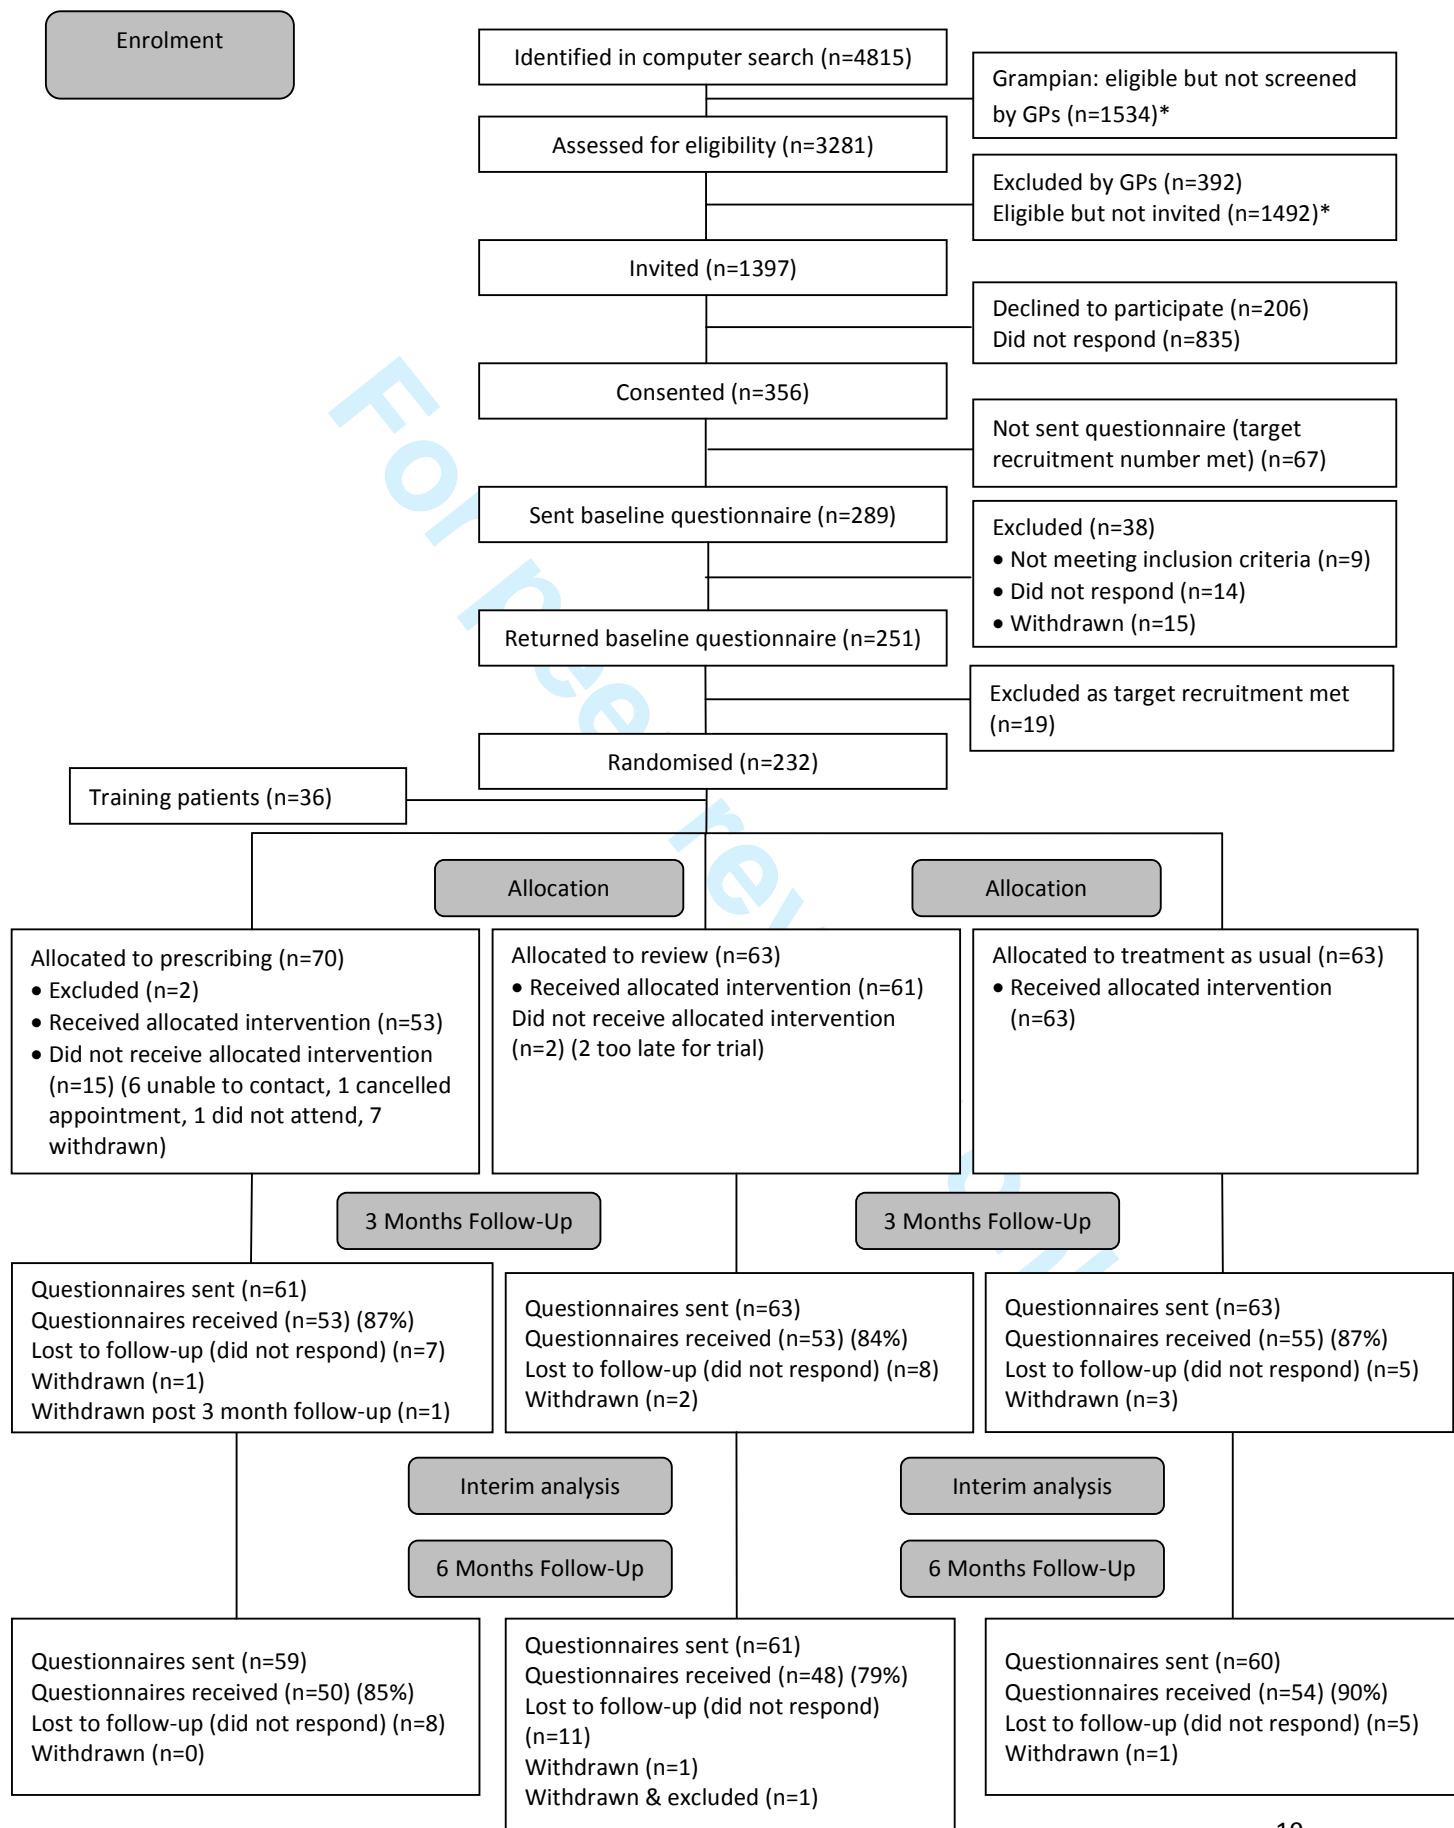

1  
2 \*In Grampian, on the basis of response rates in the earlier feasibility study (241 screened patients  
3 resulted in 22 recruited) only a random sample of eligible participants were screened (15). In East Anglia  
4 all eligible patients were screened.  
5  
6  
7  
8  
9  
10  
11  
12  
13  
14  
15  
16  
17  
18  
19  
20  
21  
22  
23  
24  
25  
26  
27  
28  
29  
30  
31  
32  
33  
34  
35  
36  
37  
38  
39  
40  
41  
42  
43  
44  
45  
46  
47  
48  
49  
50  
51  
52  
53  
54  
55  
56  
57  
58  
59  
60

For peer review only

**Table 1:** Baseline demographic, socio-economic and pain data of patients by study arm, prescribing, review and treatment as usual (TAU)

|                                           | Prescribing* | Review*     | TAU*        |
|-------------------------------------------|--------------|-------------|-------------|
|                                           | (n = 68)     | (n = 62)    | (n = 63)    |
| Age: mean (SD)                            | 66.1 (12.1)  | 65.7 (14.2) | 64.9 (11.6) |
| Missing                                   | 1            | 1           | 0           |
| Gender (% female)                         | 54.4 (37)    | 74.2 (46)   | 58.7 (37)   |
| <i>Marital status</i>                     |              |             |             |
| Married                                   | 43           | 30          | 41          |
| Single                                    | 6            | 6           | 3           |
| Divorced/widow                            | 10           | 21          | 13          |
| Other                                     | 6            | 4           | 6           |
| Missing                                   | 3            | 1           | 0           |
| <i>Highest educational level achieved</i> |              |             |             |
| No qualifications                         | 30           | 27          | 21          |
| O grade or equivalent                     | 12           | 6           | 14          |
| Higher/A-level/NVQ3/SVQ3                  | 6            | 8           | 7           |
| Tertiary education/NVQ4/NVQ5              | 18           | 17          | 14          |
| Other                                     | 2            | 1           | 4           |
| Missing                                   | 0            | 3           | 3           |
| <i>Employment status</i>                  |              |             |             |
| Employed                                  | 16           | 14          | 9           |
| Unemployed                                | 3            | 5           | 1           |
| Retired                                   | 38           | 35          | 34          |
| Long term sick/disabled                   | 7            | 5           | 9           |
| Other                                     | 3            | 2           | 7           |
| Missing                                   | 1            | 1           | 3           |
| <i>Household annual income before tax</i> |              |             |             |
| Less than £9,999                          | 13           | 15          | 10          |
| £10,000 - £14,999                         | 14           | 18          | 22          |
| £15,000 - £24,999                         | 14           | 12          | 12          |
| £25,000 – or more                         | 22           | 11          | 8           |
| Missing                                   | 5            | 6           | 11          |
| <i>Ethnic group</i>                       |              |             |             |
| Caucasian                                 | 67           | 62          | 61          |
| Other                                     | 1            |             |             |
| Missing                                   | 0            | 0           | 2           |
| <i>Pain duration</i>                      |              |             |             |
| < 1 year                                  | 3            | 2           | 4           |
| 1 – 3 years                               | 12           | 12          | 7           |
| 3 – 5 years                               | 10           | 13          | 9           |
| 5 – 10 years                              | 17           | 13          | 15          |
| > 10 years                                | 26           | 22          | 28          |
| <i>Pain localisation (% , n)</i>          |              |             |             |
| Back                                      | 27.9 (19)    | 32.3 (20)   | 20.6 (13)   |
| Neck, shoulders                           | 7.4 (5)      | 9.7 (6)     | 9.5 (6)     |
| Limbs or hips                             | 42.6 (29)    | 30.6 (19)   | 50.8 (32)   |
| Other                                     | 8.8 (6)      | 4.8 (3)     | 7.9 (5)     |
| Missing                                   | 9            | 14          | 7           |

\*Denominator based on numbers allocated to the specific arms, minus any exclusions due to protocol violations.

**Table 2:** Mean (standard deviation, SD) CPG intensity, median (interquartile range, IQR) CPG disability, and count CPG grade at baseline, 6 months follow-up and difference between the two assessment points for each arm, prescribing, review and treatment as usual (TAU). P-values for within and between arm differences are also reported.

|                                  | Prescribing |                   | Review |                    | TAU |                   | P (between groups) |
|----------------------------------|-------------|-------------------|--------|--------------------|-----|-------------------|--------------------|
|                                  | n*          | Mean (SD)         | n*     | Mean (SD)          | n*  | Mean (SD)         |                    |
| Baseline CPG intensity           | 47          | 66.1 (16.0)       | 45     | 68.4 (17.6)        | 54  | 65.4 (18.0)       | 0.02               |
| 6 month follow-up CPG intensity  |             | 58.1 (19.5)       |        | 67.4 (21.7)        |     | 65.6 (19.6)       |                    |
| Difference CPG intensity         |             | -8.0 (16.3)       |        | -1.0 (16.0)        |     | 0.2 (14.9)        |                    |
| P (within groups)                |             | 0.002             |        | 0.67               |     | 0.93              |                    |
|                                  |             | Median [IQR]      |        | Median [IQR]       |     | Median [IQR]      |                    |
| Baseline CPG disability          | 48          | 60.0 [30.0; 75.8] | 46     | 66.7 [45.0; 80.0]  | 53  | 56.7 [36.7; 80.0] | 0.55               |
| 6 Month follow-up CPG disability |             | 40.0 [20.0; 60.0] |        | 53.3 [29.2; 73.3]  |     | 50.0 [25.0; 80.0] |                    |
| Difference CPG disability        |             | -8.3 [-23.3; 0.0] |        | -3.3 [-16.7; 10.0] |     | -3.3 [-21.7; 5.0] |                    |
| P (within groups)                |             | 0.003             |        | 0.15               |     | 0.05              |                    |
| Baseline CPG grade               | 44          | Count (%)         | 44     | Count (%)          | 48  | Count (%)         | 0.16               |
| I                                |             | 5 (11.4)          |        | 3 (6.8)            |     | 5 (10.4)          |                    |
| II                               |             | 16 (36.4)         |        | 9 (20.5)           |     | 13 (27.1)         |                    |
| III                              |             | 7 (15.9)          |        | 10 (22.7)          |     | 13 (27.1)         |                    |
| VI                               |             | 16 (36.4)         |        | 22 (50.0)          |     | 17 (35.4)         |                    |
| 6 month follow-up CPG grade      |             |                   |        |                    |     |                   |                    |
| I                                |             | 13 (29.5)         |        | 8 (18.2)           |     | 6 (12.5)          |                    |
| II                               |             | 13 (29.5)         |        | 15 (34.1)          |     | 17 (35.4)         |                    |
| III                              |             | 8 (18.2)          |        | 8 (18.2)           |     | 11 (22.9)         |                    |
| IV                               |             | 10 (22.7)         |        | 13 (29.5)          |     | 14 (29.2)         |                    |
| Difference CPG grade             |             |                   |        |                    |     |                   |                    |
| ≤-1                              |             | 21 (47.7)         |        | 17 (38.6)          |     | 15 (31.2)         |                    |
| 0                                |             | 17 (38.6)         |        | 25 (56.8)          |     | 25 (52.1)         |                    |
| ≥1                               |             | 6 (13.6)          |        | 2 (4.5)            |     | 8 (2.1)           |                    |
| P (within groups)                |             | 0.003             |        | 0.001              |     | 0.17              |                    |

\*Number of participants in each group who completed the appropriate part of the CPG at both baseline and follow-up.

**Table 3:** Mean (standard deviation, SD) SF12 Physical Component Score (PCS) and median (interquartile range, IQR) Mental Component Score (MCS) at baseline and 6 month follow-up and difference between the two assessment points for each arm, prescribing, review and treatment as usual (TAU). Within and between arm p-values are also reported.

|                            | Prescribing |                   | Review |                   | TAU |                   | P (between groups) |
|----------------------------|-------------|-------------------|--------|-------------------|-----|-------------------|--------------------|
|                            | n*          | Mean (SD)         | n*     | Mean (SD)         | n*  | Mean (SD)         |                    |
| Baseline SF12 PCS          | 41          | 33.5 (10.8)       | 43     | 32.59(11.38)      | 45  | 29.60 (9.71)      | 0.75               |
| 6 month follow-up SF12 PCS |             | 35.3 (10.8)       |        | 34.62 (11.26)     |     | 32.59 (9.14)      |                    |
| Difference SF12 PCS        |             | 1.8 (7.5)         |        | 2.02 (7.56)       |     | 2.99 (8.11)       |                    |
| P (within groups)          |             | 0.12              |        | 0.09              |     | 0.02              |                    |
|                            |             | Median [IQR]      |        | Median (IQR)      | 45  | Median (IQR)      |                    |
| Baseline SF12 MCS          | 42          | 52.4 [42.0; 58.8] | 43     | 47.9 [38.5; 59.9] |     | 51.5 [41.3; 60.7] | 0.04               |
| 6 month follow-up SF12 MCS |             | 49.6 [42.8; 58.1] |        | 47.9 [38.9; 56.2] |     | 44.7 [37.6; 55.8] |                    |
| Difference SF12 MCS        |             | -0.4 [-3.7; 6.0]  |        | -1.2 [-6.6; 4.2]  |     | -3.0 [-10.0; 1.3] |                    |
| P (within groups)          |             | 0.64              |        | 0.37              |     | 0.002             |                    |

\* Number of participants in each group who completed the appropriate part of the SF-12 at both baseline and follow-up.



**Table 4:** The HADS-Depression (HADS-D) and HADS-Anxiety (HADS-A) count of patients according to severity (normal, mild, moderate or severe) and the difference in severity category between the two assessment points for each arm, prescribing, review and treatment as usual (TAU). Within and between arm p-values are also reported.\*

|                          | n  | Prescribing | n  | Review    | n  | TAU       | P (between groups) |
|--------------------------|----|-------------|----|-----------|----|-----------|--------------------|
| Baseline HADS-D          | 44 | Count (%)   | 45 | Count (%) | 53 | Count (%) |                    |
| Normal                   |    | 32 (72.7)   |    | 31 (68.9) |    | 38 (71.7) |                    |
| Mild                     |    | 8 (18.2)    |    | 11 (24.4) |    | 7 (13.2)  |                    |
| Moderate                 |    | 3 (6.8)     |    | 3 (6.7)   |    | 8 (15.1)  |                    |
| Severe                   |    | 1 (2.3)     |    | 0         |    | 0         |                    |
| 6 month follow-up HADS-D |    |             |    |           |    |           |                    |
| Normal                   |    | 32 (72.7)   |    | 32 (71.1) |    | 32 (60.4) |                    |
| Mild                     |    | 7 (15.9)    |    | 6 (13.3)  |    | 10 (18.9) |                    |
| Moderate                 |    | 5 (11.4)    |    | 6 (13.3)  |    | 8 (15.1)  |                    |
| Severe                   |    | 0           |    | 1 (2.2)   |    | 3 (5.7)   |                    |
| Difference HADS-D        |    |             |    |           |    |           |                    |
| ≤-1                      |    | 5 (11.4)    |    | 4 (8.9)   |    | 2 (3.8)   |                    |
| 0                        |    | 34 (77.3)   |    | 37 (82.0) |    | 40 (75.5) |                    |
| ≥1                       |    | 5 (11.4)    |    | 4 (8.9)   |    | 11 (20.8) | Not valid**        |
| P (within groups)        |    | 1.0         |    | 0.71      |    | 0.03      |                    |
| Baseline HADS-A          | 44 | Count (%)   | 43 | Count (%) | 48 | Count (%) |                    |
| Normal                   |    | 25 (56.8)   |    | 30 (69.8) |    | 29 (60.4) |                    |
| Mild                     |    | 8 (18.2)    |    | 7 (16.3)  |    | 9 (18.8)  |                    |
| Moderate                 |    | 8 (18.2)    |    | 5 (11.6)  |    | 8 (16.7)  |                    |
| Severe                   |    | 3 (6.8)     |    | 1 (2.3)   |    | 2 (4.2)   |                    |
| 6 month follow-up HADS-A |    |             |    |           |    |           |                    |
| Normal                   |    | 27 (61.4)   |    | 29 (67.4) |    | 32 (66.7) |                    |
| Mild                     |    | 7 (15.9)    |    | 6 (14.0)  |    | 5 (10.4)  |                    |
| Moderate                 |    | 8 (18.2)    |    | 6 (14.0)  |    | 10 (20.8) |                    |
| Severe                   |    | 2 (4.5)     |    | 2 (4.7)   |    | 1 (2.1)   |                    |
| Difference HADS-A        |    |             |    |           |    |           |                    |
| ≤-1                      |    | 6 (13.6)    |    | 3 (7.0)   |    | 10 (20.8) |                    |
| 0                        |    | 35 (79.5)   |    | 33 (76.7) |    | 29 (60.4) |                    |
| ≥1                       |    | 3 (6.8)     |    | 7 (16.3)  |    | 9 (18.8)  | 0.14               |
| P (within groups)        |    | 0.25        |    | 0.21      |    | 0.55      |                    |

\* Number of participants in each group who completed the appropriate part of the HADS at both baseline and follow-up.

\*\*Between arms p-value not valid due to low numbers in multiple cells, even after collapsing to three categories.

**Table 5:** Median HADS-Depression (HADS-D) and HADS-Anxiety (HADS-A) scores (interquartile range, IQR) at baseline and 6 month follow-up and difference between the two assessment point for each arm, prescribing, review and treatment as usual (TAU). Within and between arm p-values are also reported.

|                          | Prescribing |                  | Review |                 | TAU |                 | P (between groups) |
|--------------------------|-------------|------------------|--------|-----------------|-----|-----------------|--------------------|
|                          | n           | Median [IQR]     | n      | Median [IQR]    | n   | Median [IQR]    |                    |
| Baseline HADS-D          | 42          | 5.0 [3.0; 8.0]   | 44     | 4.5 [2.3; 8.0]  | 51  | 5.0 [3.0; 8.0]  | 0.02               |
| 6 month follow-up HADS-D |             | 4.0 [2.0; 8.0]   |        | 5.0 [2.0; 8.8]  |     | 5.0 [2.0; 10.0] |                    |
| Difference HADS-D        |             | -1.0 [-2.0; 0.0] |        | 0.0 [-1.0; 1.8] |     | 0.0 [-1.0; 2.0] |                    |
| P (within groups)        |             | 0.02             |        | 0.33            |     | 0.22            |                    |
| Baseline HADS-A          | 44          | 7.0 [3.3; 10.8]  | 43     | 5.0 [3.0; 10.0] | 48  | 6.0 [4.0; 10.0] | 0.05               |
| 6 month follow-up HADS-A |             | 5.0 [2.3; 9.8]   |        | 6.0 [3.0; 9.0]  |     | 7.0 [4.0; 10.0] |                    |
| Difference HADS-A        |             | -1.0 [-2.0; 0.0] |        | 0.0 [-2.0; 2.0] |     | 0.5 [-3.0; 2.0] |                    |
| P (within groups)        |             | 0.01             |        | 0.45            |     | 0.81            |                    |

\* Number of participants in each group who completed the appropriate part of the HADS at both baseline and follow-up.

1  
2  
3  
4  
5  
6  
7  
8  
9  
10  
11  
12  
13  
14  
15  
16  
17  
18  
19  
20  
21  
22  
23  
24  
25  
26  
27  
28  
29  
30  
31  
32  
33  
34  
35  
36  
37  
38  
39  
40  
41  
42  
43  
44  
45  
46  
47  
48  
49  
50  
51  
52  
53  
54  
55  
56  
57  
58  
59  
60

Box 1 Examples of pharmacist interventions in the prescribing arm

**Changes to pain management:** 'use paracetamol regularly', 'take tramadol if needed' 'add piroxicam gel PRN', 'given web links to self help groups'

**Compliance aid:** 'gave written times that this drug could be taken'

**Addressing side effects/safety:** 'take paracetamol after initial NSAID', 'take senna', 'ordered blood monitoring', 'stop use of two NSAIDS'

**General health:** 'discussed weight loss', 'invited to practice nurse for BP', 'glucose, lipids and lifestyle update',

**Cost minimisation:** 'change aspirin EC to plain',

1  
2 BOX 2 Examples of quotes from Pharmacists (n=6), GPs (n=23) and patient participants (n=40)  
3 on the prescribing intervention  
4

5 **Pharmacists (from interviews):**

6  
7 **Satisfying** (n=6): 'contact with patients', 'being able to help patients', 'being able to make a  
8 difference to long-standing pain'...'even in small ways'  
9

10  
11 **Interesting** (n=6): 'learning about pain'  
12

13 **Challenging** (n=6): 'complex, chronically ill patients'  
14

15 **GPs (from interviews):**

16  
17 **Support for the service** (n=17): 'it's been a very positive thing'  
18

19  
20 **Agreement with pharmacists' recommendations** (n=23): 'oh very reasonable suggestions',  
21 'tinkering round the edges', 'had been tried already'.  
22

23 **Trust in the practice pharmacist** (n=23): 'I respect his professional judgement'  
24

25 **Cost effectiveness** (n=6): 'if there's limited resources do we want to spend the money on a  
26 pharmacist'.  
27

28  
29 **Patients (from 3 month questionnaire):**

30  
31 **Closed questions:**

32 Proportion agreeing that:

33 The pharmacist was interested in them (89%; 39/44)

34 They were totally satisfied (85%; 39/46)

35 They were told about their treatment (82%; 38/46)

36 Their consultation was thorough (79%; 34/44)

37 They would have liked more time (9%; 4/44)

38 They would have preferred to see their GP (9%; 4/44)

39 Too many people were now involved in their treatment (11%; 5/44).  
40  
41

42  
43 **Open text questions:**

44  
45  
46 Positive (n=39): 'She was professional, relaxed, pleasant and interested. Excellent!'  
47

48 Negative (n=1): 'A waste of time, altered my tablets which made my pain worse'.  
49  
50  
51  
52  
53  
54  
55  
56  
57  
58  
59  
60

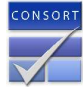

## CONSORT 2010 checklist of information to include when reporting a randomised trial\*

| Section/Topic                    | Item No | Checklist item                                                                                                                                                                              | Reported on page No |
|----------------------------------|---------|---------------------------------------------------------------------------------------------------------------------------------------------------------------------------------------------|---------------------|
| <b>Title and abstract</b>        |         |                                                                                                                                                                                             |                     |
|                                  | 1a      | Identification as a randomised trial in the title                                                                                                                                           | 1                   |
|                                  | 1b      | Structured summary of trial design, methods, results, and conclusions (for specific guidance see CONSORT for abstracts)                                                                     | 3-4                 |
| <b>Introduction</b>              |         |                                                                                                                                                                                             |                     |
| Background and objectives        | 2a      | Scientific background and explanation of rationale                                                                                                                                          | 5                   |
|                                  | 2b      | Specific objectives or hypotheses                                                                                                                                                           | 5-6                 |
| <b>Methods</b>                   |         |                                                                                                                                                                                             |                     |
| Trial design                     | 3a      | Description of trial design (such as parallel, factorial) including allocation ratio                                                                                                        | 6                   |
|                                  | 3b      | Important changes to methods after trial commencement (such as eligibility criteria), with reasons                                                                                          | N/A                 |
| Participants                     | 4a      | Eligibility criteria for participants                                                                                                                                                       | 6                   |
|                                  | 4b      | Settings and locations where the data were collected                                                                                                                                        | 6                   |
| Interventions                    | 5       | The interventions for each group with sufficient details to allow replication, including how and when they were actually administered                                                       | 7-8                 |
| Outcomes                         | 6a      | Completely defined pre-specified primary and secondary outcome measures, including how and when they were assessed                                                                          | 8                   |
|                                  | 6b      | Any changes to trial outcomes after the trial commenced, with reasons                                                                                                                       | N/A                 |
| Sample size                      | 7a      | How sample size was determined                                                                                                                                                              | 9                   |
|                                  | 7b      | When applicable, explanation of any interim analyses and stopping guidelines                                                                                                                | N/A                 |
| <b>Randomisation:</b>            |         |                                                                                                                                                                                             |                     |
| Sequence generation              | 8a      | Method used to generate the random allocation sequence                                                                                                                                      | 7                   |
|                                  | 8b      | Type of randomisation; details of any restriction (such as blocking and block size)                                                                                                         | N/A                 |
| Allocation concealment mechanism | 9       | Mechanism used to implement the random allocation sequence (such as sequentially numbered containers), describing any steps taken to conceal the sequence until interventions were assigned | 7                   |
| Implementation                   | 10      | Who generated the random allocation sequence, who enrolled participants, and who assigned participants to interventions                                                                     | 7                   |
| Blinding                         | 11a     | If done, who was blinded after assignment to interventions (for example, participants, care providers, those                                                                                | N/A                 |

|    |                          |                                                                                                                     |              |
|----|--------------------------|---------------------------------------------------------------------------------------------------------------------|--------------|
| 1  |                          |                                                                                                                     |              |
| 2  |                          | assessing outcomes) and how                                                                                         |              |
| 3  |                          |                                                                                                                     |              |
| 4  |                          | 11b If relevant, description of the similarity of interventions                                                     | N/A          |
| 5  | Statistical methods      | 12a Statistical methods used to compare groups for primary and secondary outcomes                                   | 9            |
| 6  |                          | 12b Methods for additional analyses, such as subgroup analyses and adjusted analyses                                | N/A          |
| 7  |                          |                                                                                                                     |              |
| 8  | <b>Results</b>           |                                                                                                                     |              |
| 9  | Participant flow (a      | 13a For each group, the numbers of participants who were randomly assigned, received intended treatment, and        | 10, figure   |
| 10 | diagram is strongly      | were analysed for the primary outcome                                                                               | 1(p.18)      |
| 11 | recommended)             | 13b For each group, losses and exclusions after randomisation, together with reasons                                | 10, figure   |
| 12 |                          |                                                                                                                     | 1(p.18)      |
| 13 |                          |                                                                                                                     |              |
| 14 | Recruitment              | 14a Dates defining the periods of recruitment and follow-up                                                         | 7-8          |
| 15 |                          | 14b Why the trial ended or was stopped                                                                              | N/A          |
| 16 | Baseline data            | 15 A table showing baseline demographic and clinical characteristics for each group                                 | 10, Table 1  |
| 17 |                          |                                                                                                                     | (p20)        |
| 18 |                          |                                                                                                                     |              |
| 19 | Numbers analysed         | 16 For each group, number of participants (denominator) included in each analysis and whether the analysis was      | See Tables   |
| 20 |                          | by original assigned groups                                                                                         | 2,3,4,5 and  |
| 21 |                          |                                                                                                                     | page 9 (ITT) |
| 22 |                          |                                                                                                                     |              |
| 23 | Outcomes and             | 17a For each primary and secondary outcome, results for each group, and the estimated effect size and its           | See pages    |
| 24 | estimation               | precision (such as 95% confidence interval)                                                                         | 10/11, and   |
| 25 |                          |                                                                                                                     | Tables       |
| 26 |                          |                                                                                                                     | 2,3,4,5.     |
| 27 |                          |                                                                                                                     | P values     |
| 28 |                          |                                                                                                                     | reported     |
| 29 |                          |                                                                                                                     |              |
| 30 |                          | 17b For binary outcomes, presentation of both absolute and relative effect sizes is recommended                     | N/A          |
| 31 | Ancillary analyses       | 18 Results of any other analyses performed, including subgroup analyses and adjusted analyses, distinguishing       | N/A          |
| 32 |                          | pre-specified from exploratory                                                                                      |              |
| 33 |                          |                                                                                                                     |              |
| 34 | Harms                    | 19 All important harms or unintended effects in each group (for specific guidance see CONSORT for harms)            | N/A          |
| 35 | <b>Discussion</b>        |                                                                                                                     |              |
| 36 | Limitations              | 20 Trial limitations, addressing sources of potential bias, imprecision, and, if relevant, multiplicity of analyses | 12           |
| 37 | Generalisability         | 21 Generalisability (external validity, applicability) of the trial findings                                        | 12-13        |
| 38 |                          |                                                                                                                     |              |
| 39 | Interpretation           | 22 Interpretation consistent with results, balancing benefits and harms, and considering other relevant evidence    | 13           |
| 40 | <b>Other information</b> |                                                                                                                     |              |
| 41 | Registration             | 23 Registration number and name of trial registry                                                                   | 4            |
| 42 |                          |                                                                                                                     |              |

|    |          |    |                                                                                 |
|----|----------|----|---------------------------------------------------------------------------------|
| 1  |          |    |                                                                                 |
| 2  |          |    |                                                                                 |
| 3  | Protocol | 24 | Where the full trial protocol can be accessed, if available                     |
| 4  | Funding  | 25 | Sources of funding and other support (such as supply of drugs), role of funders |
| 5  |          |    |                                                                                 |
| 6  |          |    |                                                                                 |
| 7  |          |    |                                                                                 |
| 8  |          |    |                                                                                 |
| 9  |          |    |                                                                                 |
| 10 |          |    |                                                                                 |
| 11 |          |    |                                                                                 |
| 12 |          |    |                                                                                 |
| 13 |          |    |                                                                                 |
| 14 |          |    |                                                                                 |
| 15 |          |    |                                                                                 |
| 16 |          |    |                                                                                 |
| 17 |          |    |                                                                                 |
| 18 |          |    |                                                                                 |
| 19 |          |    |                                                                                 |
| 20 |          |    |                                                                                 |
| 21 |          |    |                                                                                 |
| 22 |          |    |                                                                                 |
| 23 |          |    |                                                                                 |
| 24 |          |    |                                                                                 |
| 25 |          |    |                                                                                 |
| 26 |          |    |                                                                                 |
| 27 |          |    |                                                                                 |
| 28 |          |    |                                                                                 |
| 29 |          |    |                                                                                 |
| 30 |          |    |                                                                                 |
| 31 |          |    |                                                                                 |
| 32 |          |    |                                                                                 |
| 33 |          |    |                                                                                 |
| 34 |          |    |                                                                                 |
| 35 |          |    |                                                                                 |
| 36 |          |    |                                                                                 |
| 37 |          |    |                                                                                 |
| 38 |          |    |                                                                                 |
| 39 |          |    |                                                                                 |
| 40 |          |    |                                                                                 |
| 41 |          |    |                                                                                 |
| 42 |          |    |                                                                                 |
| 43 |          |    |                                                                                 |
| 44 |          |    |                                                                                 |
| 45 |          |    |                                                                                 |
| 46 |          |    |                                                                                 |
| 47 |          |    |                                                                                 |
| 48 |          |    |                                                                                 |
| 49 |          |    |                                                                                 |

\*We strongly recommend reading this statement in conjunction with the CONSORT 2010 Explanation and Elaboration for important clarifications on all the items. If relevant, we also recommend reading CONSORT extensions for cluster randomised trials, non-inferiority and equivalence trials, non-pharmacological treatments, herbal interventions, and pragmatic trials. Additional extensions are forthcoming: for those and for up to date references relevant to this checklist, see [www.consort-statement.org](http://www.consort-statement.org).

For peer review only



**Pharmacist-led management of chronic pain in primary care: results from a randomised controlled exploratory trial**

|                                 |                                                                                                                                                                                                                                                                                                                                                                                                                                                                                                                                                                                                                                                               |
|---------------------------------|---------------------------------------------------------------------------------------------------------------------------------------------------------------------------------------------------------------------------------------------------------------------------------------------------------------------------------------------------------------------------------------------------------------------------------------------------------------------------------------------------------------------------------------------------------------------------------------------------------------------------------------------------------------|
| Journal:                        | <i>BMJ Open</i>                                                                                                                                                                                                                                                                                                                                                                                                                                                                                                                                                                                                                                               |
| Manuscript ID:                  | bmjopen-2012-002361.R1                                                                                                                                                                                                                                                                                                                                                                                                                                                                                                                                                                                                                                        |
| Article Type:                   | Research                                                                                                                                                                                                                                                                                                                                                                                                                                                                                                                                                                                                                                                      |
| Date Submitted by the Author:   | 25-Jan-2013                                                                                                                                                                                                                                                                                                                                                                                                                                                                                                                                                                                                                                                   |
| Complete List of Authors:       | Bruhn, Hanne; University of Aberdeen, Health Services Research Unit<br>Bond, Christine; University of Aberdeen,<br>Elliott, Alison; University of Aberdeen, General Practice and Primary Care<br>Hannaford, Phil; University of Aberdeen<br>Lee, Amanda; University of Aberdeen, Division of Applied Health Sciences<br>McNamee, Paul; University of Aberdeen<br>Smith, Blair; University of Dundee,<br>Watson, Margaret; University of Aberdeen, General Practice and Primary Care<br>Blyth, Annie; University of East Anglia, Norwich Medical School<br>Wright, David; University of East Anglia, Infection<br>Holland, Richard; University of East Anglia, |
| <b>Primary Subject Heading</b>: | General practice / Family practice                                                                                                                                                                                                                                                                                                                                                                                                                                                                                                                                                                                                                            |
| Secondary Subject Heading:      | General practice / Family practice, Health services research                                                                                                                                                                                                                                                                                                                                                                                                                                                                                                                                                                                                  |
| Keywords:                       | PAIN MANAGEMENT, PRIMARY CARE, Clinical trials < THERAPEUTICS                                                                                                                                                                                                                                                                                                                                                                                                                                                                                                                                                                                                 |
|                                 |                                                                                                                                                                                                                                                                                                                                                                                                                                                                                                                                                                                                                                                               |

SCHOLARONE™  
Manuscripts

only



## Title page

Pharmacist-led management of chronic pain in primary care: results from a randomised controlled exploratory trial

Hanne Bruhn, Christine M Bond, Alison M Elliott, Philip C Hannaford, Amanda J Lee, Paul McNamee, Blair H Smith, Margaret C Watson, Annie Blyth, Richard Holland, David Wright

Centre for Healthcare Randomised Trials, Health Services Research Unit, University of Aberdeen, 3<sup>rd</sup> floor Health Sciences Building, Foresterhill, Aberdeen, AB25 2ZD, UK Hanne Bruhn, Trial Manager

Centre of Academic Primary Care, Division of Applied Health Sciences, University of Aberdeen, Polwarth West Block, Foresterhill, Aberdeen, AB25 2ZD, UK, Christine M Bond, Professor of Primary Care: Pharmacy

Centre of Academic Primary Care, Division of Applied Health Sciences, University of Aberdeen, Polwarth West Block, Foresterhill, Aberdeen, AB25 2ZD, UK, Alison M Elliott, Senior Research Fellow

Centre of Academic Primary Care, Division of Applied Health Sciences, University of Aberdeen, Polwarth West Block, Foresterhill, Aberdeen, AB25 2ZD, UK, Philip C Hannaford, NHS Grampian Chair of Primary Care

Medical Statistics Team, Division of Applied Health Sciences, Polwarth Building, Foresterhill, Aberdeen, AB25 2ZD, UK, Amanda J Lee, Professor of Medical Statistics

Health Economics Research Unit, University of Aberdeen, Polwarth Building, Foresterhill, Aberdeen, AB25 2ZD, UK, Paul McNamee, Reader

Mackenzie Building, Kirsty Semple Way, Ninewells Hospital and Medical School, Dundee, DD2 4RB, UK, Blair H Smith, Professor of Population Science

Centre of Academic Primary Care, Division of Applied Health Sciences, University of Aberdeen, Polwarth West Block, Foresterhill, Aberdeen, AB25 2ZD, UK, Margaret C Watson, Senior Research Fellow

Norwich Medical School, Faculty of Medicine and Health Sciences, University of East Anglia, Norwich Research Park, Norwich, NR4 7TJ, UK, Annie Blyth, Research Associate

Norwich Medical School, Faculty of Medicine and Health Sciences, University of East Anglia, Norwich Research Park, Norwich, NR4 7TJ, UK, Richard Holland, Professor of Public Health Medicine

School of Pharmacy, University of East Anglia, Norwich Research Park, NR4 7TJ, UK, David Wright, Chair in Pharmacy Practice

1  
2 Correspondence to: Professor CM Bond c.m.bond@abdn.ac.uk, Centre of Academic Primary  
3 Care, Division of Applied Health Sciences, University of Aberdeen, Polwarth West Block,  
4 Foresterhill, Aberdeen, AB25 2ZD, UK  
5

6  
7 The Corresponding Author has the right to grant on behalf of all authors and does grant on behalf of all  
8 authors, [a worldwide licence](#) to the Publishers and its licensees in perpetuity, in all forms, formats and  
9 media (whether known now or created in the future), to i) publish, reproduce, distribute, display and  
10 store the Contribution, ii) translate the Contribution into other languages, create adaptations, reprints,  
11 include within collections and create summaries, extracts and/or, abstracts of the Contribution, iii)  
12 create any other derivative work(s) based on the Contribution, iv) to exploit all subsidiary rights in the  
13 Contribution, v) the inclusion of electronic links from the Contribution to third party material where-  
14 ever it may be located; and, vi) licence any third party to do any or all of the above.  
15  
16  
17  
18  
19  
20  
21  
22  
23  
24  
25  
26  
27  
28  
29  
30  
31  
32  
33  
34  
35  
36  
37  
38  
39  
40  
41  
42  
43  
44  
45  
46  
47  
48  
49  
50  
51  
52  
53  
54  
55  
56  
57  
58  
59  
60

## Abstract

### Objectives

To compare the effectiveness of pharmacist medication-review, with or without pharmacist prescribing, with standard care, for patients with chronic pain.

### Design

An exploratory randomised controlled trial.

### Setting

Six general practices with prescribing pharmacists in Grampian (3) and East Anglia (3).

### Participants

Patients on repeat prescribed pain medication (4815) were screened by GPs, and mailed invitations (1397). 196 were randomised and 180 (92%) completed. Exclusion criteria included: severe mental illness, terminally ill, cancer related pain, history of addiction

### Randomisation and intervention

Patients were randomised using a remote telephone service to: (i) pharmacist medication-review with face-to-face pharmacist prescribing; or (ii) pharmacist medication-review with feedback to GP and no planned patient contact; or (iii) treatment as usual (TAU). Blinding was not possible.

### Outcome measures

Primary outcomes were the Chronic Pain Grade (CPG) and the SF-12v2, together with Hospital Anxiety and Depression Scale (HADS). Outcomes were collected at 0, 3, and 6 months. Ethical approval was obtained.

### Results

In the prescribing arm (n=70) two patients were excluded/nine withdrew. In the review arm (n=63) one was excluded/three withdrew. In the TAU arm (n=63) four withdrew. Compared with baseline, patients had an improved CPG in the prescribing arm, 47.7% (21/44; p=0.003), and in the review arm, 38.6% (17/44; p=0.001), but not the TAU group, 31.3% (15/48; ns). The SF-12 PCS showed no effect in the prescribing or review arms but improvement in TAU

1  
2 (p=0.02). The SF-12 MCS showed no effect for the prescribing or review arms and deterioration  
3 in the TAU arm (p=0.002). HADS scores improved within the prescribing arm for Depression  
4 (p=0.022) and Anxiety (p=0.007), between groups (p=0.022 and p=0.045 respectively)  
5  
6  
7

## 8 Conclusion

9  
10 This is the first RCT of pharmacist-prescribing in the UK, and suggests there may be a benefit  
11 for patients with chronic pain. A larger trial is required.  
12

13  
14 Trial registration: [www.isrctn.org/ISRCTN06131530](http://www.isrctn.org/ISRCTN06131530). Medical Research Council funding.  
15  
16  
17

### 18 *Focus:*

- 19 • Chronic pain, (lasting >3 months) affects up to half the adult population, most  
20 of whom are primarily managed in primary care but prescribing is often sub-  
21 optimal.  
22
- 23 • Pharmacists now have prescribing rights but no published research has  
24 compared the effectiveness of their prescribing with that of GPs.  
25
- 26 • The ~~theory~~ hypothesis was that pharmacist advice (with or without pharmacist  
27 prescribing) would lead to better outcomes than usual care  
28

### 29 *Key messages:*

- 30 • The findings suggest [there may be](#) improved pain related outcomes for patients  
31 receiving pain related care from a pharmacist prescriber  
32
- 33 • A larger trial is called for.  
34

### 35 *Strengths and Limitations*

- 36 • This the first randomised controlled trial of pharmacist prescribing in the UK  
37 looking at patient reported clinical outcomes  
38
- 39 • The study was designed as an exploratory trial so no power calculation was  
40 done  
41  
42  
43  
44  
45  
46  
47  
48  
49  
50  
51  
52  
53  
54  
55  
56  
57  
58  
59  
60

## Introduction

Chronic pain (pain lasting more than three months) affects up to half the adult United Kingdom (UK) population, and is considered severely limiting in about 15% of cases (1). Recovery is uncommon with nearly 80% of those identified with chronic pain at baseline still reporting chronic pain four years later (2). It adversely affects many aspects of a person's physical and psychological health, and social and economic well being (3-6).

In the UK, most patients with chronic pain present, and are managed, in primary care (7). Although non-pharmacological treatments are available, these are accessed by few patients, with mixed success (e.g. (8-10)). Analgesics prescribed in primary care remain the mainstay of treatment (4), representing substantial workload and cost. Sub-optimal prescribing may lead to poor pain control and other adverse patient outcomes. One study found that the most common medications involved in adverse drug reaction-related emergency admissions involved non-steroidal anti-inflammatory drugs (NSAIDs) (11) which are commonly used to manage pain. Improved prescribing could result in better outcomes and remove the need for more costly, scarce, alternatives.

Pharmacists working in UK general practices are well-placed to improve pain pharmacotherapy because of their expertise in therapeutics, understanding of the poly-pharmacy regimens (12) frequently used in chronic pain management, and established relationships with other primary care colleagues. In the UK National Health Service (NHS), recent regulatory changes now allow accredited pharmacists (as well as some other health care professionals such as nurses) to prescribe prescription-only medicines (POMs) (13). Pharmacists can either be qualified as supplementary prescribers, in which case they operate within an agreed clinical management plan (CMP) in partnership with the doctor and patient, or as an independent prescriber, in which case they can either prescribe completely independently or within a CMP.

However, despite the increasing number of non-medical prescribers, including pharmacists, there has been no rigorous comparisons of the outcomes of non-medical versus GP prescribing. This information is needed to assess the clinical effectiveness of different care models.

This paper reports findings from an exploratory randomised controlled trial (RCT) comparing pharmacist medication review, with or without pharmacist prescribing, with standard care for

1 patients with chronic pain. Development of the trial was informed by earlier feasibility work  
2  
3 (14,15).  
4

5  
6 The *a priori* theory was that, in patients with chronic pain, pharmacist advice (with or without  
7  
8 pharmacist prescribing) would lead to better patient functioning and/or better pain control at  
9  
10 six months than treatment as usual (TAU).  
11

## 12 **Methods**

### 13 *Regulatory Issues*

14  
15 Ethical approval was granted by the National Research Ethics Service Committee – North of  
16  
17 Scotland (reference number 09/S0801/107). NHS Research and Development approval was  
18  
19 granted by NHS Grampian and East Norfolk & Waveney Research Governance Committees.  
20  
21 Patients gave informed consent before taking part.  
22  
23

### 24 *Design*

25  
26 An open, exploratory RCT in which patients were randomised to one of three study arms.  
27  
28 Participants were not blind to allocated treatment arm due to the nature of the intervention.  
29  
30

### 31 *Recruitment of practices and independent prescribing pharmacists*

32  
33 Practices in the Grampian Health Board area, Scotland (n=18) and East Anglia region of England  
34  
35 (n=4) known to have an attached Royal Pharmaceutical Society of Great Britain registered  
36  
37 independent pharmacist prescriber, were eligible to take part. From those indicating a  
38  
39 willingness to participate, convenience sampling was used to identify six general practices:  
40  
41 three in Grampian and three in East Anglia.  
42

### 43 *Patient inclusion and exclusion criteria*

44  
45 Patients registered with the recruited practices were eligible for inclusion if they were over 18  
46  
47 years of age, living in their own home, and receiving regular prescribed medication for pain.  
48  
49 Patients were identified by a computerised search (14) of the drug records of all individuals  
50  
51 registered with the practice, to identify those who had received either two or more acute  
52  
53 prescriptions, and/or one repeat prescription within the last 120 days, for an analgesic (British  
54  
55 National Formulary (BNF section 4.7) and/or non-steroidal anti-inflammatory medication  
56  
57 (NSAID) (BNF section 10.1.1). Medications which can be used for analgesia but whose primary  
58  
59 indication is not chronic pain (e.g. triptans, anti-epileptics or anti-depressants) were excluded  
60

1 as these drugs identify few additional eligible patients (16). In accordance with trial criteria,  
2 GPs excluded and recorded reasons for patients who had: a concomitant severe mental health  
3 problem or terminal illness; had suffered recent bereavement; had a known alcohol or drug  
4 addiction; suffered pain caused by cancer or other malignancy; were unable to give informed  
5 consent; other (unspecified) reasons.  
6  
7  
8  
9

#### 10 *Patient recruitment*

11 Eligible patients were sent an invitation pack (letter, information sheet, consent form) by  
12 practice staff between March and June 2010. Consent forms were returned directly to the  
13 researchers, who sent out a baseline questionnaire. Patients returning completed  
14 questionnaires were randomised by the researcher using a telephone randomisation service  
15 with a random number allocation which ensured allocation concealment. The allocation  
16 sequence was 1:1:1.  
17  
18  
19  
20  
21  
22  
23

#### 24 *Intervention*

25 All participating pharmacists took part in a two-day course updating them about pain  
26 management. As part of the training, participants defined and agreed the treatment algorithm  
27 they would all use.  
28  
29  
30  
31

32 'Prescribing' arm: Pharmacists invited patients to a face-to-face consultation. Prior to the  
33 consultation, pharmacists completed a paper-based medication review of each patient's  
34 medical record and patients were asked to complete a pain diary to inform the consultation. A  
35 pharmaceutical care plan was agreed between the pharmacist and the patient. The plan  
36 assessed and documented relevant past medical history and current conditions; known  
37 allergies and adverse drug reactions; relevant laboratory results; pain-related medications  
38 prescribed in the previous 10 years; current pain related prescription medications; current  
39 symptoms; lifestyle issues, including units of alcohol consumed per week; recommendations  
40 for changes to medication (if any); whether non-pharmaceutical treatments had been  
41 considered; and, any other relevant issues. Copies of the pain diary and pharmaceutical care  
42 plan are available from the authors on request. At the end of the consultation any required  
43 prescriptions for medicines were issued by the pharmacist. Due to Controlled Drug (CD)  
44 regulations in place at the time, prescribing for CDs was done using a supplementary  
45 prescribing Clinical Management Plan (17), rather than independent prescribing. Patients were  
46 followed up either by phone or face-to-face, at each pharmacist's discretion.  
47  
48  
49  
50  
51  
52  
53  
54  
55  
56  
57  
58  
59  
60

1  
2 'Review arm': The pharmacists conducted a paper-based medication review focussed on pain-  
3 related prescription medications, before creating a pharmaceutical care plan which detailed  
4 any recommendations for medication changes. The plan was passed to the patient's GP for  
5 implementation. The GPs were asked subsequently about actions taken as a result of the  
6 recommendations.  
7  
8  
9

10  
11 Treatment as usual (TAU): Patients received standard general practice care.  
12  
13

#### 14 *Outcome measures*

15  
16 There were two primary outcome measures: the Chronic Pain Grade (CPG) and the Medical  
17 Outcomes Study 12-item short form version 2 (SF-12v2). Use of both a pain specific and generic  
18 outcome measure was based on Initiative on Methods, Measurement, and Pain Assessment in  
19 Clinical Trials (IMMPACT) recommendations (18) and an earlier feasibility study (15).  
20  
21  
22  
23

24  
25 The CPG (19) is a seven item scale which assesses pain severity on two dimensions: disability  
26 and intensity. The scale classifies pain according to level of intensity and disability (I (low  
27 disability-low intensity) to IV (high disability-severely limiting)).  
28  
29  
30

31  
32 The SF-12v2 is a generic health and functioning scale (20), previously used in population-based  
33 studies of pain (21, 22). A Physical (PCS) and Mental Component Score (MCS) was calculated,  
34 ranging from 0 to 100; a higher score indicates better functioning.  
35  
36  
37  
38

39  
40 A secondary outcome measure was the Hospital Anxiety and Depression Scale (HADS) (23), a  
41 14-item screening instrument which identifies the possible and probable caseness of anxiety (7  
42 items (HADS-A)) and depression (7 items (HADS-D)); each item scored from 0 (not present) to 3  
43 (highly present). Standard thresholds and previously used labels (24) were applied (no  
44 depression/anxiety (0-7), mild (8-10), moderate (11-15) or severe (>15)).  
45  
46  
47  
48

#### 49 *Data collection*

##### 50 *Participant questionnaires*

51  
52 Questionnaires were posted to participants at baseline (pre-randomisation), and 3 and 6  
53 months post-randomisation (follow-up was conducted between July 2010 and January 2011).  
54  
55

56  
57 Up to two reminders were sent. Questionnaire content included the outcome measures  
58  
59  
60



1 described above together with items on: demographic status (baseline only); screening items  
2 to confirm eligibility (baseline only); duration of pain condition (baseline only); location of pain;  
3 Morisky Medication Adherence Scale 4 (MMAS-4) (25); participant satisfaction (11 statements  
4 derived from the feasibility study for the prescribing arm (3 months only) and additional  
5 comments by participants. The MMAS-4 provides a score of self-reported adherence to  
6 medication regimen. Scores range from 0 (low adherence) to 4 (high adherence).  
7  
8  
9

#### 10 11 12 *Follow-up interviews with staff*

13 Post-intervention, all pharmacists and all GPs in participating practices were invited to take part  
14 in semi-structured interviews, carried out face-to-face when possible, otherwise by telephone.  
15 Interviews were taped, transcribed verbatim and content analysis was carried out.  
16  
17  
18  
19

#### 20 21 *Sample size*

22 As this was an exploratory trial to estimate the effect size for a larger trial, no formal sample  
23 size calculation was possible (26). We aimed to recruit 30 participants per practice (excluding  
24 those recruited for training purposes) i.e. 180 in total. This was deemed sufficient to give  
25 reliable effect size estimates for the primary outcome measures of chronic pain grade or health  
26 status.  
27  
28  
29  
30  
31

#### 32 33 *Data management and analysis*

34 Data were entered into identical SPSS databases at each site and accuracy checks carried out  
35 on 10% before databases were merged. Descriptive statistics included means and standard  
36 deviations (SD) for normally distributed continuous data, medians (interquartile range (IQR))  
37 for skewed continuous data and percentages (n) for categorical data. Analysis was conducted  
38 on an intention-to-treat basis for participants with complete data on relevant measures using  
39 SPSS version 18.  
40  
41  
42  
43  
44  
45

46 Exploratory analyses for parametric data included the paired t-test for within-arm comparisons  
47 of mean difference between baseline and 6 months and one-way ANOVA for between arm  
48 comparisons of mean difference. For non-parametric data it included the Wilcoxon Signed  
49 Rank test for within-arm comparisons of median difference and the Kruskal Wallis test for  
50 between arm comparisons of median difference. Categorical data was analysed using the  
51 marginal homogeneity test for within-arm comparisons (with null hypothesis that the  
52 distribution of CPG grade or HADS group does not change between baseline and 6 month  
53  
54  
55  
56  
57  
58  
59  
60

1 follow-up) and the Chi-squared test for between arm comparisons; analyses reported here are  
2 based on 6 month follow-up data (other than for participant experiences). Within arm effect  
3 sizes, expressed in terms of a Pearson correlation coefficient (r) have been calculated using the  
4 formulas from Rosenthal (1991) (27). Effect sizes can be directly compared using Cohen's  
5 (1988) (28) criteria of  $r=0.1$  (small effect);  $r=0.3$  (medium effect) and  $r=0.5$  (large effect).  
6  
7  
8  
9

## 10 11 12 **Results**

### 13 *Response rates and demography*

14 Six of the seven practices approached participated. GPs excluded 12% (392/3281) of patients,  
15 mostly those with dementia. There was no statistically significant difference between  
16 participants and non-participants in terms of age, gender, and index of multiple deprivation.  
17 Figure 1 shows the flow of participants through the study. Overall, the consent rate was 25%  
18 (356/1397) and the recruitment rate was 14% (196/1397).  
19  
20  
21  
22  
23  
24

25 [INSERT FIGURE 1 HERE]  
26  
27

28 Eighty six percent of participants (251/289) returned baseline questionnaires, of whom 232  
29 were randomised (36 participants were randomised to one of the two intervention arms for  
30 training purposes and were not included in any further analysis and 19 were not included as  
31 recruitment target had been met). The overall follow-up rate at 3 months was 86%  
32 (161/187) and at 6 months 84% (152/180).  
33  
34  
35  
36  
37

38 As shown in Table 1, groups were similar at baseline for demographic and socioeconomic  
39 variables and pain data. Most participants were married, Caucasian and female, older (mean  
40 (SD) age 65 (12.6) years), had an annual income of <£25,000 and had suffered from pain for at  
41 least five years. Most (57%;103/181) reported being fully adherent to their medication  
42 regimen (MMAS-4, median 4.0 (IQR 3.0- 4.0)) (15 missing MMAS scores).  
43  
44  
45  
46

47 [INSERT TABLE 1 HERE]  
48  
49

50 In the prescribing arm, 78% (53/68) attended an initial prescribing consultation, 31 had at least  
51 one planned follow-up (of which 34/37 were conducted by phone) and 130 recommendations  
52 were made for 92% (49/53) of participants seen. Examples are shown in Box 1. The median  
53 time taken for the note-based record review was 35 minutes (IQR 20.0, 45.0), the consultation  
54  
55  
56  
57  
58  
59  
60

1 was 30 minutes (IQR 20.0, 40.0), careplan preparation 10 minutes (IQR 10.0, 20.0) and median  
2 duration of follow-ups was 10 minutes (IQR 5.0- 15.0).  
3  
4

5  
6 [INSERT BOX 1 HERE]  
7

8  
9 In the review arm 97% (60/62) of participants' records were reviewed (note there was one post  
10 randomisation exclusion) for whom 197 recommendations were made. Where GP feedback  
11 was provided (n=48), they generally agreed with pharmacists' recommendations, which were  
12 fully implemented for 20 participants (two by the pharmacist following request by GP), partially  
13 for 19 participants and not at all for nine participants. The median time taken for the note-  
14 based record review was 30 minutes (IQR 24.3, 45.0), and careplan preparation was 10  
15 minutes (IQR 5.0, 20.0).  
16  
17  
18  
19  
20  
21

#### 22 23 *Clinical outcome measures*

24 Table 2 shows the mean (SD) or median (IQR) of the CPG for each arm at baseline and 6 month  
25 follow-up. Table 3 shows the SF-12 scores and Table 4 shows the HADS-A and HADS-D results.  
26  
27  
28

29  
30 [INSERT TABLE 2,3,4, HERE]  
31

32 In the prescribing arm, there was a statistically significant within arm improvement for the CPG  
33 intensity (p=0.002, effect size (r)=0.45) and disability (p=0.003, effect size (r)=0.43) subscales,  
34 and between arms on the intensity sub-scale (p=0.02), but not the disability subscale (p=0.55)  
35 (Table 2). There was a significant within-arm improvement in overall CPG grade in the  
36 prescribing (p=0.003) and review arm (p=0.001), but not in the TAU arm. The SF-12 Physical  
37 Component Score showed a statistically significant within arm improvement in the TAU arm  
38 (p=0.02, effect size (r)=0.35) (Table 3), but not between trial arms. The SF-12 Mental  
39 Component Score showed a statistically significant deterioration in the TAU arm (p=0.002,  
40 effect size (r)=0.45)(Table 3), as did the HADS-D (p=0.03, Table 4). Analysis was also carried out  
41 on the non-categorised HADS scores which showed a statistically significant improvement  
42 within the prescribing arm for Depression (p=0.022) and Anxiety (p=0.007). These were both  
43 significant between groups (p=0.022 and p=0.045 respectively) (Table 5).  
44  
45  
46  
47  
48  
49  
50  
51  
52  
53

#### 54 *Acceptability of the pharmacist prescribing intervention*

55 All six pharmacists and 56% of the GPs (23/41) were interviewed. All pharmacists and most GPs  
56 were positive about the intervention, although some GPs suggested that the pharmacists'  
57  
58  
59  
60

1 recommendations had been minor and questioned the cost-effectiveness of the service.  
2  
3 Patient participants were generally positive about the pharmacist prescribing service although  
4  
5 some concerns were identified, as illustrated by the quotes shown in Box 2.  
6  
7

8 [INSERT BOX 2 HERE]  
9

## 10 Discussion

### 11 *Principal findings*

12 This exploratory RCT of pharmacist-led management of patients with chronic pain suggests that  
13  
14 pharmacist prescribing (and possibly pharmacist review alone) may be effective in improving  
15  
16 pain-related outcomes and be acceptable to both patients and most professionals. There was  
17  
18 an indication of a positive effect on emotional health, but no measurable effect on general  
19  
20 health.  
21  
22

### 23 *Strengths and weaknesses*

24 This was the first RCT to assess clinical and humanistic outcomes after pharmacist prescribing  
25  
26 for any clinical condition compared to usual GP care, and the first RCT to specifically assess  
27  
28 pharmacist-led management of chronic pain, compared with usual GP care. It was based on  
29  
30 extensive development and feasibility work (14,15) in line with MRC framework for  
31  
32 development and evaluation of complex interventions (29). A range of validated outcome  
33  
34 measures was included, as well as a parallel qualitative process evaluation which assessed  
35  
36 satisfaction and acceptability. The inclusion of six practices and their associated pharmacists  
37  
38 from both Scotland and England increased the generalisability of the findings. Pharmacists  
39  
40 received formal training and agreed and used a common treatment algorithm which should  
41  
42 have increased standardisation of treatment. The preponderance of females (overall 62%) and  
43  
44 average age of 65 years reflects the wider chronic pain population (1) as does the distribution  
45  
46 of pain site (30, 31,)  
47

48 There were, however limitations. Although high follow-up response rates were achieved at  
49  
50 both three (86%) and six months (85%) only 25% of eligible patients entered the trial. This low  
51  
52 initial consent rate is in line with other studies (32, 33), but may cause unknown biases  
53  
54 including problems of generalisability, as does the solely Caucasian ethnicity. Concerns  
55  
56 identified by participants during the formal feedback e.g. having too many people involved in  
57  
58 one's care may have contributed to poor response rates and rewording of participant  
59  
60

1 recruitment documentation to reassure participants of the role of the pharmacist could  
2 address this. More participants withdrew in the prescribing arm compared with the other two  
3 arms, which might be attributed to the need for an additional practice visit. The study was an  
4 exploratory trial so no formal power calculation was undertaken. However, because there were  
5 no published MIDs available to estimate effect size for the outcomes in this population, it was important  
6 to present the actual clinical magnitude of change in outcome at 6 months alongside a statistical  
7 assessment of this change (p-value). This allows an assessment of both clinical and statistical  
8 significance simultaneously with the caveat that this is an exploratory study. With around 50 patients  
9 per arm, this was deemed sufficient numbers to examine the change in outcome measures with  
10 appropriate within and between group univariate statistical tests. Due to the nature of the  
11 intervention, no participants were blind to their group allocation, and so some outcomes,  
12 especially the qualitative components, may have been affected by social desirability bias.

13  
14  
15  
16  
17  
18  
19  
20  
21  
22  
23  
24 Our main outcome measures were self-reported, but this is the norm in pain studies as pain is a  
25 subjective experience (18). Furthermore we do not know how important the observed  
26 differences were to participants. Following precedents set in previous research (25), and  
27 because there is no consensus on an alternative measure (34) we used the HADS as a tool to  
28 classify people by severity of depression and anxiety. However it is strictly a screening tool, and  
29 the four levels of severity have not been formally validated. We therefore also compared  
30 outcomes using it as a continuous scale.

### 31 *Relationship with other studies*

32 This study is important because no other RCT has evaluated pharmacist prescribing and few  
33 studies, and importantly no RCTs, have evaluated pharmacist interventions for pain. In  
34 pharmacist prescribing most research has focussed on reported experiences of professionals  
35 and patients, and not used validated outcome measures. Yet pharmacist prescribing is now  
36 widely practised. For pain, there have been a few small studies. Briggs et al (2008) (35)  
37 conducted a small before-and-after evaluation (involving 65 patients) of a nurse and  
38 pharmacist-led chronic pain clinic in primary care. Pain intensity Visual Analogue Scale scores  
39 reduced significantly over six months. Another evaluation of 26 patients using a medication  
40 review service provided jointly by a physiotherapist and pharmacist in the UK, reported  
41 improvement in pain control for 88% of patients (36).

1  
2 The CPG was found to show a graded effect across the three arms, showing discrimination with  
3 both direction and strength of improvement, suggesting maximum benefit for those in the  
4 pharmacist prescribing arm. However, the reduction in overall score appears to be mediated by  
5 a change in the intensity of pain subscale rather than in pain-related disability. The effect size  
6 of 0.45 suggests this could be an important difference. In contrast, the SF-12, a measure of  
7 general health and functionality showed no significant difference between intervention arms,  
8 reflecting either no effect or or lack of power to detect an effect.  
9  
10  
11  
12  
13

14  
15 Whilst most participants in this study were already within the normal range on the HADS scale,  
16 and therefore had minimal chance of improvement, there were nonetheless suggestions of  
17 better outcomes in participants in the prescribing arm. Including a range of instruments is in  
18 line with IMMPACT recommendations (37), which state that focus should be on the whole  
19 person, not just about pain. However, this needs to be balanced with minimising participant  
20 burden.  
21  
22  
23  
24

#### 25 26 *Explanations, implications, and future research*

27  
28 The number of pharmacists' recommendations per participant was higher in the review arm  
29 than in the prescribing arm. This might seem contradictory to the possible greater benefit  
30 found in the prescribing arm. However, in the prescribing arm pharmacists met the participant  
31 and may have more readily identified and dismissed suggestions previously tried. The interview  
32 feedback highlighted that some recommendations for change, whilst sensible, had been tried  
33 already. This might also be the reason why there were only 60% of pharmacist  
34 recommendations with which the GP fully agreed. Self-reported adherence to medication at  
35 baseline was good. Despite this, the pharmacists still improved pain outcomes in the  
36 prescribing arm. This could have been due to changes in medications and/or participant  
37 education about optimal timing for administration of analgesic medicines. Further research is  
38 needed to confirm the beneficial effect of pharmacist prescribing and its sustainability.  
39  
40  
41  
42  
43  
44  
45  
46  
47

#### 48 **Conclusion**

49  
50 Our results suggest that pharmacist prescribing (and possibly pharmacist review alone) for  
51 patients with chronic pain is feasible, acceptable and may lead to improvements in pain and  
52 other measures. A larger fully-powered trial is now needed to confirm these findings.  
53  
54

#### 55 56 **Data sharing statement**

1  
2 Consent was not obtained from participants for data sharing; the presented data are  
3 anonymised and there is no risk of individual identification. Requests for data should be made to  
4 the contact author who will provide this in a format in which risk of patient identification will be  
5 minimal.  
6  
7

### 8 9 **Conflict of interest statement**

10 All authors have completed the Unified Competing Interest form at [www.icmje.org/coi\\_disclosure.pdf](http://www.icmje.org/coi_disclosure.pdf)  
11 (available on request from the corresponding author) and declare: no support from any organisation for  
12 the submitted work; no financial relationships with any organisations that might have an interest in the  
13 submitted work in the previous 3 years; no other relationships or activities that could appear to have  
14 influenced the submitted work.  
15  
16  
17  
18

### 19 **Authors' contributions**

20 HB and CB drafted the manuscript.  
21

22 All authors:

- 23  
24  
25  
26  
27 1) made substantial contributions to conception and design, or acquisition of data, or analysis and  
28 interpretation of data;  
29  
30  
31 2) were involved in drafting the manuscript or revising it critically for important intellectual content; and  
32  
33  
34 3) have given final approval of the version to be published.  
35

### 36 **Acknowledgements**

37 We thank the participating patients, practices and pharmacists. We would also like to thank  
38 Kirsten Harrild (Medical Statistics, UOA) for statistical support. Rick Adams (School of  
39 Pharmacy, UEA) helped design and deliver the pharmacist training and Lesley Thomson (NHS  
40 Grampian) helped design the pharmacist data collection forms. The patient postal  
41 questionnaire was based on work by Nicola Cooper and the Norfolk Arthritis Register (NOAR)  
42 research team. The Pharmacy-Led Management of Chronic Pain Study Team acknowledges the  
43 financial support of NHS Research Scotland (NRS), through Scottish Primary Care Research  
44 Network Northeast. The work was conducted as part of the Aberdeen Pain Research  
45 Collaboration. The project was funded by the Medical Research Council. They had no further  
46 involvement in any aspect of study conduct; all researchers were independent of the funding  
47 body.  
48  
49  
50  
51  
52  
53  
54  
55  
56  
57  
58  
59  
60

1  
2 All authors had access to all of the study data and can take responsibility for the integrity of the  
3 data and the accuracy of the data analysis.  
4

## 5 6 **References**

- 7  
8 (1) Elliott AM, Smith BH, Penny KI, Smith WC, Chambers WA. The epidemiology of chronic pain  
9 in the community. *Lancet* 1999;354:1248-1252.  
10  
11 (2) Elliott AM, Smith BH, Hannaford P, Smith WC, Chambers WA. The course of chronic pain in  
12 the community: results of a 4-year follow-up study. *Pain* 2002;99:299-307.  
13  
14 (3) Becker N, Bondegaard Thomsen A, Olsen AK, Sjøgren P, Bech P, Eriksen J. Pain epidemiology  
15 and health related quality of life in chronic non-malignant pain center patients referred to  
16 a Danish multidisciplinary. *Pain* 1997;73:393-400.  
17  
18 (4) Breivik H, Collett B, Ventafridda V, Cohen R, Gallacher D. Survey of chronic pain in Europe:  
19 prevalence, impact on daily life, and treatment. *Eur J Pain* 2006;10:287-333.  
20  
21 (5) Gureje O, Von Korff M, Simon GE, Gater R. Persistent pain and well-being: a World Health  
22 Organization Study in Primary Care. *JAMA* 1998;280:147-151.  
23  
24 (6) Magni G, Marchetti M, Moreschi C, Merskey H, Luchini SR. Chronic musculoskeletal pain and  
25 depressive symptoms in the National Health and Nutrition Examination. I. Epidemiologic  
26 follow-up study. *Pain* 1993;53:163-168.  
27  
28 (7) Sullivan MD, Turner JA, Romano J. Chronic pain in primary care: identification and  
29 management of psychological factors. *J Fam Pract* 1991;32:193-199.  
30  
31 (8) Green S, Buchbinder R, Hetrick SE. Physiotherapy interventions for shoulder pain. *Cochrane*  
32 *Database of Syst Rev* 2010(9):Art. No.: CD004258. DOI: 10.1002/14651858.CD004258.  
33  
34 (9) Eccleston C, Williams, A. C. D. C., Morley S. Psychological therapies for the management of  
35 chronic pain (excluding headache)  
36 in adults. *Cochrane Database Syst Rev* 2009 Apr 15;(2):CD007407. DOI:  
37 10.1002/14651858.CD007407.pub2.  
38  
39 (10) Haetzman M, Elliott AM, Smith BH, Hannaford P, Chambers WA. Chronic pain and the use  
40 of conventional and alternative therapy. *Family Practice* 2003;20(2):147-154.  
41  
42 (11) Pirmohamed M, James S, Meakin S, Green C, Scott AK, Walley TJ, et al. Adverse drug  
43 reactions as cause of admission to hospital: prospective analysis of 18 820 patients. *BMJ*  
44 2004;329:15.  
45  
46 (12) Krska J, Cromarty JA, Arris F, Jamieson D, Hansford D, Duffus PR, et al. Pharmacist-led  
47 medication review in patients over 65: a randomized, controlled trial in primary care. *Age and*  
48 *Ageing* 2001;30:205-211.  
49  
50  
51  
52  
53  
54  
55  
56  
57  
58  
59  
60



1  
2 (13) Department of Health. Improving patients' access to medicines: A guide to implementing  
3 nurse and pharmacist independent prescribing within the NHS England. Department of Health  
4 2006.

5  
6 (14) McDermott ME, Smith BH, Elliott AM, Bond CM, Hannaford P, Chambers WA. The use of  
7 medication for chronic pain in primary care, and the potential for intervention by practice-  
8 based pharmacist. *Family Practice* 2006;23:46-52.

9  
10 (15) Bruhn H, Bond CM, Elliott AM, Hannaford PC, Lee AJ, McNamee P, et al. Developing an RCT  
11 of general practice-based, pharmacist-led, management of chronic pain: the PIPPC study. *IJPP*  
12 2010;18(Supplement 2).

13  
14 (16) Smith BH, Read JRM, Chambers WAC, Watt B, Grimshaw JM. Researching chronic pain:  
15 identification of a community based sample. *The Pain Clinic* 1996;9:73-76.

16  
17 (17) Department of Health. Supplementary prescribing by nurses and pharmacists within the  
18 NHS in England: A guide for implementation. Department of Health 2003.

19  
20 (18) Turk DC, Dworkin RH, Allen RR, Bellamy N, Brandenburg N, Carr DB, et al. Core outcome  
21 domains for chronic pain clinical trials: IMMPACT recommendations. *Pain* 2003 12;106(3):337-  
22 345.

23  
24 (19) Von Korff M, Ormel J, Keefe FJ, Dworkin SF. Grading the severity of chronic pain. *Pain*  
25 1992;50:133-149.

26  
27 (20) Ware JE, Kosinski M, Turner-Bowker DM, Sundaram M, Gandek B, Maruish ME. User's  
28 Manual for the SF-12v2 Health Survey. Second edition ed.: QualityMetric, Incorporated, 2009;  
29 2009.

30  
31 (21) Nicholl BI, Macfarlane GJ, Davies KA, Morriss R, Dickens C, McBeth J. Premorbid  
32 psychosocial factors are associated with poor health-related quality of life in subjects with new  
33 onset of chronic widespread pain - results from the EPIFUND study. *Pain* 2009;141:119-126.

34  
35 (22) Carmona L, Ballina J, Gabriel R, Laffon A. The burden of musculoskeletal diseases in the  
36 general population of Spain: results from a national survey. *Ann Rheum Dis* 2001;60:1040-1045.

37  
38 (23) Zigmond AS, Snaith RP. The hospital anxiety and depression scale. *Acta Psychiatr Scand*  
39 1983 Jun;67(6):361-370.

40  
41 (24) Snaith RP, Zigmond AS. HADS: Hospital Anxiety and Depression Scale. Windsor: NFER  
42 Nelson; 1994.

43  
44 (25) Morisky DE, Green LW, Levine DM. Concurrent and predictive validity of a self-reported  
45 measure of medication adherence. *Med Care* 1986 Jan;24(1):67-74.

46  
47 (26) Lancaster GA, Dood S, Williamson PR. Design and analysis of pilot studies:  
48 recommendations for good practice. *J Eval Clin Pract* 2004;10(2):307-312.

- 1  
2 (27) Rosenthal R. Meta-analytic procedures for social research (revised). Newbury Park, CA.  
3 Sage 1991.  
4
- 5 (28) Cohen J. Statistical power analysis for the behavioural sciences (2<sup>nd</sup> edition). New York.  
6 Academic Press. (29) Craig P, Dieppe P, Macintyre S, Michie S, Nazareth I, Petticrew M.  
7 Developing and evaluating complex interventions: the new Medical Research Council guidance.  
8 BMJ 2008;337:a1655.  
9
- 10 (30) Magni M, Caldieron C, Rigatti-Luchini S, Merskey H. Chronic musculo-skeletal pain and  
11 depressive symptoms in the general population. An analysis of the 1st National Health and  
12 Nutrition Examination Survey data. Pain 1990; 43: 299-307  
13
- 14 (31) Gureje O, Von Korff M, Simon GE, Gater R. Persistent pain and well-being. A World Health  
15 Organization study in primary care. Journal of the American Medical Association 1998; 280:  
16 147-151.  
17
- 18 (32) Community Pharmacy Medicines Management Project Evaluation Team. The MEDMAN  
19 study: a randomized controlled trial of community pharmacy-led medicines management for  
20 patients with coronary heart disease. Family Practice 2007;24:189-200.  
21
- 22 (33) Treweek S, Mitchell E, Pitkethly M, Cook J, Kjeldstrøm M, Johansen M, et al. Strategies to  
23 improve recruitment to randomised controlled trials. Cochrane Database Syst Rev  
24 2010;(4):MR000013 2011.  
25
- 26 (34) Cameron IM, Cardy A, Crawford JR, du Toit Schalk W, Hay S, Lawton K, et al. Measuring  
27 depression severity in general practice: discriminatory performance of the PHQ-9, HADS-D, and  
28 BDI-II. Br J Gen Pract 2011;61:e419-e426(8).  
29
- 30 (35) Briggs M, Closs SJ, Marczewski K, Barratt J. A feasibility study of a combined  
31 nurse/pharmacist-led chronic pain clinic in primary care. Qual Prim Care 2008;16:91-94.  
32
- 33 (36) Anonymous. Pharmacist and physiotherapist-led community outreach pain programme  
34 improve quality of life. The Pharmaceutical Journal 2005;275:14.  
35
- 36 (37) Turk DC, Dworkin RH, Revicki D, Harding G, Burke LB, Cella D, et al. Identifying important  
37 outcome domains for chronic pain clinical trials: An IMMPACT survey of people with pain.  
38 2008;137:276-285.  
39  
40  
41  
42  
43  
44  
45  
46  
47  
48  
49  
50  
51  
52  
53  
54  
55  
56  
57  
58  
59  
60

Figure 1: CONSORT Flow Diagram

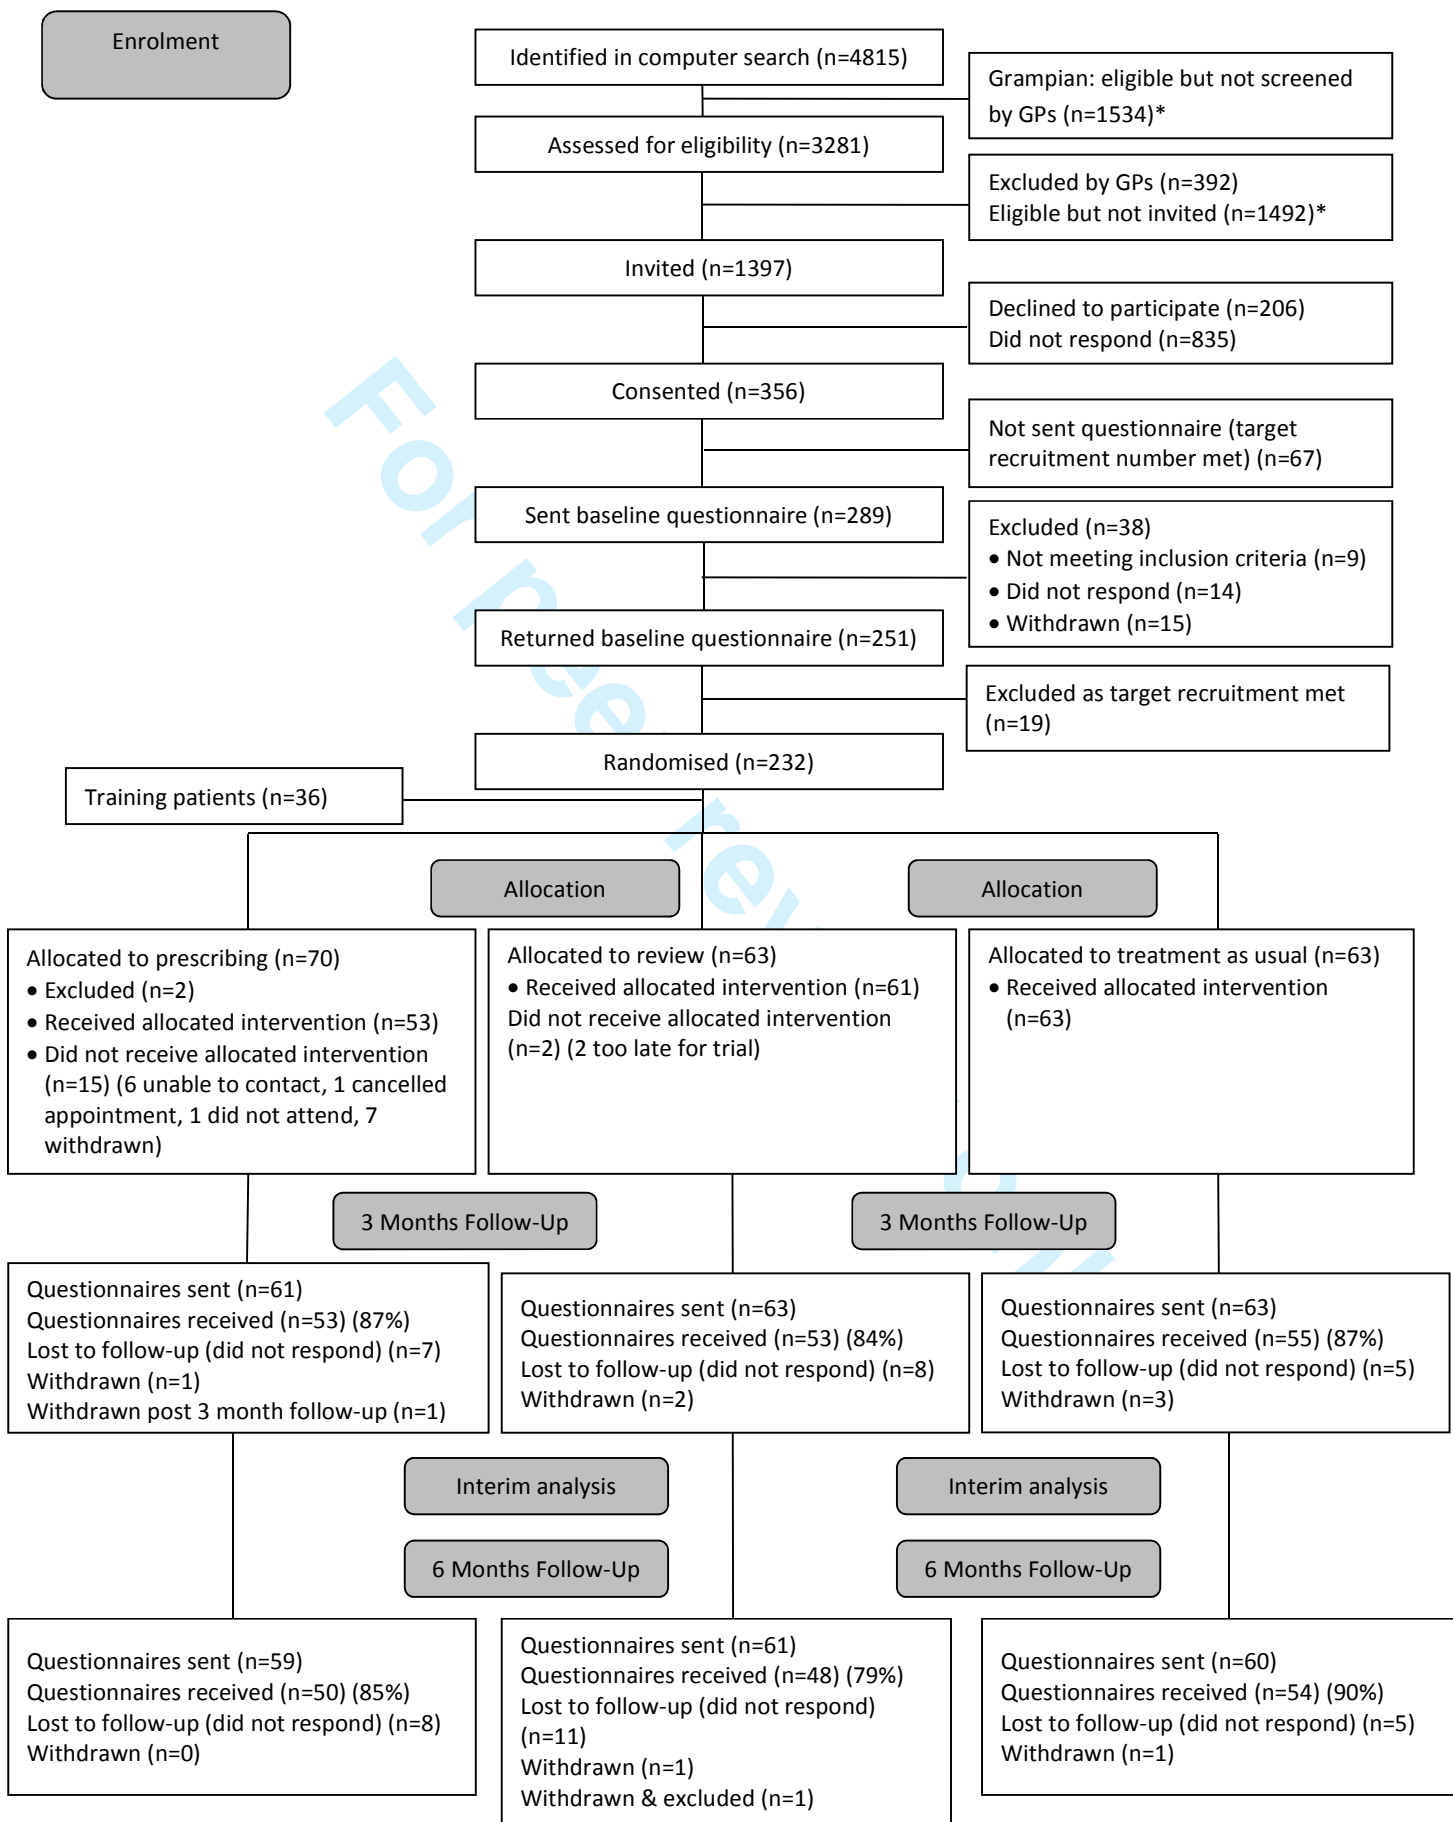

1  
2 \*In the **Grampian Health Board area**, on the basis of response rates in the earlier feasibility study (241  
3 screened patients resulted in 22 recruited) only a random sample of eligible participants were screened  
4 (15). In East Anglia all eligible patients were screened.  
5  
6  
7  
8  
9  
10  
11  
12  
13  
14  
15  
16  
17  
18  
19  
20  
21  
22  
23  
24  
25  
26  
27  
28  
29  
30  
31  
32  
33  
34  
35  
36  
37  
38  
39  
40  
41  
42  
43  
44  
45  
46  
47  
48  
49  
50  
51  
52  
53  
54  
55  
56  
57  
58  
59  
60

For peer review only

**Table 1:** Baseline demographic, socio-economic and pain data of patients by study arm, prescribing, review and treatment as usual (TAU)

|                                           | Prescribing* | Review*     | TAU*        |
|-------------------------------------------|--------------|-------------|-------------|
|                                           | (n = 68)     | (n = 62)    | (n = 63)    |
| Age: mean (SD)                            | 66.1 (12.1)  | 65.7 (14.2) | 64.9 (11.6) |
| Missing                                   | 1            | 1           | 0           |
| Gender (% female)                         | 54.4 (37)    | 74.2 (46)   | 58.7 (37)   |
| <i>Marital status</i>                     |              |             |             |
| Married                                   | 43           | 30          | 41          |
| Single                                    | 6            | 6           | 3           |
| Divorced/widow                            | 10           | 21          | 13          |
| Other                                     | 6            | 4           | 6           |
| Missing                                   | 3            | 1           | 0           |
| <i>Highest educational level achieved</i> |              |             |             |
| No qualifications                         | 30           | 27          | 21          |
| O grade or equivalent                     | 12           | 6           | 14          |
| Higher/A-level/NVQ3/SVQ3                  | 6            | 8           | 7           |
| Tertiary education/NVQ4/NVQ5              | 18           | 17          | 14          |
| Other                                     | 2            | 1           | 4           |
| Missing                                   | 0            | 3           | 3           |
| <i>Employment status</i>                  |              |             |             |
| Employed                                  | 16           | 14          | 9           |
| Unemployed                                | 3            | 5           | 1           |
| Retired                                   | 38           | 35          | 34          |
| Long term sick/disabled                   | 7            | 5           | 9           |
| Other                                     | 3            | 2           | 7           |
| Missing                                   | 1            | 1           | 3           |
| <i>Household annual income before tax</i> |              |             |             |
| Less than £9,999                          | 13           | 15          | 10          |
| £10,000 - £14,999                         | 14           | 18          | 22          |
| £15,000 - £24,999                         | 14           | 12          | 12          |
| £25,000 – or more                         | 22           | 11          | 8           |
| Missing                                   | 5            | 6           | 11          |
| <i>Ethnic group</i>                       |              |             |             |
| Caucasian                                 | 67           | 62          | 61          |
| Other                                     | 1            |             |             |
| Missing                                   | 0            | 0           | 2           |
| <i>Pain duration</i>                      |              |             |             |
| < 1 year                                  | 3            | 2           | 4           |
| 1 – 3 years                               | 12           | 12          | 7           |
| 3 – 5 years                               | 10           | 13          | 9           |
| 5 – 10 years                              | 17           | 13          | 15          |
| > 10 years                                | 26           | 22          | 28          |
| <i>Pain localisation (% , n)</i>          |              |             |             |
| Back                                      | 27.9 (19)    | 32.3 (20)   | 20.6 (13)   |
| Neck, shoulders                           | 7.4 (5)      | 9.7 (6)     | 9.5 (6)     |
| Limbs or hips                             | 42.6 (29)    | 30.6 (19)   | 50.8 (32)   |
| Other                                     | 8.8 (6)      | 4.8 (3)     | 7.9 (5)     |
| Missing                                   | 9            | 14          | 7           |

\*Denominator based on numbers allocated to the specific arms, minus any exclusions due to protocol violations.

**Table 2:** Mean (standard deviation, SD) CPG intensity, median (interquartile range, IQR) CPG disability, and count CPG grade at baseline, 6 months follow-up and difference between the two assessment points for each arm, prescribing, review and treatment as usual (TAU). P-values for within and between arm differences are also reported.

|                                   | Prescribing |                   | Review |                    | TAU |                   | P (between groups <sup>***</sup> ) |
|-----------------------------------|-------------|-------------------|--------|--------------------|-----|-------------------|------------------------------------|
|                                   | n*          | Mean (SD)         | n*     | Mean (SD)          | n*  | Mean (SD)         |                                    |
| Baseline CPG intensity            | 47          | 66.1 (16.0)       | 45     | 68.4 (17.6)        | 54  | 65.4 (18.0)       |                                    |
| 6 month follow-up CPG intensity   |             | 58.1 (19.5)       |        | 67.4 (21.7)        |     | 65.6 (19.6)       |                                    |
| Difference CPG intensity          |             | -8.0 (16.3)       |        | -1.0 (16.0)        |     | 0.2 (14.9)        |                                    |
| P (within groups <sup>**</sup> )  |             | 0.002             |        | 0.67               |     | 0.93              | 0.02                               |
| Effect size (r)                   |             | 0.45              |        | 0.07               |     | 0.01              |                                    |
|                                   |             | Median [IQR]      |        | Median [IQR]       |     | Median [IQR]      |                                    |
| Baseline CPG disability           | 48          | 60.0 [30.0; 75.8] | 46     | 66.7 [45.0; 80.0]  | 53  | 56.7 [36.7; 80.0] |                                    |
| 6 Month follow-up CPG disability  |             | 40.0 [20.0; 60.0] |        | 53.3 [29.2; 73.3]  |     | 50.0 [25.0; 80.0] |                                    |
| Difference CPG disability         |             | -8.3 [-23.3; 0.0] |        | -3.3 [-16.7; 10.0] |     | -3.3 [-21.7; 5.0] |                                    |
| P (within groups <sup>**</sup> )  |             | 0.003             |        | 0.15               |     | 0.05              | 0.55                               |
| Effect size (r)                   |             | 0.43              |        | 0.20               |     | 0.26              |                                    |
| Baseline CPG grade                | 44          | Count (%)         | 44     | Count (%)          | 48  | Count (%)         |                                    |
|                                   | I           | 5 (11.4)          |        | 3 (6.8)            |     | 5 (10.4)          |                                    |
|                                   | II          | 16 (36.4)         |        | 9 (20.5)           |     | 13 (27.1)         |                                    |
|                                   | III         | 7 (15.9)          |        | 10 (22.7)          |     | 13 (27.1)         |                                    |
|                                   | VI          | 16 (36.4)         |        | 22 (50.0)          |     | 17 (35.4)         |                                    |
| 6 month follow-up CPG grade       |             |                   |        |                    |     |                   |                                    |
|                                   | I           | 13 (29.5)         |        | 8 (18.2)           |     | 6 (12.5)          |                                    |
|                                   | II          | 13 (29.5)         |        | 15 (34.1)          |     | 17 (35.4)         |                                    |
|                                   | III         | 8 (18.2)          |        | 8 (18.2)           |     | 11 (22.9)         |                                    |
|                                   | IV          | 10 (22.7)         |        | 13 (29.5)          |     | 14 (29.2)         |                                    |
| Difference CPG grade              |             |                   |        |                    |     |                   |                                    |
|                                   | ≤-1         | 21 (47.7)         |        | 17 (38.6)          |     | 15 (31.2)         |                                    |
|                                   | 0           | 17 (38.6)         |        | 25 (56.8)          |     | 25 (52.1)         |                                    |
|                                   | ≥1          | 6 (13.6)          |        | 2 (4.5)            |     | 8 (2.1)           | 0.16                               |
| P (within groups <sup>***</sup> ) |             | 0.003             |        | 0.001              |     | 0.17              |                                    |

\*Number of participants in each group who completed the appropriate part of the CPG at both baseline and follow-up.

\*\* From paired t-test, Wilcoxon signed rank test or marginal homogeneity test as appropriate

\*\*\* From ANOVA on mean difference, Kruskal-Wallis on median difference or chi-squared test on difference in CPG grade as appropriate

**Table 3:** Mean (standard deviation, SD) SF12 Physical Component Score (PCS) and median (interquartile range, IQR) Mental Component Score (MCS) at baseline and 6 month follow-up and difference between the two assessment points for each arm, prescribing, review and treatment as usual (TAU). Within and between arm p-values are also reported.

|                                  | Prescribing |                   | Review |                   | TAU |                   | P (between groups <sup>***</sup> ) |
|----------------------------------|-------------|-------------------|--------|-------------------|-----|-------------------|------------------------------------|
|                                  | n*          | Mean (SD)         | n*     | Mean (SD)         | n*  | Mean (SD)         |                                    |
| Baseline SF12 PCS                | 41          | 33.5 (10.8)       | 43     | 32.59(11.38)      | 45  | 29.60 (9.71)      | 0.75                               |
| 6 month follow-up SF12 PCS       |             | 35.3 (10.8)       |        | 34.62 (11.26)     |     | 32.59 (9.14)      |                                    |
| Difference SF12 PCS              |             | 1.8 (7.5)         |        | 2.02 (7.56)       |     | 2.99 (8.11)       |                                    |
| P (within groups <sup>**</sup> ) |             | 0.12              |        | 0.09              |     | 0.02              |                                    |
| Effect size (r)                  |             | 0.24              |        | 0.26              |     | 0.35              |                                    |
|                                  |             | Median [IQR]      |        | Median (IQR)      | 45  | Median (IQR)      |                                    |
| Baseline SF12 MCS                | 42          | 52.4 [42.0; 58.8] | 43     | 47.9 [38.5; 59.9] |     | 51.5 [41.3; 60.7] | 0.04                               |
| 6 month follow-up SF12 MCS       |             | 49.6 [42.8; 58.1] |        | 47.9 [38.9; 56.2] |     | 44.7 [37.6; 55.8] |                                    |
| Difference SF12 MCS              |             | -0.4 [-3.7; 6.0]  |        | -1.2 [-6.6; 4.2]  |     | -3.0 [-10.0; 1.3] |                                    |
| P (within groups <sup>**</sup> ) |             | 0.64              |        | 0.37              |     | 0.002             |                                    |
| Effect size (r)                  |             | 0.07              |        | 0.14              |     | 0.46              |                                    |
|                                  |             |                   |        |                   |     |                   |                                    |

\* Number of participants in each group who completed the appropriate part of the SF-12 at both baseline and follow-up.

\*\* From paired t-test or Wilcoxon signed rank test as appropriate

\*\*\* From ANOVA on mean difference or Kruskal-Wallis test on median difference as appropriate

**Table 4:** The HADS-Depression (HADS-D) and HADS-Anxiety (HADS-A) count of patients according to severity (normal, mild, moderate or severe) and the difference in severity category between the two assessment points for each arm, prescribing, review and treatment as usual (TAU). Within and between arm p-values are also reported.\*

|                          | n  | Prescribing | n  | Review    | n  | TAU       | P (between groups***) |
|--------------------------|----|-------------|----|-----------|----|-----------|-----------------------|
| Baseline HADS-D          | 44 | Count (%)   | 45 | Count (%) | 53 | Count (%) |                       |
| Normal                   |    | 32 (72.7)   |    | 31 (68.9) |    | 38 (71.7) |                       |
| Mild                     |    | 8 (18.2)    |    | 11 (24.4) |    | 7 (13.2)  |                       |
| Moderate                 |    | 3 (6.8)     |    | 3 (6.7)   |    | 8 (15.1)  |                       |
| Severe                   |    | 1 (2.3)     |    | 0         |    | 0         |                       |
| 6 month follow-up HADS-D |    |             |    |           |    |           |                       |
| Normal                   |    | 32 (72.7)   |    | 32 (71.1) |    | 32 (60.4) |                       |
| Mild                     |    | 7 (15.9)    |    | 6 (13.3)  |    | 10 (18.9) |                       |
| Moderate                 |    | 5 (11.4)    |    | 6 (13.3)  |    | 8 (15.1)  |                       |
| Severe                   |    | 0           |    | 1 (2.2)   |    | 3 (5.7)   |                       |
| Difference HADS-D        |    |             |    |           |    |           |                       |
| ≤-1                      |    | 5 (11.4)    |    | 4 (8.9)   |    | 2 (3.8)   |                       |
| 0                        |    | 34 (77.3)   |    | 37 (82.0) |    | 40 (75.5) |                       |
| ≥1                       |    | 5 (11.4)    |    | 4 (8.9)   |    | 11 (20.8) | 0.32                  |
| P (within groups**)      |    | 1.0         |    | 0.71      |    | 0.03      |                       |
| Baseline HADS-A          | 44 | Count (%)   | 43 | Count (%) | 48 | Count (%) |                       |
| Normal                   |    | 25 (56.8)   |    | 30 (69.8) |    | 29 (60.4) |                       |
| Mild                     |    | 8 (18.2)    |    | 7 (16.3)  |    | 9 (18.8)  |                       |
| Moderate                 |    | 8 (18.2)    |    | 5 (11.6)  |    | 8 (16.7)  |                       |
| Severe                   |    | 3 (6.8)     |    | 1 (2.3)   |    | 2 (4.2)   |                       |
| 6 month follow-up HADS-A |    |             |    |           |    |           |                       |
| Normal                   |    | 27 (61.4)   |    | 29 (67.4) |    | 32 (66.7) |                       |
| Mild                     |    | 7 (15.9)    |    | 6 (14.0)  |    | 5 (10.4)  |                       |
| Moderate                 |    | 8 (18.2)    |    | 6 (14.0)  |    | 10 (20.8) |                       |
| Severe                   |    | 2 (4.5)     |    | 2 (4.7)   |    | 1 (2.1)   |                       |
| Difference HADS-A        |    |             |    |           |    |           |                       |
| ≤-1                      |    | 6 (13.6)    |    | 3 (7.0)   |    | 10 (20.8) |                       |
| 0                        |    | 35 (79.5)   |    | 33 (76.7) |    | 29 (60.4) |                       |
| ≥1                       |    | 3 (6.8)     |    | 7 (16.3)  |    | 9 (18.8)  | 0.14                  |
| P (within groups**)      |    | 0.25        |    | 0.21      |    | 0.55      |                       |

\* Number of participants in each group who completed the appropriate part of the HADS at both baseline and follow-up.

\*\* From marginal homogeneity test

\*\*\* From chi-squared test on difference in HADS



**Table 5:** Median HADS-Depression (HADS-D) and HADS-Anxiety (HADS-A) scores (interquartile range, IQR) at baseline and 6 month follow-up and difference between the two assessment point for each arm, prescribing, review and treatment as usual (TAU). Within and between arm p-values are also reported.

|                          | Prescribing |                  | Review |                 | TAU |                 | P (between groups) |
|--------------------------|-------------|------------------|--------|-----------------|-----|-----------------|--------------------|
|                          | n           | Median [IQR]     | n      | Median [IQR]    | n   | Median [IQR]    |                    |
| Baseline HADS-D          | 42          | 5.0 [3.0; 8.0]   | 44     | 4.5 [2.3; 8.0]  | 51  | 5.0 [3.0; 8.0]  | 0.02               |
| 6 month follow-up HADS-D |             | 4.0 [2.0; 8.0]   |        | 5.0 [2.0; 8.8]  |     | 5.0 [2.0; 10.0] |                    |
| Difference HADS-D        |             | -1.0 [-2.0; 0.0] |        | 0.0 [-1.0; 1.8] |     | 0.0 [-1.0; 2.0] |                    |
| P (within groups)        |             | 0.02             |        | 0.33            |     | 0.22            |                    |
| Baseline HADS-A          | 44          | 7.0 [3.3; 10.8]  | 43     | 5.0 [3.0; 10.0] | 48  | 6.0 [4.0; 10.0] | 0.05               |
| 6 month follow-up HADS-A |             | 5.0 [2.3; 9.8]   |        | 6.0 [3.0; 9.0]  |     | 7.0 [4.0; 10.0] |                    |
| Difference HADS-A        |             | -1.0 [-2.0; 0.0] |        | 0.0 [-2.0; 2.0] |     | 0.5 [-3.0; 2.0] |                    |
| P (within groups)        |             | 0.01             |        | 0.45            |     | 0.81            |                    |

\* Number of participants in each group who completed the appropriate part of the HADS at both baseline and follow-up.

Box 1 Examples of pharmacist interventions in the prescribing arm

**Changes to pain management:** 'use paracetamol regularly', 'take tramadol if needed' 'add piroxicam gel PRN', 'given web links to self help groups'

**Compliance aid:** ' gave written times that this drug could be taken'

**Addressing side effects/safety:** 'take paracetamol after initial NSAID', 'take senna', 'ordered blood monitoring', 'stop use of two NSAIDS'

**General health:** 'discussed weight loss', 'invited to practice nurse for BP', 'glucose, lipids and lifestyle update',

**Cost minimisation:** 'change aspirin EC to plain',

1  
2 BOX 2 Examples of quotes from Pharmacists (n=6), GPs (n=23) and patient participants (n=40)  
3 on the prescribing intervention  
4

5  
6 **Pharmacists (from interviews):**

7 **Satisfying** (n=6): 'contact with patients', 'being able to help patients', 'being able to make a  
8 difference to long-standing pain'...'even in small ways'  
9

10  
11 **Interesting** (n=6): 'learning about pain'

12  
13 **Challenging** (n=6): 'complex, chronically ill patients'

14  
15 **GPs (from interviews):**

16  
17 **Support for the service** (n=17): 'it's been a very positive thing'

18  
19 **Agreement with pharmacists' recommendations** (n=23): 'oh very reasonable suggestions',  
20 'tinkering round the edges', 'had been tried already'.  
21

22  
23 **Trust in the practice pharmacist** (n=23): 'I respect his professional judgement'

24  
25 **Cost effectiveness** (n=6): 'if there's limited resources do we want to spend the money on a  
26 pharmacist'.  
27

28  
29 **Patients (from 3 month questionnaire):**

30  
31 **Closed questions:**

32 Proportion agreeing that:

33 The pharmacist was interested in them (89%; 39/44)

34 They were totally satisfied (85%; 39/46)

35 They were told about their treatment (82%; 38/46)

36 Their consultation was thorough (79%; 34/44)

37 They would have liked more time (9%; 4/44)

38 They would have preferred to see their GP (9%; 4/44)

39 Too many people were now involved in their treatment (11%; 5/44).  
40

41  
42 **Open text questions:**

43  
44 Positive (n=39): 'She was professional, relaxed, pleasant and interested. Excellent!'  
45

46  
47 Negative (n=1): 'A waste of time, altered my tablets which made my pain worse'.  
48  
49  
50  
51  
52  
53  
54  
55  
56  
57  
58  
59  
60

## Title page

Pharmacist-led management of chronic pain in primary care: results from a randomised controlled exploratory trial

Hanne Bruhn, Christine M Bond, Alison M Elliott, Philip C Hannaford, Amanda J Lee, Paul McNamee, Blair H Smith, Margaret C Watson, Annie Blyth, Richard Holland, David Wright

Centre for Healthcare Randomised Trials, Health Services Research Unit, University of Aberdeen, 3<sup>rd</sup> floor Health Sciences Building, Foresterhill, Aberdeen, AB25 2ZD, UK Hanne Bruhn, Trial Manager

Centre of Academic Primary Care, Division of Applied Health Sciences, University of Aberdeen, Polwarth West Block, Foresterhill, Aberdeen, AB25 2ZD, UK, Christine M Bond, Professor of Primary Care: Pharmacy

Centre of Academic Primary Care, Division of Applied Health Sciences, University of Aberdeen, Polwarth West Block, Foresterhill, Aberdeen, AB25 2ZD, UK, Alison M Elliott, Senior Research Fellow

Centre of Academic Primary Care, Division of Applied Health Sciences, University of Aberdeen, Polwarth West Block, Foresterhill, Aberdeen, AB25 2ZD, UK, Philip C Hannaford, NHS Grampian Chair of Primary Care

Medical Statistics Team, Division of Applied Health Sciences~~Population Health, 1st floor,~~  
Polwarth Building, Foresterhill, Aberdeen, AB25 2ZD, UK, Amanda J Lee, Professor of Medical Statistics

Health Economics Research Unit, University of Aberdeen, Polwarth Building, Foresterhill, Aberdeen, AB25 2ZD, UK, Paul McNamee, Reader

Mackenzie Building, Kirsty Semple Way, Ninewells Hospital and Medical School, Dundee, DD2 4RB, UK, Blair H Smith, Professor of Population Science

Centre of Academic Primary Care, Division of Applied Health Sciences, University of Aberdeen, Polwarth West Block, Foresterhill, Aberdeen, AB25 2ZD, UK, Margaret C Watson, Senior Research Fellow

Norwich Medical School, Faculty of Medicine and Health Sciences, University of East Anglia, Norwich Research Park, Norwich, NR4 7TJ, UK, Annie Blyth, Research Associate

Norwich Medical School, Faculty of Medicine and Health Sciences, University of East Anglia, Norwich Research Park, Norwich, NR4 7TJ, UK, Richard Holland, Professor of Public Health Medicine

School of Pharmacy, University of East Anglia, Norwich Research Park, NR4 7TJ, UK, David Wright, Chair in Pharmacy Practice

1  
2  
3  
4  
5  
6 Correspondence to: Professor CM Bond c.m.bond@abdn.ac.uk, Centre of Academic Primary  
7 Care, Division of Applied Health Sciences, University of Aberdeen, Polwarth West Block,  
8 Foresterhill, Aberdeen, AB25 2ZD, UK  
9

10 The Corresponding Author has the right to grant on behalf of all authors and does grant on behalf of all  
11 authors, [a worldwide licence](#) to the Publishers and its licensees in perpetuity, in all forms, formats and  
12 media (whether known now or created in the future), to i) publish, reproduce, distribute, display and  
13 store the Contribution, ii) translate the Contribution into other languages, create adaptations, reprints,  
14 include within collections and create summaries, extracts and/or, abstracts of the Contribution, iii)  
15 create any other derivative work(s) based on the Contribution, iv) to exploit all subsidiary rights in the  
16 Contribution, v) the inclusion of electronic links from the Contribution to third party material where-  
17 ever it may be located; and, vi) licence any third party to do any or all of the above.  
18  
19  
20  
21  
22  
23  
24  
25  
26  
27  
28  
29  
30  
31  
32  
33  
34  
35  
36  
37  
38  
39  
40  
41  
42  
43  
44  
45  
46  
47  
48  
49  
50  
51  
52  
53  
54  
55  
56  
57  
58  
59  
60

## Abstract

### Objectives

To compare the effectiveness of pharmacist medication-review, with or without [pharmacist](#) prescribing, with standard care, for patients with chronic pain.

### Design

An exploratory randomised controlled trial.

### Setting

Six general practices with prescribing pharmacists in Grampian (3) and East Anglia (3).

### Participants

Patients on repeat prescribed pain medication (4815) were screened by GPs, and mailed invitations (1397). 196 were randomised and 180 (92%) completed. Exclusion criteria included: severe mental illness, terminally ill, cancer related pain, history of addiction

### Randomisation and intervention

Patients were randomised using a remote telephone service to: (i) pharmacist medication-review with face-to-face pharmacist prescribing; or (ii) pharmacist medication-review with feedback to GP and no planned patient contact; or (iii) treatment as usual (TAU). Blinding was not possible.

### Outcome measures

Primary outcomes were the Chronic Pain Grade (CPG) and the SF-12v2, together with Hospital Anxiety and Depression Scale (HADS). Outcomes were collected at 0, 3, and 6 months. Ethical approval was obtained.

### Results

In the prescribing arm (n=70) two patients were excluded/nine withdrew. In the review arm (n=63) one was excluded/three withdrew. In the TAU arm (n=63) four withdrew. Compared with baseline, patients had an improved CPG in the prescribing arm, 47.7% (21/44; p=0.003), and in the review arm, 38.6% (17/44; p=0.001), but not the TAU group, 31.3% (15/48; ns). The SF-12 PCS showed no effect in the prescribing or review arms but improvement in TAU

1  
2  
3  
4  
5  
6 (p=0.02). The SF-12 MCS showed no effect for the prescribing or review arms and deterioration  
7 in the TAU arm (p=0.002). HADS scores improved within the prescribing arm for Depression  
8 (p=0.022) and Anxiety (p=0.007), between groups (p=0.022 and p=0.045 respectively)  
9

10  
11 **-Conclusion**

12 This is the first RCT of pharmacist-prescribing in the UK, and suggests [a-~~there may be a~~-benefit](#)  
13 for patients with chronic pain. A larger trial is required.  
14

15  
16 Trial registration: [www.isrctn.org/ISRCTN06131530](http://www.isrctn.org/ISRCTN06131530). Medical Research Council funding.  
17  
18  
19

20 *Focus:*

- 21 • Chronic pain, (lasting >3 months) affects up to half the adult population, most  
22 of whom are primarily managed in primary care but prescribing is often sub-  
23 optimal.
- 24 • Pharmacists now have prescribing rights but no published research has  
25 compared the effectiveness of their prescribing with that of GPs.
- 26 • The ~~theory~~ hypothesis was that pharmacist advice (with or without pharmacist  
27 prescribing) would lead to better outcomes than usual care  
28

29 *Key messages:*

- 30 • The findings suggest [there may be](#) improved pain related outcomes for patients  
31 receiving pain related care from a pharmacist prescriber
- 32 • A larger trial is called for.  
33

34 *Strengths and Limitations*

- 35 • This the first randomised controlled trial of pharmacist prescribing in the UK  
36 looking at patient reported clinical outcomes
- 37 • The study was designed as an exploratory trial so no power calculation was  
38 done  
39  
40  
41  
42  
43  
44  
45  
46  
47  
48  
49  
50  
51  
52  
53  
54  
55  
56  
57  
58  
59  
60

## Introduction

Chronic pain (pain lasting more than three months) affects up to half the adult United Kingdom (UK) population, and is considered severely limiting in about 15% of cases (1). Recovery is uncommon with nearly 80% of those identified with chronic pain at baseline still reporting chronic pain four years later (2). It adversely affects many aspects of a person's physical and psychological health, and social and economic well being (3-6).

In the UK, most patients with chronic pain present, and are managed, in primary care (7).

Although non-pharmacological treatments are available, these are accessed by few patients, with mixed success (e.g. (8-10)). Analgesics prescribed in primary care remain the mainstay of treatment (4), representing substantial workload and cost. Sub-optimal prescribing may lead to poor pain control and other adverse patient outcomes. One study found that the most common medications involved in adverse drug reaction-related emergency admissions involved non-steroidal anti-inflammatory drugs (NSAIDs) (11) [which are commonly used to manage pain](#). Improved prescribing could result in better outcomes and remove the need for more costly, scarce, alternatives.

Pharmacists working in UK general practices are well-placed to improve pain pharmacotherapy because of their expertise in therapeutics, understanding of the poly-pharmacy regimens (12) frequently used in chronic pain management, and established relationships with other primary care colleagues. In the UK National Health Service (NHS), recent regulatory changes now allow accredited pharmacists (as well as some other health care professionals such as nurses) to prescribe prescription-only medicines (POMs) (13). [Pharmacists can either be qualified as supplementary prescribers, in which case they operate within an agree-d clinical management plan \(CMP\) in partnership with the doctor and patient, or as an independent prescriber, in which case they can either prescribe completely independently or within a CMP.-](#)

However, despite the increasing number of non-medical prescribers, including pharmacists, there has been no rigorous comparisons of the outcomes of non-medical versus GP prescribing. This information is needed to assess the clinical effectiveness of different care models.

This paper reports findings from an exploratory randomised controlled trial (RCT) comparing pharmacist medication review, with or without pharmacist prescribing, with standard care for



1  
2  
3  
4  
5 patients with chronic pain. Development of the trial was informed by earlier feasibility work  
6 (14,15).  
7  
8

9 The *a priori theory hypothesis* was that, in patients with chronic pain, pharmacist advice (with  
10 or without pharmacist prescribing) would lead to better patient functioning and/or better pain  
11 control at six months than treatment as usual (TAU). *The hypothesis was developed prior to*  
12 *data collection.*  
13  
14  
15  
16  
17  
18  
19

## 20 **Methods**

### 21 *Regulatory Issues*

22 Ethical approval was granted by the National Research Ethics Service Committee – North of  
23 Scotland (reference number 09/S0801/107). NHS Research and Development approval was  
24 granted by NHS Grampian and East Norfolk & Waveney Research Governance Committees.  
25 Patients gave informed consent before taking part.  
26  
27  
28

### 29 *Design*

30 An open, exploratory RCT in which patients were randomised to one of three study arms.  
31 Participants were not blind to allocated treatment arm due to the nature of the intervention.  
32  
33

### 34 *Recruitment of practices and independent prescribing pharmacists*

35 Practices in [the Grampian Health Board area](#), Scotland (n=18) and East Anglia [region of](#),  
36 England (n=4) known to have an attached Royal Pharmaceutical Society of Great Britain  
37 registered independent pharmacist prescriber, were eligible to take part. From those indicating  
38 a willingness to participate, convenience sampling was used to identify six general practices:  
39 three in Grampian and three in East Anglia.  
40  
41  
42  
43

### 44 *Patient inclusion and exclusion criteria*

45 Patients registered with the recruited practices were eligible for inclusion if they were over 18  
46 years of age, living in their own home, and receiving regular prescribed medication for pain.  
47  
48

49 Patients were identified by a computerised search [\(14\) \(5 McDermott, M. E. 2006\)](#) of the drug  
50 records of all individuals registered with the practice, to identify those who had received either  
51 two or more acute prescriptions, and/or one repeat prescription within the last 120 days, for  
52 an analgesic (British National Formulary (BNF section 4.7) and/or non-steroidal anti-  
53  
54  
55  
56  
57  
58  
59  
60

**Comment [g1]:** Think we need to stay away from word hypothesis since it implies a powered study

**Formatted:** Font: Italic

1  
2  
3  
4  
5  
6 inflammatory medication (NSAID) (BNF section 10.1.1). Medications which can be used for  
7 analgesia but whose primary indication is not chronic pain (e.g. triptans, anti-epileptics or anti-  
8 depressants) were excluded as these drugs identify few additional eligible patients (16). In  
9 accordance with trial criteria, GPs excluded and recorded reasons for patients who had: a  
10 concomitant severe mental health problem or terminal illness; had suffered recent  
11 bereavement; had a known alcohol or drug addiction; suffered pain caused by cancer or other  
12 malignancy; were unable to give informed consent; other (unspecified) reasons.  
13  
14  
15

#### 16 *Patient recruitment*

17  
18 Eligible patients were sent an invitation pack (letter, information sheet, consent form) by  
19 practice staff between March and June 2010. Consent forms were returned directly to the  
20 researchers, who sent out a baseline questionnaire. Patients returning completed  
21 questionnaires were randomised by the researcher using a telephone randomisation service  
22 with a random number allocation which ensured allocation concealment. The allocation  
23 sequence was 1:1:1.  
24  
25  
26  
27

#### 28 *Intervention*

29  
30 All participating pharmacists took part in a two-day course updating them about pain  
31 management. As part of the training, participants defined and agreed the treatment algorithm  
32 they would all use.  
33  
34

35 'Prescribing' arm: Pharmacists invited patients to a face-to-face consultation. Prior to the  
36 consultation, pharmacists completed a paper-based medication review of each patient's  
37 medical record and patients were asked to complete a pain diary to inform the consultation. A  
38 pharmaceutical care plan was agreed between the pharmacist and the patient. The plan  
39 assessed and documented relevant past medical history and current conditions; known  
40 allergies and adverse drug reactions; relevant laboratory results; pain-related medications  
41 prescribed in the previous 10 years; current pain related prescription medications; current  
42 symptoms; lifestyle issues, including units of alcohol consumed per week; recommendations  
43 for changes to medication (if any); whether non-pharmaceutical treatments had been  
44 considered; and, any other relevant issues. [Copies of the pain diary and pharmaceutical care  
45 plan are available -from the authors on request.](#) At the end of the consultation any required  
46 prescriptions for medicines were issued by the pharmacist. Due to Controlled Drug (CD)  
47 regulations in place at the time, prescribing for CDs was done using a supplementary  
48  
49  
50  
51  
52  
53  
54  
55  
56  
57  
58  
59  
60

1  
2  
3  
4  
5  
6 prescribing Clinical Management Plan (17), rather than independent prescribing. Patients were  
7 followed up either by phone or face-to-face, at each pharmacist's discretion.  
8

9  
10 'Review arm': The pharmacists conducted a paper-based medication review focussed on pain-  
11 related prescription medications, before creating a pharmaceutical care plan which detailed  
12 any recommendations for medication changes. The plan was passed to the patient's GP for  
13 implementation. The GPs were asked subsequently about actions taken as a result of the  
14 recommendations. The GPs were asked subsequently about actions taken as a result of the  
15 recommendations.  
16

17  
18 Treatment as usual (TAU): Patients received standard general practice care.  
19

#### 20 *Outcome measures*

21 There were two primary outcome measures: the Chronic Pain Grade (CPG) and the Medical  
22 Outcomes Study 12-item short form version 2 (SF-12v2). Use of both a pain specific and generic  
23 outcome measure was based on Initiative on Methods, Measurement, and Pain Assessment in  
24 Clinical Trials (IMMPACT) recommendations (18) and an earlier (18,19) feasibility study (15).  
25  
26

27  
28  
29 The CPG (1920) is a seven item scale which assesses pain severity on two dimensions: disability  
30 and intensity. The scale classifies pain according to level of intensity and disability (I (low  
31 disability-low intensity) to IV (high disability-severely limiting)).  
32  
33

34  
35 The SF-12v2 is a generic health and functioning scale (2021), previously used in population-  
36 based studies of pain (21, 2222,23). A Physical (PCS) and Mental Component Score (MCS) was  
37 calculated, ranging from 0 to 100; a higher score indicates better functioning.  
38  
39

40  
41 A secondary outcome measure was the (4) Hospital Anxiety and Depression Scale (HADS  
42 (2324), a 14-item screening instrument which identifies the possible and probable caseness of  
43 anxiety (7 items (HADS-A)) and depression (7 items (HADS-D)); each item scored from 0 (not  
44 present) to 3 (highly present). Standard thresholds and previously used labels (245) were  
45 applied (no depression/anxiety (0-7), mild (8-10), moderate (11-15) or severe (>15)).  
46  
47  
48  
49

#### 50 *Data collection*

#### 51 *Participant questionnaires*

52  
53  
54  
55  
56  
57  
58  
59  
60

1  
2  
3  
4  
5  
6 Questionnaires were posted to participants at baseline (pre-randomisation), and 3 and 6  
7 months post-randomisation (follow-up was conducted between July 2010 and January 2011).

8 Up to two reminders were sent. Questionnaire content included the outcome measures  
9 described above together with items on: demographic status (baseline only); screening items  
10 to confirm eligibility (baseline only); duration of pain condition (baseline only); location of pain;  
11 Morisky Medication Adherence Scale 4 (MMAS-4) (256); participant satisfaction (11 statements  
12 derived from the feasibility study for the prescribing arm (3 months only) and additional  
13 comments by participants. The MMAS-4 provides a score of self-reported adherence to  
14 medication regimen. Scores range from 0 (low adherence) to 4 (high adherence).  
15  
16  
17  
18  
19

#### 20 *Follow-up interviews with staff*

21 Post-intervention, all pharmacists and all GPs in participating practices were invited to take part  
22 in semi-structured interviews, carried out face-to-face when possible, otherwise by telephone.  
23 Interviews were taped, transcribed verbatim and content analysis was carried out.  
24  
25  
26

#### 27 *Sample size*

28 As this was an exploratory trial to estimate the effect size for a larger trial, no formal sample  
29 size calculation was possible (267). We aimed to recruit 30 participants per practice (excluding  
30 those recruited for training purposes) i.e. 180 in total. This was deemed sufficient to give  
31 reliable effect size estimates for the primary outcome measures of chronic pain grade or health  
32 status.  
33  
34  
35  
36

#### 37 *Data management and analysis*

38 Data were entered into identical SPSS databases at each site and accuracy checks carried out  
39 on 10% before databases were merged. Descriptive statistics included means and standard  
40 deviations (SD) for normally distributed continuous data, medians (interquartile range (IQR))  
41 for skewed continuous data and percentages (n) for categorical data. Analysis was conducted  
42 on an intention-to-treat basis for participants with complete data on relevant measures using  
43 SPSS version 18.  
44  
45  
46  
47  
48

49 Exploratory analyses for parametric data included the paired t-test for within-arm comparisons  
50 [of mean difference between baseline and 6 months](#) and one-way ANOVA for between arm  
51 comparisons [of mean difference](#). For non-parametric data it included the Wilcoxon Signed  
52 Rank test for within-arm comparisons [of median difference](#) and the Kruskal Wallis test for  
53  
54  
55  
56  
57  
58  
59  
60

1  
2  
3  
4  
5  
6 between arm comparisons of median difference. Categorical data was analysed using the  
7 marginal homogeneity test for within-arm comparisons of (with null hypothesis that the  
8 distribution of CPG grade or HADS group does not change between baseline and 6 month  
9 follow-up) and the Chi-squared test for between arm comparisons; analyses reported here are  
10 based on 6 month follow-up data (other than for participant experiences). Within arm effect  
11 sizes, expressed in terms of a Pearson correlation coefficient (r) have been calculated using the  
12 formulas from Rosenthal (1991) (27). Effect sizes can be directly compared using Cohen's  
13 (1988) (28) criteria of r=0.1 (small effect); r=0.3 (medium effect) and r=0.5 (large effect).

Formatted: Not Highlight

Formatted: Not Highlight

## 19 Results

### 20 *Response rates and demography*

21 Six of the seven practices approached participated. GPs excluded 12% (392/3281) of patients,  
22 mostly those with dementia. There was no statistically significant difference between  
23 participants and non-participants in terms of age, gender, and index of multiple deprivation.  
24 Figure 1 shows the flow of participants through the study. Overall, the consent rate was 25%  
25 (356/1397) and the recruitment rate was 14% (196/1397).  
26  
27  
28  
29

30 [INSERT FIGURE 1 HERE]

31  
32 Eighty six percent of participants (251/289) returned baseline questionnaires, of whom 232  
33 were randomised (36 participants were randomised to one of the two intervention arms for  
34 training purposes and were not included in any further analysis and 19 were not included as  
35 recruitment target had been met). The overall follow-up rate at 3 months was 86%  
36 (161/187) and at 6 months 84% (152/180).  
37  
38  
39

40 As shown in Table 1, groups were similar at baseline for demographic and socioeconomic  
41 variables and pain data. Most participants were married, Caucasian and female, older (mean  
42 (SD) age 65 (12.6) years), had an annual income of <£25,000 and had suffered from pain for at  
43 least five years. Most (57%;103/181) reported being fully adherent to their medication  
44 regimen (MMAS-4, median 4.0 (IQR 3.0- 4.0)) (15 missing MMAS scores).  
45  
46  
47  
48

49 [INSERT TABLE 1 HERE]

50  
51 In the prescribing arm, 78% (53/68) attended an initial prescribing consultation, 31 had at least  
52 one planned follow-up (of which 34/37 were generally conducted by phone) and 130  
53  
54  
55

1  
2  
3  
4  
5  
6 recommendations were made for 92% (49/53) of participants seen. Examples are shown in Box  
7 1. The median time taken for the note-based record review was 35 minutes (IQR 20.0, 45.0),  
8 the consultation was 30 minutes (IQR 20.0, 40.0), careplan preparation 10 minutes (IQR 10.0,  
9 20.0) and median duration of follow-ups was 10 minutes (IQR 5.0- 15.0).

10  
11  
12 [INSERT BOX 1 HERE]

13  
14 In the review arm 97% (60/62) of participants' records were reviewed (note there was one post  
15 randomisation exclusion) for whom 197 recommendations were made. Where GP feedback  
16 was provided (n=48), they generally agreed with pharmacists' recommendations, which were  
17 fully implemented for 20 participants (two by the pharmacist following request by GP), partially  
18 for 19 participants and not at all for nine participants. The median time taken for the note-  
19 based record review was 30 minutes (IQR 24.3, 45.0), and careplan preparation was 10  
20 minutes (IQR 5.0, 20.0).

#### 21 22 23 24 25 26 27 *Clinical outcome measures*

28 Table 2 shows the mean (SD) or median (IQR) of the CPG for each arm at baseline and 6 month  
29 follow-up. Table 3 shows the SF-12 scores and Table 4 shows the HADS-A and HADS-D results.

30  
31  
32 [INSERT TABLE 2,3,4, HERE]

33  
34 In the prescribing arm, there was a statistically significant within arm improvement for the CPG  
35 intensity ( $p=0.002$ , [effect size \(r\)=0.45](#)) and disability ( $p=0.003$ , [effect size \(r\)=0.43](#)) subscales,  
36 and between arms on the intensity sub-scale ( $p=0.02$ ), but not the disability subscale ( $p=0.55$ )  
37 (Table 2). There was a significant within-arm improvement in overall CPG grade in the  
38 prescribing ( $p=0.003$ ) and review arm ( $p=0.001$ ), but not in the TAU arm. The SF-12 Physical  
39 Component Score showed a statistically significant within arm improvement in the TAU arm  
40 ( $p=0.02$ , [effect size \(r\)=0.35](#)) (Table 3), but not between trial arms. The SF-12 Mental  
41 Component Score showed a statistically significant deterioration in the TAU arm ( $p=0.002$ ,  
42 [effect size \(r\)=0.45](#)) (Table 3), as did the HADS-D ( $p=0.03$ , Table 4). Analysis was also carried out  
43 on the non-categorised HADS scores which showed a statistically significant improvement  
44 within the prescribing arm for Depression ( $p=0.022$ ) and Anxiety ( $p=0.007$ ). These were both  
45 significant between groups ( $p=0.022$  and  $p=0.045$  respectively) (Table 5).

#### 46 47 48 49 50 51 52 53 54 *Acceptability of the pharmacist prescribing intervention*

1  
2  
3  
4  
5 All six pharmacists and 56% of the GPs (23/41) were interviewed. All pharmacists and most GPs  
6 were positive about the intervention, although some GPs suggested that the pharmacists'  
7 recommendations had been minor and questioned the cost-effectiveness of the service.  
8  
9 Patient participants were generally positive about the pharmacist prescribing service although  
10 some concerns were identified, as illustrated by the quotes shown in Box 2.  
11  
12

13  
14 [INSERT BOX 2 HERE]  
15

## 16 Discussion

### 17 *Principal findings*

18 This exploratory RCT of pharmacist-led management of patients with chronic pain suggests that  
19 pharmacist prescribing (and possibly pharmacist review alone) may be effective in improving  
20 pain-related outcomes and be acceptable to both patients and [most](#) professionals. There was  
21 an indication of a positive effect on emotional health, but no measurable effect on general  
22 health.  
23  
24  
25  
26  
27

### 28 *Strengths and weaknesses*

29 This was the first RCT to assess clinical and humanistic outcomes after pharmacist prescribing  
30 for any clinical condition compared to usual GP care, and the first RCT to specifically assess  
31 pharmacist-led management of chronic pain, compared with usual GP care. It was based on  
32 extensive development and feasibility work (14,15) in line with MRC framework for  
33 development and evaluation of complex interventions ([2829](#)). A range of validated outcome  
34 measures was included, as well as a parallel qualitative process evaluation which [demonstrated](#)  
35 [assessed](#) satisfaction and acceptability. The inclusion of six practices and their associated  
36 pharmacists from both Scotland and England increased the generalisability of the findings.  
37  
38  
39  
40  
41

42 Pharmacists [received formal training and](#) agreed and used a common treatment algorithm  
43 which should have increased standardisation of treatment. [The preponderance of females](#)  
44 [\(overall 62%\) and average age of 65 years reflects the wider chronic pain population \(1\) as](#)  
45 [does the distribution of pain site \(30, 31,29,30\)](#)  
46  
47  
48

49 There were, however limitations. Although high follow-up response rates were achieved at  
50 both three (86%) and six months (85%) only 25% of eligible patients entered the trial. This low  
51 initial consent rate is in line with other studies ([32, 3331,3229,30](#)), but may cause unknown  
52 biases including problems of generalisability, [as does the solely Caucasian- ethnicity. Concerns](#)  
53  
54  
55  
56  
57  
58  
59  
60

1  
2  
3  
4  
5  
6 [identified by participants during the formal feedback e.g. having too many people involved in](#)  
7 [one's care may have contributed to poor response rates and r](#)ewording of participant  
8 recruitment documentation [to reassure participants of the role of the pharmacist](#) could  
9 address [this. some of the concerns identified by participant feedback e.g. having too many](#)  
10 [people involved in one's care.](#) More participants withdrew in the prescribing arm compared  
11 with the other two arms, which might be attributed to the need for an additional practice visit.  
12  
13 The study was an exploratory trial so no formal power calculation was undertaken. ~~However,~~  
14 ~~because there were no published MIDs available to estimate effect size for the outcomes in this~~  
15 ~~population, it was important to present the actual clinical magnitude of change in outcome at 6 months~~  
16 ~~alongside a statistical assessment of this change (p-value). This allows an assessment of both clinical~~  
17 ~~and statistical significance simultaneously with the caveat that this is an exploratory study. With around~~  
18 ~~50 patients per arm, this was deemed sufficient numbers to examine the change in outcome measures~~  
19 ~~with appropriate within and between group univariate statistical tests. because of no prior~~  
20 ~~knowledge of effect size.~~ Due to the nature of the intervention, no participants were blind to  
21 their group allocation, and so some outcomes, especially the qualitative components, may have  
22 been affected by social desirability bias.  
23  
24  
25  
26  
27  
28  
29  
30

31 Our main outcome measures were self-reported, but this is the norm in pain studies as pain is a  
32 subjective experience (18). Furthermore we do not know how important the observed  
33 differences were to participants. Following precedents set in previous research (25), and  
34 because there is no consensus on an alternative measure (3431) we used the HADS as a tool to  
35 classify people by severity of depression and anxiety. However it is strictly a screening tool, and  
36 the four levels of severity have not been formally validated. We therefore also compared  
37 outcomes using it as a continuous scale.  
38  
39  
40  
41

#### 42 *Relationship with other studies*

43 This study is important because no other RCT has evaluated pharmacist prescribing and few  
44 studies, and importantly no RCTs, have evaluated pharmacist interventions for pain. In  
45 pharmacist prescribing most research has focussed on reported experiences of professionals  
46 and patients, and not used validated outcome measures. Yet pharmacist prescribing is now  
47 widely practised. For pain, there have been a few small studies. Briggs et al (2008) (3542)  
48 conducted a small before-and-after evaluation (involving 65 patients) of a nurse and  
49 pharmacist-led chronic pain clinic in primary care. Pain intensity Visual Analogue Scale scores  
50  
51  
52  
53  
54



1  
2  
3  
4  
5 reduced significantly over six months. Another evaluation of 26 patients using a medication  
6 review service provided jointly by a physiotherapist and pharmacist [in the UK](#), reported  
7 improvement in pain control for 88% of patients ([3653](#)).  
8  
9

10 The CPG was found to show a graded effect across the three arms, showing discrimination with  
11 both direction and strength of improvement, suggesting maximum benefit for those in the  
12 pharmacist prescribing arm. However, the reduction in overall score appears to be mediated by  
13 a change in the intensity of pain subscale rather than in pain-related disability. [The effect size  
14 of 0.45 suggests this could be an important difference.](#) In contrast, the SF-12, a measure of  
15 general health and functionality showed no significant difference between intervention arms,  
16 reflecting either no effect or or lack of power to detect an effect.  
17  
18  
19  
20  
21

22 Whilst most participants in this study were already within the normal range on the HADS scale,  
23 and therefore had minimal chance of improvement, there were nonetheless suggestions of  
24 better outcomes in participants in the prescribing arm. Including a range of instruments is in  
25 line with IMMPACT recommendations ([3764](#)), which state that focus should be on the whole  
26 person, not just about pain. However, this needs to be balanced with minimising participant  
27 burden.  
28  
29  
30  
31

### 32 *Explanations, implications, and future research*

33 The number of pharmacists' recommendations per participant was higher in the review arm  
34 than in the prescribing arm. This might seem contradictory to the possible greater benefit  
35 found in the prescribing arm. However, in the prescribing arm pharmacists met the participant  
36 and may have more readily identified and dismissed suggestions previously -tried. The  
37 interview feedback highlighted that some recommendations for change, whilst sensible, had  
38 been tried already. This might also be the reason why there were only 60% of pharmacist  
39 recommendations with which the GP fully agreed. Self-reported adherence to medication at  
40 baseline was good. Despite this, the pharmacists still improved pain outcomes in the  
41 prescribing arm. This could have been due to changes in medications and/or participant  
42 education about optimal timing for administration of analgesic medicines. Further research is  
43 needed to confirm the beneficial effect of pharmacist prescribing and its sustainability.  
44  
45  
46  
47  
48  
49  
50

### 51 **Conclusion**

1  
2  
3  
4  
5  
6 Our results suggest that pharmacist prescribing -(and possibly pharmacist review alone) -for  
7 patients with chronic pain is feasible, acceptable and may lead to improvements...acceptable  
8 and leads to improvements\_ in pain and other measures. A larger fully-powered trial is now  
9 needed to confirm these findings.  
10

Formatted: Font: (Default) +Body (Calibri),  
12 pt, Not Bold, Not Italic

### 11 **Data sharing statement**

12 Consent was not obtained from participants for data sharing; the presented data are  
13 anonymised and there is no risk of individual -identification. Requests for data- should be made to  
14 the contact author who will provide this in a format in which risk of patient identification will be  
15 minimal.  
16

### 17 **Conflict of interest statement**

18 All authors have completed the Unified Competing Interest form at [www.icmje.org/coi\\_disclosure.pdf](http://www.icmje.org/coi_disclosure.pdf)  
19 (available on request from the corresponding author) and declare: no support from any organisation for  
20 the submitted work; no financial relationships with any organisations that might have an interest in the  
21 submitted work in the previous 3 years; no other relationships or activities that could appear to have  
22 influenced the submitted work.  
23

### 24 **Authors' contributions**

25 HB and CB drafted the manuscript.

26 All authors:

- 27 1) made substantial contributions to conception and design, or acquisition of data, or analysis and  
28 interpretation of data;
- 29 2) were involved in drafting the manuscript or revising it critically for important intellectual content; and
- 30 3) have given final approval of the version to be published.  
31

### 32 **Acknowledgements**

33 We thank the participating patients, practices and pharmacists. We would also like to thank  
34 Kirsten Harrild (Medical Statistics, UOA) for statistical support. Rick Adams (School of  
35 Pharmacy, UEA) helped design and deliver the pharmacist training and Lesley Thomson (NHS  
36 Grampian) helped design the pharmacist data collection forms. The patient postal  
37 questionnaire was based on work by Nicola Cooper and the Norfolk Arthritis Register (NOAR)  
38 research team. The Pharmacy-Led Management of Chronic Pain Study Team acknowledges the  
39  
40  
41  
42  
43

1  
2  
3  
4  
5 financial support of NHS Research Scotland (NRS), through Scottish Primary Care Research  
6 Network Northeast. The work was conducted as part of the Aberdeen Pain Research  
7 Collaboration. The project was funded by the Medical Research Council. They had no further  
8 involvement in any aspect of study conduct; all researchers were independent of the funding  
9 body.  
10  
11  
12

13 All authors had access to all of the study data and can take responsibility for the integrity of the  
14 data and the accuracy of the data analysis.  
15  
16

### 17 References

18  
19 (1) Elliott AM, Smith BH, Penny KI, Smith WC, Chambers WA. The epidemiology of chronic pain  
20 in the community. *Lancet* 1999;354:1248-1252.  
21

22 (2) Elliott AM, Smith BH, Hannaford P, Smith WC, Chambers WA. The course of chronic pain in  
23 the community: results of a 4-year follow-up study. *Pain* 2002;99:299-307.  
24

25 (3) Becker N, Bondegaard Thomsen A, Olsen AK, Sjøgren P, Bech P, Eriksen J. Pain epidemiology  
26 and health related quality of life in chronic non-malignant pain center patients referred to  
27 a Danish multidisciplinary. *Pain* 1997;73:393-400.  
28

29 (4) Breivik H, Collett B, Ventafridda V, Cohen R, Gallacher D. Survey of chronic pain in Europe:  
30 prevalence, impact on daily life, and treatment. *Eur J Pain* 2006;10:287-333.  
31

32 (5) Gureje O, Von Korff M, Simon GE, Gater R. Persistent pain and well-being: a World Health  
33 Organization Study in Primary Care. *JAMA* 1998;280:147-151.  
34

35 (6) Magni G, Marchetti M, Moreschi C, Merskey H, Luchini SR. Chronic musculoskeletal pain and  
36 depressive symptoms in the National Health and Nutrition Examination. I. Epidemiologic  
37 follow-up study. *Pain* 1993;53:163-168.  
38

39 (7) Sullivan MD, Turner JA, Romano J. Chronic pain in primary care: identification and  
40 management of psychological factors. *J Fam Pract* 1991;32:193-199.  
41

42 (8) Green S, Buchbinder R, Hetrick SE. Physiotherapy interventions for shoulder pain. *Cochrane*  
43 *Database of Syst Rev* 2010(9):Art. No.: CD004258. DOI: 10.1002/14651858.CD004258.  
44

45 (9) Eccleston C, Williams, A. C. D. C., Morley S. Psychological therapies for the management of  
46 chronic pain (excluding headache)  
47 in adults. *Cochrane Database Syst Rev* 2009 Apr 15;(2):CD007407. DOI:  
48 10.1002/14651858.CD007407.pub2.  
49

50 (10) Haetzman M, Elliott AM, Smith BH, Hannaford P, Chambers WA. Chronic pain and the use  
51 of conventional and alternative therapy. *Family Practice* 2003;20(2):147-154.  
52  
53  
54  
55  
56  
57  
58  
59  
60

- 1  
2  
3  
4  
5  
6 (11) Pirmohamed M, James S, Meakin S, Green C, Scott AK, Walley TJ, et al. Adverse drug  
7 reactions as cause of admission to hospital: prospective analysis of 18 820 patients. *BMJ*  
8 2004;329:15.
- 9  
10 (12) Krska J, Cromarty JA, Arris F, Jamieson D, Hansford D, Duffus PR, et al. Pharmacist-led  
11 medication review in patients over 65: a randomized, controlled trial in primary care. *Age and*  
12 *Ageing* 2001;30:205-211.
- 13  
14 (13) Department of Health. Improving patients' access to medicines: A guide to implementing  
15 nurse and pharmacist independent prescribing within the NHS England. Department of Health  
16 2006.
- 17  
18 (14) McDermott ME, Smith BH, Elliott AM, Bond CM, Hannaford P, Chambers WA. The use of  
19 medication for chronic pain in primary care, and the potential for intervention by practice-  
20 based pharmacist. *Family Practice* 2006;23:46-52.
- 21  
22 (15) Bruhn H, Bond CM, Elliott AM, Hannaford PC, Lee AJ, McNamee P, et al. Developing an RCT  
23 of general practice-based, pharmacist-led, management of chronic pain: the PIPPC study. *IJPP*  
24 2010;18(Supplement 2).
- 25  
26 (16) Smith BH, Read JRM, Chambers WAC, Watt B, Grimshaw JM. Researching chronic pain:  
27 identification of a community based sample. *The Pain Clinic* 1996;9:73-76.
- 28  
29 (17) Department of Health. Supplementary prescribing by nurses and pharmacists within the  
30 NHS in England: A guide for implementation. Department of Health 2003.
- 31  
32 (18) Turk DC, Dworkin RH, Allen RR, Bellamy N, Brandenburg N, Carr DB, et al. Core outcome  
33 domains for chronic pain clinical trials: IMMEDIATE recommendations. *Pain* 2003 12;106(3):337-  
34 345.
- 35  
36 ~~(19) The Community Pharmacy Medicines Management Project Evaluation Team. The~~  
37 ~~MEDMAN study: a randomized controlled trial of community pharmacy led medicines~~  
38 ~~management for patients with coronary heart disease. *Family Practice* 2007;24:189-200.~~
- 39  
40 (1920) Von Korff M, Ormel J, Keefe FJ, Dworkin SF. Grading the severity of chronic pain. *Pain*  
41 1992;50:133-149.
- 42  
43 (2024) Ware JE, Kosinski M, Turner-Bowker DM, Sundaram M, Gandek B, Maruish ME. User's  
44 Manual for the SF-12v2 Health Survey. Second edition ed.: QualityMetric, Incorporated, 2009;  
45 2009.
- 46  
47 (2122) Nicholl BI, Macfarlane GJ, Davies KA, Morriss R, Dickens C, McBeth J. Premorbid  
48 psychosocial factors are associated with poor health-related quality of life in subjects with new  
49 onset of chronic widespread pain - results from the EPIFUND study. *Pain* 2009;141:119-126.
- 50  
51 (2223) Carmona L, Ballina J, Gabriel R, Laffon A. The burden of musculoskeletal diseases in the  
52 general population of Spain: results from a national survey. *Ann Rheum Dis* 2001;60:1040-1045.
- 53  
54  
55  
56  
57  
58  
59  
60

(2324) Zigmond AS, Snaith RP. The hospital anxiety and depression scale. Acta Psychiatr Scand 1983 Jun;67(6):361-370.

(2425) Snaith RP, Zigmond AS. HADS: Hospital Anxiety and Depression Scale. Windsor: NFER Nelson; 1994.

(2526) Morisky DE, Green LW, Levine DM. Concurrent and predictive validity of a self-reported measure of medication adherence. Med Care 1986 Jan;24(1):67-74.

(2627) Lancaster GA, Dood S, Williamson PR. Design and analysis of pilot studies: recommendations for good practice. J Eval Clin Pract 2004;10(2):307-312.

(27) Rosenthal R. Meta-analytic procedures for social research (revised). Newbury Park, CA. Sage 1991.

(28) Cohen J. Statistical power analysis for the behavioural sciences (2<sup>nd</sup> edition). New York. Academic Press.

(2928) Craig P, Dieppe P, Macintyre S, Michie S, Nazareth I, Petticrew M. Developing and evaluating complex interventions: the new Medical Research Council guidance. BMJ 2008;337:a1655.

(3029) Magni M, Caldieron C, Rigatti-Luchini S, Merskey H. Chronic musculo-skeletal pain and depressive symptoms in the general population. An analysis of the 1st National Health and Nutrition Examination Survey data. Pain 1990; 43: 299-307

(3130) Gureje O, Von Korff M, Simon GE, Gater R. Persistent pain and well-being. A World Health Organization study in primary care. Journal of the American Medical Association 1998; 280: 147-151.

(322931) Community Pharmacy Medicines Management Project Evaluation Team. The MEDMAN study: a randomized controlled trial of community pharmacy-led medicines management for patients with coronary heart disease. Family Practice 2007;24:189-200.

(333032) Treweek S, Mitchell E, Pitkethly M, Cook J, Kjeldstrøm M, Johansen M, et al. Strategies to improve recruitment to randomised controlled trials. Cochrane Database Syst Rev 2010;(4):MR000013 2011.

(343133) Cameron IM, Cardy A, Crawford JR, du Toit Schalk W, Hay S, Lawton K, et al. Measuring depression severity in general practice: discriminatory performance of the PHQ-9, HADS-D, and BDI-II. Br J Gen Pract 2011;61:e419-e426(8).

(353234) Briggs M, Closs SJ, Marczewski K, Barratt J. A feasibility study of a combined nurse/pharmacist-led chronic pain clinic in primary care. Qual Prim Care 2008;16:91-94.

(363335) Anonymous. Pharmacist and physiotherapist-led community outreach pain programme improve quality of life. The Pharmaceutical Journal 2005;275:14.

Formatted: Space After: 0 pt

Formatted: Normal

Formatted: Space Before: 0 pt, After: 0 pt

Formatted: Font: Calibri, 12 pt, Not Bold, Font color: Auto

Formatted: Font: Calibri, 12 pt, Not Bold, Font color: Auto

Formatted: Font: Calibri, Not Bold, Font color: Auto

Formatted: Font: Calibri, Not Bold, Font color: Auto

1  
2  
3  
4  
5  
6 | (373436) Turk DC, Dworkin RH, Revicki D, Harding G, Burke LB, Cella D, et al. Identifying  
7 important outcome domains for chronic pain clinical trials: An IMMPACT survey of people with  
8 pain. 2008;137:276-285.

9  
10 ~~Rosenthal R. Meta-analytic procedures for social research (revised). Newbury Park, CA. Sage~~  
11 ~~1991.~~

12 ~~Cohen J. Statistical power analysis for the behavioural sciences (2<sup>nd</sup> edition). New York.~~  
13 ~~Academic Press.~~  
14  
15  
16  
17  
18  
19  
20  
21  
22  
23  
24  
25  
26  
27  
28  
29  
30  
31  
32  
33  
34  
35  
36  
37  
38  
39  
40  
41  
42  
43  
44  
45  
46  
47  
48  
49  
50  
51  
52  
53  
54  
55  
56  
57  
58  
59  
60

Formatted: Font: +Body (Calibri), Superscript

Figure 1: CONSORT Flow Diagram

1  
2  
3  
4  
5  
6  
7  
8  
9  
10  
11  
12  
13  
14  
15  
16  
17  
18  
19  
20  
21  
22  
23  
24  
25  
26  
27  
28  
29  
30  
31  
32  
33  
34  
35  
36  
37  
38  
39  
40  
41  
42  
43  
44  
45  
46  
47  
48  
49  
50  
51  
52  
53  
54  
55  
56  
57  
58  
59  
60

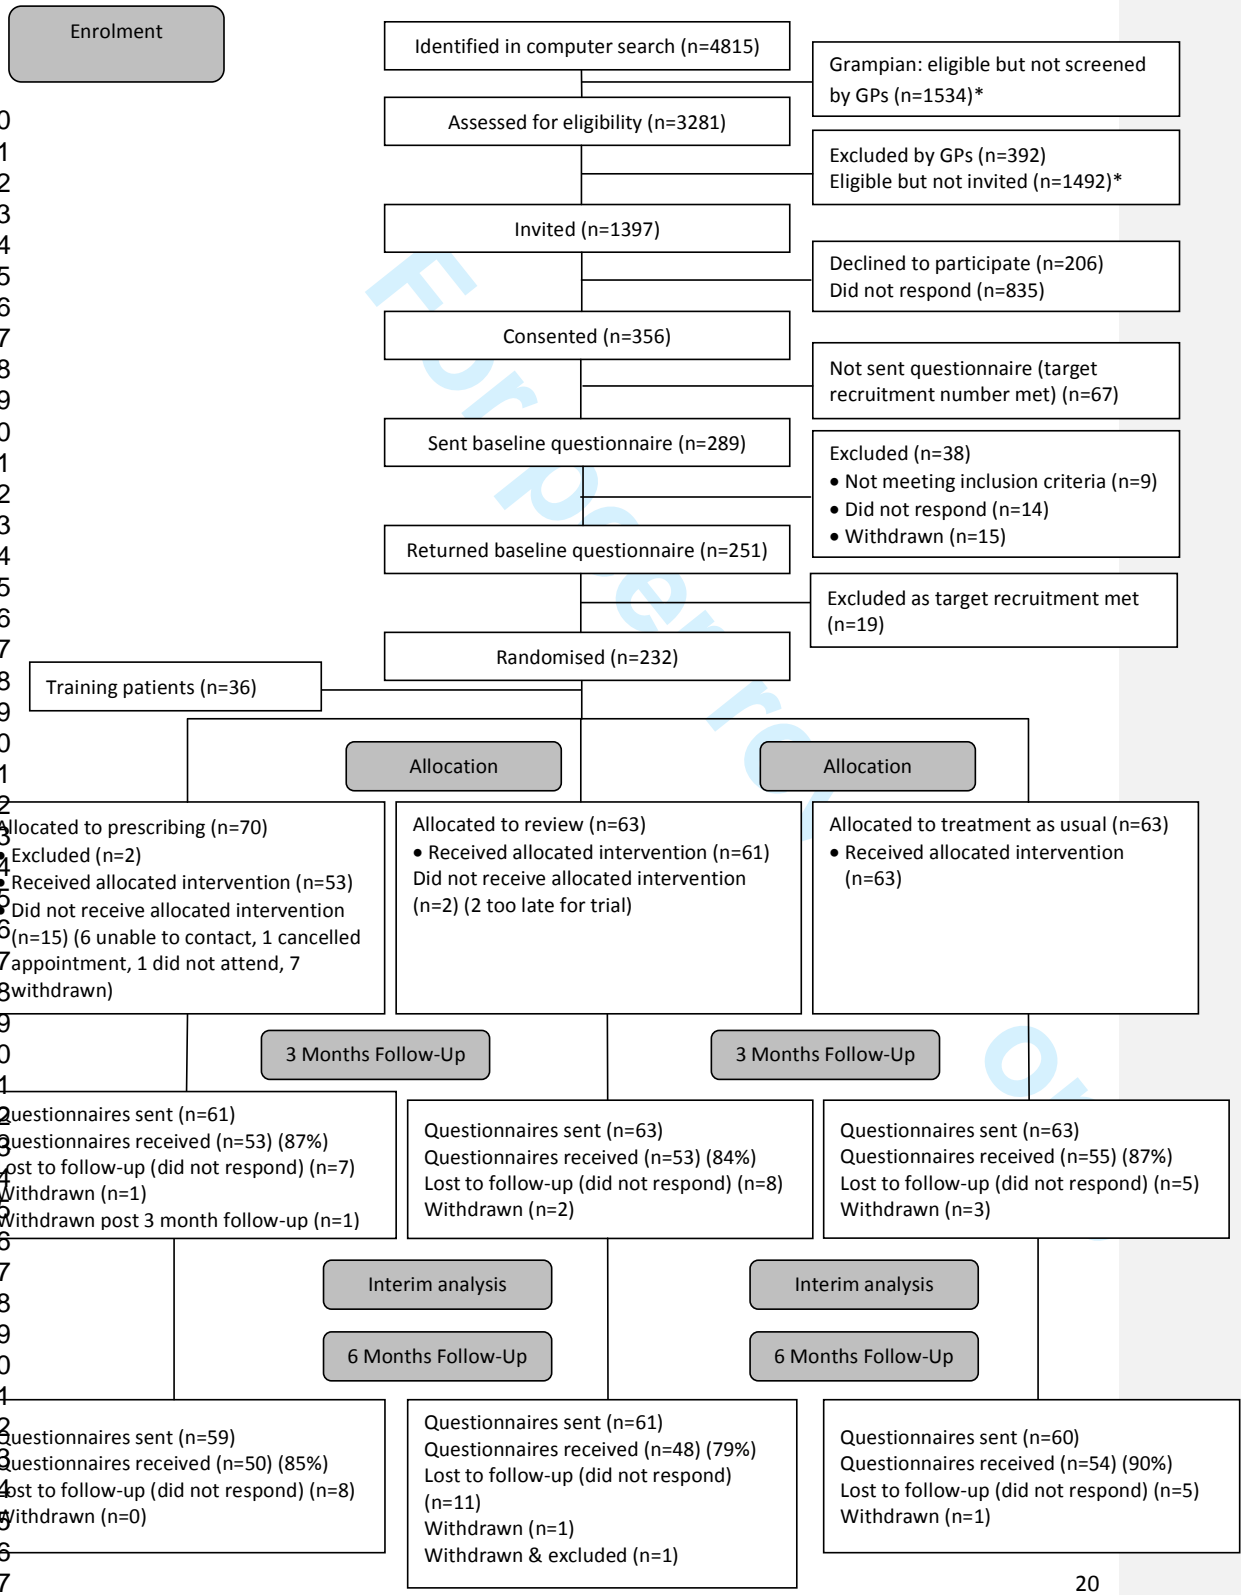

1  
2  
3  
4  
5  
6 | \*In [the Grampian Health Board area](#) Grampian, on the basis of response rates in the earlier feasibility  
7 study (241 screened patients resulted in 22 recruited) only a random sample of eligible participants  
8 were screened (15). In East Anglia all eligible patients were screened.  
9  
10  
11  
12  
13  
14  
15  
16  
17  
18  
19  
20  
21  
22  
23  
24  
25  
26  
27  
28  
29  
30  
31  
32  
33  
34  
35  
36  
37  
38  
39  
40  
41  
42  
43  
44  
45  
46  
47  
48  
49  
50  
51  
52  
53  
54  
55  
56  
57  
58  
59  
60

For peer review only



**Table 1:** Baseline demographic, socio-economic and pain data of patients by study arm, prescribing, review and treatment as usual (TAU)

|                                           | Prescribing*<br>(n = 68) | Review*<br>(n = 62) | TAU*<br>(n = 63) |
|-------------------------------------------|--------------------------|---------------------|------------------|
| Age: mean (SD)                            | 66.1 (12.1)              | 65.7 (14.2)         | 64.9 (11.6)      |
| Missing                                   | 1                        | 1                   | 0                |
| Gender (% female)                         | 54.4 (37)                | 74.2 (46)           | 58.7 (37)        |
| <i>Marital status</i>                     |                          |                     |                  |
| Married                                   | 43                       | 30                  | 41               |
| Single                                    | 6                        | 6                   | 3                |
| Divorced/widow                            | 10                       | 21                  | 13               |
| Other                                     | 6                        | 4                   | 6                |
| Missing                                   | 3                        | 1                   | 0                |
| <i>Highest educational level achieved</i> |                          |                     |                  |
| No qualifications                         | 30                       | 27                  | 21               |
| O grade or equivalent                     | 12                       | 6                   | 14               |
| Higher/A-level/NVQ3/SVQ3                  | 6                        | 8                   | 7                |
| Tertiary education/NVQ4/NVQ5              | 18                       | 17                  | 14               |
| Other                                     | 2                        | 1                   | 4                |
| Missing                                   | 0                        | 3                   | 3                |
| <i>Employment status</i>                  |                          |                     |                  |
| Employed                                  | 16                       | 14                  | 9                |
| Unemployed                                | 3                        | 5                   | 1                |
| Retired                                   | 38                       | 35                  | 34               |
| Long term sick/disabled                   | 7                        | 5                   | 9                |
| Other                                     | 3                        | 2                   | 7                |
| Missing                                   | 1                        | 1                   | 3                |
| <i>Household annual income before tax</i> |                          |                     |                  |
| Less than £9,999                          | 13                       | 15                  | 10               |
| £10,000 - £14,999                         | 14                       | 18                  | 22               |
| £15,000 - £24,999                         | 14                       | 12                  | 12               |
| £25,000 – or more                         | 22                       | 11                  | 8                |
| Missing                                   | 5                        | 6                   | 11               |
| <i>Ethnic group</i>                       |                          |                     |                  |
| Caucasian                                 | 67                       | 62                  | 61               |
| Other                                     | 1                        |                     |                  |
| Missing                                   | 0                        | 0                   | 2                |
| <i>Pain duration</i>                      |                          |                     |                  |
| < 1 year                                  | 3                        | 2                   | 4                |
| 1 – 3 years                               | 12                       | 12                  | 7                |
| 3 – 5 years                               | 10                       | 13                  | 9                |
| 5 – 10 years                              | 17                       | 13                  | 15               |
| > 10 years                                | 26                       | 22                  | 28               |
| <i>Pain localisation (% , n)</i>          |                          |                     |                  |
| Back                                      | 27.9 (19)                | 32.3 (20)           | 20.6 (13)        |
| Neck, shoulders                           | 7.4 (5)                  | 9.7 (6)             | 9.5 (6)          |
| Limbs or hips                             | 42.6 (29)                | 30.6 (19)           | 50.8 (32)        |
| Other                                     | 8.8 (6)                  | 4.8 (3)             | 7.9 (5)          |
| Missing                                   | 9                        | 14                  | 7                |

\*Denominator based on numbers allocated to the specific arms, minus any exclusions due to protocol violations.

**Table 2:** Mean (standard deviation, SD) CPG intensity , median (interquartile range, IQR) CPG disability, and count CPG grade at baseline, 6 months follow-up and difference between the two assessment points for each arm, prescribing, review and treatment as usual (TAU). P-values for within and between arm differences are also reported.

|                                   | Prescribing |                   | Review |                    | TAU |                   | P (between groups <sup>***</sup> ) |
|-----------------------------------|-------------|-------------------|--------|--------------------|-----|-------------------|------------------------------------|
|                                   | n*          | Mean (SD)         | n*     | Mean (SD)          | n*  | Mean (SD)         |                                    |
| Baseline CPG intensity            | 47          | 66.1 (16.0)       | 45     | 68.4 (17.6)        | 54  | 65.4 (18.0)       |                                    |
| 6 month follow-up CPG intensity   |             | 58.1 (19.5)       |        | 67.4 (21.7)        |     | 65.6 (19.6)       |                                    |
| Difference CPG intensity          |             | -8.0 (16.3)       |        | -1.0 (16.0)        |     | 0.2 (14.9)        | <b>0.02</b>                        |
| P (within groups <sup>**</sup> )  |             | 0.002             |        | 0.67               |     | 0.93              | <b>0.02</b>                        |
| Effect size (r)                   |             | <b>0.45x</b>      |        | <b>0.07x</b>       |     | <b>0.01x</b>      |                                    |
|                                   |             | Median [IQR]      |        | Median [IQR]       |     | Median [IQR]      |                                    |
| Baseline CPG disability           | 48          | 60.0 [30.0; 75.8] | 46     | 66.7 [45.0; 80.0]  | 53  | 56.7 [36.7; 80.0] |                                    |
| 6 Month follow-up CPG disability  |             | 40.0 [20.0; 60.0] |        | 53.3 [29.2; 73.3]  |     | 50.0 [25.0; 80.0] |                                    |
| Difference CPG disability         |             | -8.3 [-23.3; 0.0] |        | -3.3 [-16.7; 10.0] |     | -3.3 [-21.7; 5.0] | <b>0.55</b>                        |
| P (within groups <sup>**</sup> )  |             | 0.003             |        | 0.15               |     | 0.05              | <b>0.55</b>                        |
| Effect size (r)                   |             | <b>0.43x</b>      |        | <b>0.20x</b>       |     | <b>0.26x</b>      |                                    |
| Baseline CPG grade                | 44          | Count (%)         | 44     | Count (%)          | 48  | Count (%)         |                                    |
|                                   | I           | 5 (11.4)          |        | 3 (6.8)            |     | 5 (10.4)          |                                    |
|                                   | II          | 16 (36.4)         |        | 9 (20.5)           |     | 13 (27.1)         |                                    |
|                                   | III         | 7 (15.9)          |        | 10 (22.7)          |     | 13 (27.1)         |                                    |
|                                   | VI          | 16 (36.4)         |        | 22 (50.0)          |     | 17 (35.4)         |                                    |
| 6 month follow-up CPG grade       |             |                   |        |                    |     |                   |                                    |
|                                   | I           | 13 (29.5)         |        | 8 (18.2)           |     | 6 (12.5)          |                                    |
|                                   | II          | 13 (29.5)         |        | 15 (34.1)          |     | 17 (35.4)         |                                    |
|                                   | III         | 8 (18.2)          |        | 8 (18.2)           |     | 11 (22.9)         |                                    |
|                                   | IV          | 10 (22.7)         |        | 13 (29.5)          |     | 14 (29.2)         |                                    |
| Difference CPG grade              |             |                   |        |                    |     |                   |                                    |
|                                   | ≤-1         | 21 (47.7)         |        | 17 (38.6)          |     | 15 (31.2)         |                                    |
|                                   | 0           | 17 (38.6)         |        | 25 (56.8)          |     | 25 (52.1)         |                                    |
|                                   | ≥1          | 6 (13.6)          |        | 2 (4.5)            |     | 8 (2.1)           | 0.16                               |
| P (within groups <sup>***</sup> ) |             | 0.003             |        | 0.001              |     | 0.17              |                                    |

\*Number of participants in each group who completed the appropriate part of the CPG at both baseline and follow-up.

\*\* From paired t-test, Wilcoxon signed rank test or marginal homogeneity test as appropriate

\*\*\* From ANOVA on mean difference, Kruskal-Wallis on median difference or chi-squared test on difference in CPG grade as appropriate

**Table 3:** Mean (standard deviation, SD) SF12 Physical Component Score (PCS) and median (interquartile range, IQR) Mental Component Score (MCS) at baseline and 6 month follow-up and difference between the two assessment points for each arm, prescribing, review and treatment as usual (TAU). Within and between arm p-values are also reported.

|                                  | Prescribing |                   | Review |                   | TAU |                   | P (between groups <sup>***</sup> ) |
|----------------------------------|-------------|-------------------|--------|-------------------|-----|-------------------|------------------------------------|
|                                  | n*          | Mean (SD)         | n*     | Mean (SD)         | n*  | Mean (SD)         |                                    |
| Baseline SF12 PCS                | 41          | 33.5 (10.8)       | 43     | 32.59(11.38)      | 45  | 29.60 (9.71)      |                                    |
| 6 month follow-up SF12 PCS       |             | 35.3 (10.8)       |        | 34.62 (11.26)     |     | 32.59 (9.14)      |                                    |
| Difference SF12 PCS              |             | 1.8 (7.5)         |        | 2.02 (7.56)       |     | 2.99 (8.11)       | <b>0.75</b>                        |
| P (within groups <sup>**</sup> ) |             | 0.12              |        | 0.09              |     | 0.02              | <b>0.75</b>                        |
| Effect size (r)                  |             | <u>0.24x</u>      |        | <u>0.26x</u>      |     | <u>0.35x</u>      |                                    |
|                                  |             | Median [IQR]      |        | Median (IQR)      | 45  | Median (IQR)      |                                    |
| Baseline SF12 MCS                | 42          | 52.4 [42.0; 58.8] | 43     | 47.9 [38.5; 59.9] |     | 51.5 [41.3; 60.7] |                                    |
| 6 month follow-up SF12 MCS       |             | 49.6 [42.8; 58.1] |        | 47.9 [38.9; 56.2] |     | 44.7 [37.6; 55.8] |                                    |
| Difference SF12 MCS              |             | -0.4 [-3.7; 6.0]  |        | -1.2 [-6.6; 4.2]  |     | -3.0 [-10.0; 1.3] | <b>0.04</b>                        |
| P (within groups <sup>**</sup> ) |             | 0.64              |        | 0.37              |     | 0.002             | <b>0.04</b>                        |
| Effect size (r)                  |             | <u>0.07x</u>      |        | <u>0.14x</u>      |     | <u>0.46x</u>      |                                    |

\* Number of participants in each group who completed the appropriate part of the SF-12 at both baseline and follow-up.

\*\* From paired t-test or Wilcoxon signed rank test as appropriate

\*\*\* From ANOVA on mean difference or Kruskal-Wallis test on median difference as appropriate

**Table 4:** The HADS-Depression (HADS-D) and HADS-Anxiety (HADS-A) count of patients according to severity (normal, mild, moderate or severe) and the difference in severity category between the two assessment points for each arm, prescribing, review and treatment as usual (TAU). Within and between arm p-values are also reported.\*

|                                  | n  | Prescribing | n  | Review    | n  | TAU       | P (between groups <sup>***</sup> ) |
|----------------------------------|----|-------------|----|-----------|----|-----------|------------------------------------|
| Baseline HADS-D                  | 44 | Count (%)   | 45 | Count (%) | 53 | Count (%) |                                    |
| Normal                           |    | 32 (72.7)   |    | 31 (68.9) |    | 38 (71.7) |                                    |
| Mild                             |    | 8 (18.2)    |    | 11 (24.4) |    | 7 (13.2)  |                                    |
| Moderate                         |    | 3 (6.8)     |    | 3 (6.7)   |    | 8 (15.1)  |                                    |
| Severe                           |    | 1 (2.3)     |    | 0         |    | 0         |                                    |
| 6 month follow-up HADS-D         |    |             |    |           |    |           |                                    |
| Normal                           |    | 32 (72.7)   |    | 32 (71.1) |    | 32 (60.4) |                                    |
| Mild                             |    | 7 (15.9)    |    | 6 (13.3)  |    | 10 (18.9) |                                    |
| Moderate                         |    | 5 (11.4)    |    | 6 (13.3)  |    | 8 (15.1)  |                                    |
| Severe                           |    | 0           |    | 1 (2.2)   |    | 3 (5.7)   |                                    |
| Difference HADS-D                |    |             |    |           |    |           |                                    |
| ≤-1                              |    | 5 (11.4)    |    | 4 (8.9)   |    | 2 (3.8)   |                                    |
| 0                                |    | 34 (77.3)   |    | 37 (82.0) |    | 40 (75.5) |                                    |
| ≥1                               |    | 5 (11.4)    |    | 4 (8.9)   |    | 11 (20.8) | 0.32 <sup>Net valid**</sup>        |
| P (within groups <sup>**</sup> ) |    | 1.0         |    | 0.71      |    | 0.03      |                                    |
| Baseline HADS-A                  | 44 | Count (%)   | 43 | Count (%) | 48 | Count (%) |                                    |
| Normal                           |    | 25 (56.8)   |    | 30 (69.8) |    | 29 (60.4) |                                    |
| Mild                             |    | 8 (18.2)    |    | 7 (16.3)  |    | 9 (18.8)  |                                    |
| Moderate                         |    | 8 (18.2)    |    | 5 (11.6)  |    | 8 (16.7)  |                                    |
| Severe                           |    | 3 (6.8)     |    | 1 (2.3)   |    | 2 (4.2)   |                                    |
| 6 month follow-up HADS-A         |    |             |    |           |    |           |                                    |
| Normal                           |    | 27 (61.4)   |    | 29 (67.4) |    | 32 (66.7) |                                    |
| Mild                             |    | 7 (15.9)    |    | 6 (14.0)  |    | 5 (10.4)  |                                    |
| Moderate                         |    | 8 (18.2)    |    | 6 (14.0)  |    | 10 (20.8) |                                    |
| Severe                           |    | 2 (4.5)     |    | 2 (4.7)   |    | 1 (2.1)   |                                    |
| Difference HADS-A                |    |             |    |           |    |           |                                    |
| ≤-1                              |    | 6 (13.6)    |    | 3 (7.0)   |    | 10 (20.8) |                                    |
| 0                                |    | 35 (79.5)   |    | 33 (76.7) |    | 29 (60.4) |                                    |
| ≥1                               |    | 3 (6.8)     |    | 7 (16.3)  |    | 9 (18.8)  | 0.14                               |
| P (within groups <sup>**</sup> ) |    | 0.25        |    | 0.21      |    | 0.55      |                                    |

\* Number of participants in each group who completed the appropriate part of the HADS at both baseline and follow-up.

**\*\* Between arms p-value not valid due to low numbers in multiple cells, even after collapsing to the**

**\*\* From marginal homogeneity test**

**\*\*\* From chi-squared test on difference in HADS**

1  
2  
3  
4  
5  
6  
7  
8  
9  
10  
11  
12  
13  
14  
15  
16  
17  
18  
19  
20  
21  
22  
23  
24  
25  
26  
27  
28  
29  
30  
31  
32  
33  
34  
35  
36  
37  
38  
39  
40  
41  
42  
43  
44  
45  
46  
47  
48  
49  
50  
51  
52  
53  
54  
55  
56  
57  
58  
59  
60

ree categories.

For peer review only

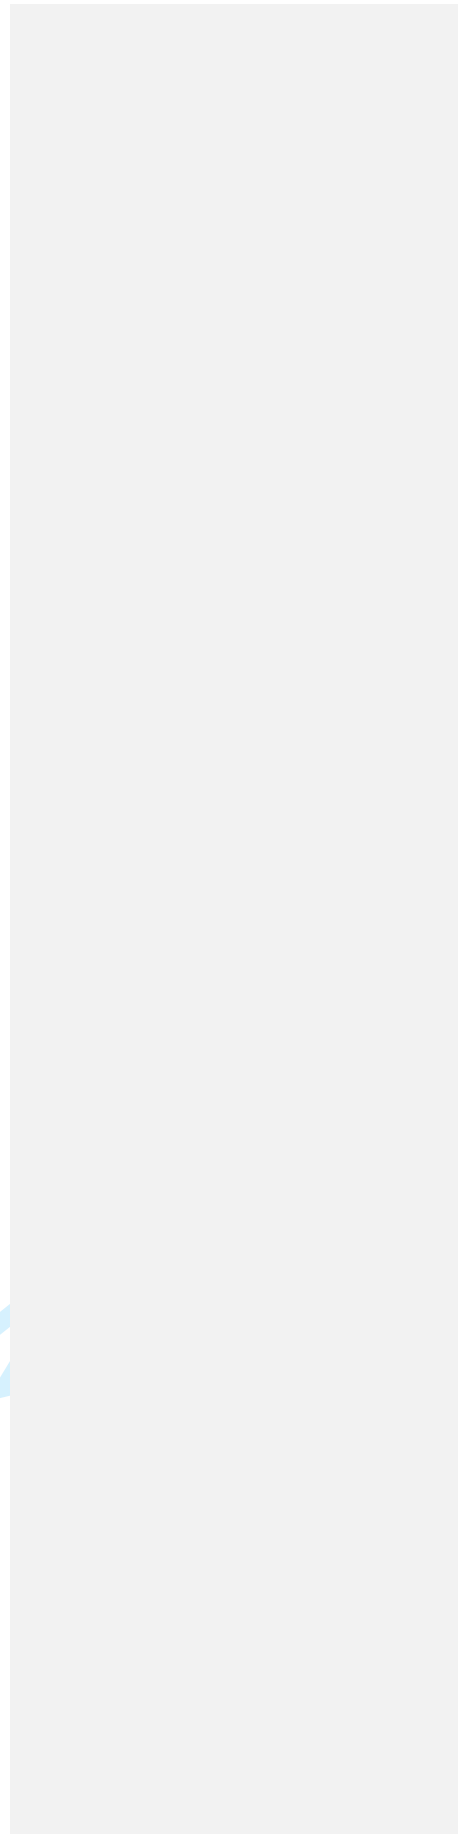

**Table 5:** Median HADS-Depression (HADS-D) and HADS-Anxiety (HADS-A) scores (interquartile range, IQR) at baseline and 6 month follow-up and difference between the two assessment point for each arm, prescribing, review and treatment as usual (TAU). Within and between arm p-values are also reported.

|                          | Prescribing |                  | Review |                 | TAU |                 | P (between groups) |
|--------------------------|-------------|------------------|--------|-----------------|-----|-----------------|--------------------|
|                          | n           | Median [IQR]     | n      | Median [IQR]    | n   | Median [IQR]    |                    |
| Baseline HADS-D          | 42          | 5.0 [3.0;8.0]    | 44     | 4.5 [2.3; 8.0]  | 51  | 5.0 [3.0; 8.0]  | 0.02               |
| 6 month follow-up HADS-D |             | 4.0 [2.0; 8.0]   |        | 5.0 [2.0; 8.8]  |     | 5.0 [2.0; 10.0] |                    |
| Difference HADS-D        |             | -1.0 [-2.0; 0.0] |        | 0.0 [-1.0; 1.8] |     | 0.0 [-1.0; 2.0] |                    |
| P (within groups)        |             | 0.02             |        | 0.33            |     | 0.22            |                    |
| Baseline HADS-A          | 44          | 7.0 [3.3; 10.8]  | 43     | 5.0 [3.0; 10.0] | 48  | 6.0[4.0; 10.0]  | 0.05               |
| 6 month follow-up HADS-A |             | 5.0 [2.3; 9.8]   |        | 6.0 [3.0; 9.0]  |     | 7.0 [4.0; 10.0] |                    |
| Difference HADS-A        |             | -1.0 [-2.0; 0.0] |        | 0.0 [-2.0; 2.0] |     | 0.5 [-3.0; 2.0] |                    |
| P (within groups)        |             | 0.01             |        | 0.45            |     | 0.81            |                    |

\* Number of participants in each group who completed the appropriate part of the HADS at both baseline and follow-up.

Box 1 Examples of pharmacist interventions in the prescribing arm

**Changes to pain management:** 'use paracetamol regularly', 'take tramadol if needed' 'add piroxicam gel PRN', 'given web links to self help groups'

**Compliance aid:** 'gave written times that this drug could be taken'

**Addressing side effects/safety:** 'take paracetamol after initial NSAID', 'take senna', 'ordered blood monitoring', 'stop use of two NSAIDS'

**General health:** 'discussed weight loss', 'invited to practice nurse for BP', 'glucose, lipids and lifestyle update',

**Cost minimisation:** 'change aspirin EC to plain',

BOX 2 Examples of quotes from Pharmacists (n=6), GPs (n=23) and patient participants (n=40) on the prescribing intervention

**Pharmacists (from interviews):**

**Satisfying** (n=6): 'contact with patients', 'being able to help patients', 'being able to make a difference to long-standing pain'... 'even in small ways'

**Interesting** (n=6): 'learning about pain'

**Challenging** (n=6): 'complex, chronically ill patients'

**GPs (from interviews):**

**Support for the service** (n=17): 'it's been a very positive thing'

**Agreement with pharmacists' recommendations** (n=23): 'oh very reasonable suggestions', 'tinkering round the edges', 'had been tried already'.

**Trust in the practice pharmacist** (n=23): 'I respect his professional judgement'

**Cost effectiveness** (n=6): 'if there's limited resources do we want to spend the money on a pharmacist'.

**Patients (from 3 month questionnaire):**

**Closed questions:**

Proportion agreeing that:

The pharmacist was interested in them (89%; 39/44)

They were totally satisfied (85%; 39/46)

They were told about their treatment (82%; 38/46)

Their consultation was thorough (79%; 34/44)

They would have liked more time (9%; 4/44)

They would have preferred to see their GP (9%; 4/44)

Too many people were now involved in their treatment (11%; 5/44).

**Open text questions:**

Positive (n=39): 'She was professional, relaxed, pleasant and interested. Excellent!'

Negative (n=1): 'A waste of time, altered my tablets which made my pain worse'.





## CONSORT 2010 checklist of information to include when reporting a randomised trial\*

| Section/Topic                    | Item No | Checklist item                                                                                                                                                                              | Reported on page No |
|----------------------------------|---------|---------------------------------------------------------------------------------------------------------------------------------------------------------------------------------------------|---------------------|
| <b>Title and abstract</b>        |         |                                                                                                                                                                                             |                     |
|                                  | 1a      | Identification as a randomised trial in the title                                                                                                                                           | 1                   |
|                                  | 1b      | Structured summary of trial design, methods, results, and conclusions (for specific guidance see CONSORT for abstracts)                                                                     | 3-4                 |
| <b>Introduction</b>              |         |                                                                                                                                                                                             |                     |
| Background and objectives        | 2a      | Scientific background and explanation of rationale                                                                                                                                          | 5                   |
|                                  | 2b      | Specific objectives or hypotheses                                                                                                                                                           | 5-6                 |
| <b>Methods</b>                   |         |                                                                                                                                                                                             |                     |
| Trial design                     | 3a      | Description of trial design (such as parallel, factorial) including allocation ratio                                                                                                        | 6                   |
|                                  | 3b      | Important changes to methods after trial commencement (such as eligibility criteria), with reasons                                                                                          | N/A                 |
| Participants                     | 4a      | Eligibility criteria for participants                                                                                                                                                       | 6                   |
|                                  | 4b      | Settings and locations where the data were collected                                                                                                                                        | 6                   |
| Interventions                    | 5       | The interventions for each group with sufficient details to allow replication, including how and when they were actually administered                                                       | 7-8                 |
| Outcomes                         | 6a      | Completely defined pre-specified primary and secondary outcome measures, including how and when they were assessed                                                                          | 8                   |
|                                  | 6b      | Any changes to trial outcomes after the trial commenced, with reasons                                                                                                                       | N/A                 |
| Sample size                      | 7a      | How sample size was determined                                                                                                                                                              | 9                   |
|                                  | 7b      | When applicable, explanation of any interim analyses and stopping guidelines                                                                                                                | N/A                 |
| <b>Randomisation:</b>            |         |                                                                                                                                                                                             |                     |
| Sequence generation              | 8a      | Method used to generate the random allocation sequence                                                                                                                                      | 7                   |
|                                  | 8b      | Type of randomisation; details of any restriction (such as blocking and block size)                                                                                                         | N/A                 |
| Allocation concealment mechanism | 9       | Mechanism used to implement the random allocation sequence (such as sequentially numbered containers), describing any steps taken to conceal the sequence until interventions were assigned | 7                   |
| Implementation                   | 10      | Who generated the random allocation sequence, who enrolled participants, and who assigned participants to interventions                                                                     | 7                   |
| Blinding                         | 11a     | If done, who was blinded after assignment to interventions (for example, participants, care providers, those                                                                                | N/A                 |

|                                                      |     |                                                                                                                                                   |                                                        |
|------------------------------------------------------|-----|---------------------------------------------------------------------------------------------------------------------------------------------------|--------------------------------------------------------|
|                                                      |     | assessing outcomes) and how                                                                                                                       |                                                        |
|                                                      | 11b | If relevant, description of the similarity of interventions                                                                                       | N/A                                                    |
| Statistical methods                                  | 12a | Statistical methods used to compare groups for primary and secondary outcomes                                                                     | 9                                                      |
|                                                      | 12b | Methods for additional analyses, such as subgroup analyses and adjusted analyses                                                                  | N/A                                                    |
| <b>Results</b>                                       |     |                                                                                                                                                   |                                                        |
| Participant flow (a diagram is strongly recommended) | 13a | For each group, the numbers of participants who were randomly assigned, received intended treatment, and were analysed for the primary outcome    | 10, figure 1(p.18)                                     |
|                                                      | 13b | For each group, losses and exclusions after randomisation, together with reasons                                                                  | 10, figure 1(p.18)                                     |
| Recruitment                                          | 14a | Dates defining the periods of recruitment and follow-up                                                                                           | 7-8                                                    |
|                                                      | 14b | Why the trial ended or was stopped                                                                                                                | N/A                                                    |
| Baseline data                                        | 15  | A table showing baseline demographic and clinical characteristics for each group                                                                  | 10, Table 1 (p20)                                      |
| Numbers analysed                                     | 16  | For each group, number of participants (denominator) included in each analysis and whether the analysis was by original assigned groups           | See Tables 2,3,4,5 and page 9 (ITT)                    |
| Outcomes and estimation                              | 17a | For each primary and secondary outcome, results for each group, and the estimated effect size and its precision (such as 95% confidence interval) | See pages 10/11, and Tables 2,3,4,5. P values reported |
|                                                      | 17b | For binary outcomes, presentation of both absolute and relative effect sizes is recommended                                                       | N/A                                                    |
| Ancillary analyses                                   | 18  | Results of any other analyses performed, including subgroup analyses and adjusted analyses, distinguishing pre-specified from exploratory         | N/A                                                    |
| Harms                                                | 19  | All important harms or unintended effects in each group (for specific guidance see CONSORT for harms)                                             | N/A                                                    |
| <b>Discussion</b>                                    |     |                                                                                                                                                   |                                                        |
| Limitations                                          | 20  | Trial limitations, addressing sources of potential bias, imprecision, and, if relevant, multiplicity of analyses                                  | 12                                                     |
| Generalisability                                     | 21  | Generalisability (external validity, applicability) of the trial findings                                                                         | 12-13                                                  |
| Interpretation                                       | 22  | Interpretation consistent with results, balancing benefits and harms, and considering other relevant evidence                                     | 13                                                     |
| <b>Other information</b>                             |     |                                                                                                                                                   |                                                        |
| Registration                                         | 23  | Registration number and name of trial registry                                                                                                    | 4                                                      |

1  
2  
3  
4  
5  
6  
7  
8  
9  
10  
11  
12  
13  
14  
15  
16  
17  
18  
19  
20  
21  
22  
23  
24  
25  
26  
27  
28  
29  
30  
31  
32  
33  
34  
35  
36  
37  
38  
39  
40  
41  
42  
43  
44  
45  
46  
47  
48  
49

|          |    |                                                                                 |     |
|----------|----|---------------------------------------------------------------------------------|-----|
| Protocol | 24 | Where the full trial protocol can be accessed, if available                     | N/A |
| Funding  | 25 | Sources of funding and other support (such as supply of drugs), role of funders | 14  |

\*We strongly recommend reading this statement in conjunction with the CONSORT 2010 Explanation and Elaboration for important clarifications on all the items. If relevant, we also recommend reading CONSORT extensions for cluster randomised trials, non-inferiority and equivalence trials, non-pharmacological treatments, herbal interventions, and pragmatic trials. Additional extensions are forthcoming: for those and for up to date references relevant to this checklist, see [www.consort-statement.org](http://www.consort-statement.org).

For peer review only



**Pharmacist-led management of chronic pain in primary care: results from a randomised controlled exploratory trial**

|                                 |                                                                                                                                                                                                                                                                                                                                                                                                                                                                                                                                                                                                                                                               |
|---------------------------------|---------------------------------------------------------------------------------------------------------------------------------------------------------------------------------------------------------------------------------------------------------------------------------------------------------------------------------------------------------------------------------------------------------------------------------------------------------------------------------------------------------------------------------------------------------------------------------------------------------------------------------------------------------------|
| Journal:                        | <i>BMJ Open</i>                                                                                                                                                                                                                                                                                                                                                                                                                                                                                                                                                                                                                                               |
| Manuscript ID:                  | bmjopen-2012-002361.R2                                                                                                                                                                                                                                                                                                                                                                                                                                                                                                                                                                                                                                        |
| Article Type:                   | Research                                                                                                                                                                                                                                                                                                                                                                                                                                                                                                                                                                                                                                                      |
| Date Submitted by the Author:   | 06-Feb-2013                                                                                                                                                                                                                                                                                                                                                                                                                                                                                                                                                                                                                                                   |
| Complete List of Authors:       | Bruhn, Hanne; University of Aberdeen, Health Services Research Unit<br>Bond, Christine; University of Aberdeen,<br>Elliott, Alison; University of Aberdeen, General Practice and Primary Care<br>Hannaford, Phil; University of Aberdeen<br>Lee, Amanda; University of Aberdeen, Division of Applied Health Sciences<br>McNamee, Paul; University of Aberdeen<br>Smith, Blair; University of Dundee,<br>Watson, Margaret; University of Aberdeen, General Practice and Primary Care<br>Blyth, Annie; University of East Anglia, Norwich Medical School<br>Wright, David; University of East Anglia, Infection<br>Holland, Richard; University of East Anglia, |
| <b>Primary Subject Heading</b>: | General practice / Family practice                                                                                                                                                                                                                                                                                                                                                                                                                                                                                                                                                                                                                            |
| Secondary Subject Heading:      | General practice / Family practice, Health services research                                                                                                                                                                                                                                                                                                                                                                                                                                                                                                                                                                                                  |
| Keywords:                       | PAIN MANAGEMENT, PRIMARY CARE, Clinical trials < THERAPEUTICS                                                                                                                                                                                                                                                                                                                                                                                                                                                                                                                                                                                                 |
|                                 |                                                                                                                                                                                                                                                                                                                                                                                                                                                                                                                                                                                                                                                               |

SCHOLARONE™  
Manuscripts

only

## Title page

Pharmacist-led management of chronic pain in primary care: results from a randomised controlled exploratory trial

Hanne Bruhn, Christine M Bond, Alison M Elliott, Philip C Hannaford, Amanda J Lee, Paul McNamee, Blair H Smith, Margaret C Watson, Annie Blyth, Richard Holland, David Wright

Centre for Healthcare Randomised Trials, Health Services Research Unit, University of Aberdeen, 3<sup>rd</sup> floor Health Sciences Building, Foresterhill, Aberdeen, AB25 2ZD, UK Hanne Bruhn, Trial Manager

Centre of Academic Primary Care, Division of Applied Health Sciences, University of Aberdeen, Polwarth West Block, Foresterhill, Aberdeen, AB25 2ZD, UK, Christine M Bond, Professor of Primary Care: Pharmacy

Centre of Academic Primary Care, Division of Applied Health Sciences, University of Aberdeen, Polwarth West Block, Foresterhill, Aberdeen, AB25 2ZD, UK, Alison M Elliott, Senior Research Fellow

Centre of Academic Primary Care, Division of Applied Health Sciences, University of Aberdeen, Polwarth West Block, Foresterhill, Aberdeen, AB25 2ZD, UK, Philip C Hannaford, NHS Grampian Chair of Primary Care

Medical Statistics Team, Division of Applied Health Sciences, Polwarth Building, Foresterhill, Aberdeen, AB25 2ZD, UK, Amanda J Lee, Professor of Medical Statistics

Health Economics Research Unit, University of Aberdeen, Polwarth Building, Foresterhill, Aberdeen, AB25 2ZD, UK, Paul McNamee, Reader

Division of Population Health Sciences, University of Dundee, Ninewells Hospital and Medical School, Dundee, DD2 4RB, UK, Blair H Smith, Professor of Population Science

Centre of Academic Primary Care, Division of Applied Health Sciences, University of Aberdeen, Polwarth West Block, Foresterhill, Aberdeen, AB25 2ZD, UK, Margaret C Watson, Senior Research Fellow

Norwich Medical School, Faculty of Medicine and Health Sciences, University of East Anglia, Norwich Research Park, Norwich, NR4 7TJ, UK, Annie Blyth, Research Associate

Norwich Medical School, Faculty of Medicine and Health Sciences, University of East Anglia, Norwich Research Park, Norwich, NR4 7TJ, UK, Richard Holland, Professor of Public Health Medicine

School of Pharmacy, University of East Anglia, Norwich Research Park, NR4 7TJ, UK, David Wright, Chair in Pharmacy Practice

1  
2 Correspondence to: Professor CM Bond c.m.bond@abdn.ac.uk, Centre of Academic Primary  
3 Care, Division of Applied Health Sciences, University of Aberdeen, Polwarth West Block,  
4 Foresterhill, Aberdeen, AB25 2ZD, UK  
5

6  
7 The Corresponding Author has the right to grant on behalf of all authors and does grant on behalf of all  
8 authors, [a worldwide licence](#) to the Publishers and its licensees in perpetuity, in all forms, formats and  
9 media (whether known now or created in the future), to i) publish, reproduce, distribute, display and  
10 store the Contribution, ii) translate the Contribution into other languages, create adaptations, reprints,  
11 include within collections and create summaries, extracts and/or, abstracts of the Contribution, iii)  
12 create any other derivative work(s) based on the Contribution, iv) to exploit all subsidiary rights in the  
13 Contribution, v) the inclusion of electronic links from the Contribution to third party material where-  
14 ever it may be located; and, vi) licence any third party to do any or all of the above.  
15  
16  
17  
18  
19  
20  
21  
22  
23  
24  
25  
26  
27  
28  
29  
30  
31  
32  
33  
34  
35  
36  
37  
38  
39  
40  
41  
42  
43  
44  
45  
46  
47  
48  
49  
50  
51  
52  
53  
54  
55  
56  
57  
58  
59  
60

## Abstract

### Objectives

To compare the effectiveness of pharmacist medication-review, with or without pharmacist prescribing, with standard care, for patients with chronic pain.

### Design

An exploratory randomised controlled trial.

### Setting

Six general practices with prescribing pharmacists in Grampian (3) and East Anglia (3).

### Participants

Patients on repeat prescribed pain medication(4815) were screened by GPs, and mailed invitations (1397). 196 were randomised and 180 (92%) completed. Exclusion criteria included: severe mental illness, terminally ill, cancer related pain, history of addiction

### Randomisation and intervention

Patients were randomised using a remote telephone service to: (i) pharmacist medication-review with face-to-face pharmacist prescribing; or (ii) pharmacist medication-review with feedback to GP and no planned patient contact; or (iii) treatment as usual (TAU). Blinding was not possible.

### Outcome measures

Outcomes were the SF-12v2, the Chronic Pain Grade (CPG), the HUI3 and the Hospital Anxiety and Depression Scale (HADS). Outcomes were collected at 0,3,and 6 months.

Ethical approval was obtained.

### Results

In the prescribing arm (n=70) two patients were excluded/nine withdrew. In the review arm (n=63) one was excluded/three withdrew. In the TAU arm (n=63) four withdrew. Compared with baseline, patients had an improved CPG in the prescribing arm, 47.7% (21/44; p=0.003), and in the review arm, 38.6% (17/44; p=0.001), but not the TAU group, 31.3% (15/48; ns). The

1 SF-12 PCS showed no effect in the prescribing or review arms but improvement in TAU  
2 (p=0.02). The SF-12 MCS showed no effect for the prescribing or review arms and deterioration  
3 in the TAU arm (p=0.002). HADS scores improved within the prescribing arm for Depression  
4 (p=0.022) and Anxiety (p=0.007), between groups (p=0.022 and p=0.045 respectively).  
5  
6  
7  
8

#### 9 Conclusion

10 This is the first RCT of pharmacist-prescribing in the UK, and suggests there may be a benefit  
11 for patients with chronic pain. A larger trial is required.  
12  
13

14 Trial registration: [www.isrctn.org/ISRCTN06131530](http://www.isrctn.org/ISRCTN06131530). Medical Research Council funding.  
15  
16  
17  
18  
19

#### 20 *Focus:*

- 21 • Chronic pain, (lasting >3 months) affects up to half the adult population, most  
22 of whom are primarily managed in primary care but prescribing is often sub-  
23 optimal.
- 24 • Pharmacists now have prescribing rights but no published research has  
25 compared the effectiveness of their prescribing with that of GPs.
- 26 • The hypothesis was that pharmacist advice (with or without pharmacist  
27 prescribing) would lead to better outcomes than usual care  
28  
29  
30

#### 31 *Key messages:*

- 32 • The findings suggest there may be improved pain related outcomes for patients  
33 receiving pain related care from a pharmacist prescriber
- 34 • A larger trial is called for.  
35  
36

#### 37 *Strengths and Limitations*

- 38 • This the first randomised controlled trial of pharmacist prescribing in the UK  
39 looking at patient reported clinical outcomes
- 40 • The study was designed as an exploratory trial so no power calculation was  
41 done  
42  
43  
44  
45  
46  
47  
48  
49  
50  
51  
52  
53  
54  
55  
56  
57  
58  
59  
60



## Introduction

Chronic pain (pain lasting more than three months) affects up to half the adult United Kingdom (UK) population, and is considered severely limiting in about 15% of cases (1). Recovery is uncommon with nearly 80% of those identified with chronic pain at baseline still reporting chronic pain four years later (2). It adversely affects many aspects of a person's physical and psychological health, and social and economic well being (3-6).

In the UK, most patients with chronic pain present, and are managed, in primary care (7). Although non-pharmacological treatments are available, these are accessed by few patients, with mixed success (e.g. (8-10)). Analgesics prescribed in primary care remain the mainstay of treatment (4), representing substantial workload and cost. Sub-optimal prescribing may lead to poor pain control and other adverse patient outcomes. One study found that the most common medications involved in adverse drug reaction-related emergency admissions involved non-steroidal anti-inflammatory drugs (NSAIDs) (11) which are commonly used to manage pain. Improved prescribing could result in better outcomes and remove the need for more costly, scarce, alternatives.

Pharmacists working in UK general practices are well-placed to improve pain pharmacotherapy because of their expertise in therapeutics, understanding of the poly-pharmacy regimens (12) frequently used in chronic pain management, and established relationships with other primary care colleagues. In the UK National Health Service (NHS), recent regulatory changes now allow accredited pharmacists (as well as some other health care professionals such as nurses) to prescribe prescription-only medicines (POMs) (13). Pharmacists can either be qualified as supplementary prescribers, in which case they operate within an agreed clinical management plan (CMP) in partnership with the doctor and patient, or as an independent prescriber, in which case they can either prescribe completely independently or within a CMP.

However, despite the increasing number of non-medical prescribers, including pharmacists, there has been no rigorous comparisons of the outcomes of non-medical versus GP prescribing. This information is needed to assess the clinical effectiveness of different care models.

This paper reports findings from an exploratory randomised controlled trial (RCT) comparing pharmacist medication review, with or without pharmacist prescribing, with standard care for

1 patients with chronic pain. Development of the trial was informed by earlier feasibility work  
2  
3 (14,15).  
4

5  
6 The *a priori* hypothesis was that, in patients with chronic pain, pharmacist advice (with or  
7  
8 without pharmacist prescribing) would lead to better patient functioning and/or better pain  
9  
10 control at six months than treatment as usual (TAU).  
11

## 12 **Methods**

### 13 *Regulatory Issues*

14  
15 Ethical approval was granted by the National Research Ethics Service Committee – North of  
16  
17 Scotland (reference number 09/S0801/107). NHS Research and Development approval was  
18  
19 granted by NHS Grampian and East Norfolk & Waveney Research Governance Committees.  
20  
21 Patients gave informed consent before taking part.  
22  
23

### 24 *Design*

25  
26 An open, exploratory RCT in which patients were randomised to one of three study arms.  
27  
28 Participants were not blind to allocated treatment arm due to the nature of the intervention.  
29  
30

### 31 *Recruitment of practices and independent prescribing pharmacists*

32  
33 Practices in the Grampian Health Board area, Scotland (n=18) and East Anglia region of England  
34  
35 (n=4) known to have an attached Royal Pharmaceutical Society of Great Britain registered  
36  
37 independent pharmacist prescriber, were eligible to take part. From those indicating a  
38  
39 willingness to participate, convenience sampling was used to identify six general practices:  
40  
41 three in Grampian and three in East Anglia.  
42

### 43 *Patient inclusion and exclusion criteria*

44  
45 Patients registered with the recruited practices were eligible for inclusion if they were over 18  
46  
47 years of age, living in their own home, and receiving regular prescribed medication for pain.  
48  
49 Patients were identified by a computerised search (14) of the drug records of all individuals  
50  
51 registered with the practice, to identify those who had received either two or more acute  
52  
53 prescriptions, and/or one repeat prescription within the last 120 days, for an analgesic (British  
54  
55 National Formulary (BNF section 4.7) and/or non-steroidal anti-inflammatory medication  
56  
57 (NSAID) (BNF section 10.1.1). Medications which can be used for analgesia but whose primary  
58  
59 indication is not chronic pain (e.g. triptans, anti-epileptics or anti-depressants) were excluded  
60

1 as these drugs identify few additional eligible patients (16). In accordance with trial criteria,  
2 GPs excluded and recorded reasons for patients who had: a concomitant severe mental health  
3 problem or terminal illness; had suffered recent bereavement; had a known alcohol or drug  
4 addiction; suffered pain caused by cancer or other malignancy; were unable to give informed  
5 consent; other (unspecified) reasons.  
6  
7  
8  
9

#### 10 *Patient recruitment*

11 Eligible patients were sent an invitation pack (letter, information sheet, consent form) by  
12 practice staff between March and June 2010. Consent forms were returned directly to the  
13 researchers, who sent out a baseline questionnaire. Patients returning completed  
14 questionnaires were randomised by the researcher using a telephone randomisation service  
15 with a random number allocation which ensured allocation concealment. The allocation  
16 sequence was 1:1:1.  
17  
18  
19  
20  
21  
22  
23

#### 24 *Intervention*

25 All participating pharmacists took part in a two-day course updating them about pain  
26 management. As part of the training, participants defined and agreed the treatment algorithm  
27 they would all use.  
28  
29  
30  
31

32 'Prescribing' arm: Pharmacists invited patients to a face-to-face consultation. Prior to the  
33 consultation, pharmacists completed a paper-based medication review of each patient's  
34 medical record and patients were asked to complete a pain diary to inform the consultation. A  
35 pharmaceutical care plan was agreed between the pharmacist and the patient. The plan  
36 assessed and documented relevant past medical history and current conditions; known  
37 allergies and adverse drug reactions; relevant laboratory results; pain-related medications  
38 prescribed in the previous 10 years; current pain related prescription medications; current  
39 symptoms; lifestyle issues, including units of alcohol consumed per week; recommendations  
40 for changes to medication (if any); whether non-pharmaceutical treatments had been  
41 considered; and, any other relevant issues. Copies of the pain diary and pharmaceutical care  
42 plan are available from the authors on request. At the end of the consultation any required  
43 prescriptions for medicines were issued by the pharmacist. Due to Controlled Drug (CD)  
44 regulations in place at the time, prescribing for CDs was done using a supplementary  
45 prescribing Clinical Management Plan (17), rather than independent prescribing. Patients were  
46 followed up either by phone or face-to-face, at each pharmacist's discretion.  
47  
48  
49  
50  
51  
52  
53  
54  
55  
56  
57  
58  
59  
60

1  
2 'Review arm': The pharmacists conducted a paper-based medication review focussed on pain-  
3 related prescription medications, before creating a pharmaceutical care plan which detailed  
4 any recommendations for medication changes. The plan was passed to the patient's GP for  
5 implementation. The GPs were asked subsequently about actions taken as a result of the  
6 recommendations.  
7  
8  
9

10  
11 Treatment as usual (TAU): Patients received standard general practice care.  
12  
13

#### 14 *Outcome measures*

15 A core aim of this exploratory randomised controlled trial (RCT) was to finalise the selection of outcome  
16 measures for a subsequent multi-centred RCT. In the Current Controlled Trials Registration  
17 (ISRCTNO6131530) we specified both primary and secondary outcome measures (primary: SF12, HUI ;  
18 secondary: CPG, HADS) based on our judgement following the earlier feasibility study (15). However in  
19 practice, all outcomes were considered equal and no single measure was defined as the primary  
20 outcome, for example, for the purpose of a sample size calculation (see below). These four outcome  
21 measures are described below. Inclusion of both pain specific and generic outcome measures was  
22 based on Initiative on Methods, Measurement, and Pain Assessment in Clinical Trials  
23 (IMMPACT) recommendations (18) and an earlier feasibility study (15).  
24  
25  
26  
27  
28  
29

30 The SF-12v2 is a generic health and functioning scale (19), previously used in population-based  
31 studies of pain (20,21). A Physical (PCS) and Mental Component Score (MCS) was calculated,  
32 ranging from 0 to 100; a higher score indicates better functioning.  
33  
34  
35  
36

37 The Health Utilities Index (HUI3) is a preference-based system for measuring comprehensive  
38 health status and health-related quality of life (HRQL) (22). It provides descriptive evidence and  
39 a score for each dimension of health (vision, hearing, speech, ambulation/mobility, pain,  
40 dexterity, self-care, emotion and cognition) and a HRQL score for overall health. Each  
41 dimension has 3- 6 levels. Owing to the cost of the additional license fee to score data from  
42 this measure, this instrument was not subsequently analysed.  
43  
44  
45  
46

47 The CPG (23) is a seven item scale which assesses pain severity on two dimensions: disability  
48 and intensity. The scale classifies pain according to level of intensity and disability (I (low  
49 disability-low intensity) to IV (high disability-severely limiting)).  
50  
51  
52  
53  
54  
55  
56  
57  
58  
59  
60

1  
2 The Hospital Anxiety and Depression Scale (HADS) (24) is a 14-item screening instrument which  
3 identifies the possible and probable caseness of anxiety (7 items (HADS-A)) and depression (7  
4 items (HADS-D)); each item scored from 0 (not present) to 3 (highly present). Standard  
5 thresholds and previously used labels (25) were applied (no depression/anxiety (0-7), mild (8-  
6 10), moderate (11-15) or severe (>15)).  
7  
8  
9

#### 10 11 12 *Data collection*

##### 13 14 *Participant questionnaires*

15 Questionnaires were posted to participants at baseline (pre-randomisation), and 3 and 6  
16 months post-randomisation (follow-up was conducted between July 2010 and January 2011).  
17 Up to two reminders were sent. Questionnaire content included the outcome measures  
18 described above together with items on: demographic status (baseline only); screening items  
19 to confirm eligibility (baseline only); duration of pain condition (baseline only); location of pain;  
20 Morisky Medication Adherence Scale 4 (MMAS-4) (26); participant satisfaction (11 statements  
21 derived from the feasibility study for the prescribing arm (3 months only) and additional  
22 comments by participants. The MMAS-4 provides a score of self-reported adherence to  
23 medication regimen. Scores range from 0 (low adherence) to 4 (high adherence).  
24  
25  
26  
27  
28  
29  
30  
31

##### 32 33 *Follow-up interviews with staff*

34 Post-intervention, all pharmacists and all GPs in participating practices were invited to take part  
35 in semi-structured interviews, carried out face-to-face when possible, otherwise by telephone.  
36 Interviews were taped, transcribed verbatim and content analysis was carried out.  
37  
38  
39

##### 40 41 *Sample size*

42 As this was an exploratory trial to estimate the effect size for a larger trial, no formal sample  
43 size calculation was possible (27). We aimed to recruit 30 participants per practice (n=180)  
44 (with an additional six per practice for training purposes i.e. 216 in total. This was deemed  
45 sufficient to give reliable effect size estimates for the outcome measures of health status or  
46 chronic pain grade..  
47  
48  
49  
50

##### 51 52 *Data management and analysis*

53 Data were entered into identical SPSS databases at each site and accuracy checks carried out  
54 on 10% before databases were merged. Descriptive statistics included means and standard  
55 deviations (SD) for normally distributed continuous data, medians (interquartile range (IQR))  
56  
57  
58  
59  
60

1  
2 for skewed continuous data and percentages (n) for categorical data. Analysis was conducted  
3 on an intention-to-treat basis for participants with complete data on relevant measures using  
4 SPSS version 18.  
5  
6

7  
8  
9 Exploratory analyses for parametric data included the paired t-test for within-arm comparisons  
10 of mean difference between baseline and 6 months and one-way ANOVA for between arm  
11 comparisons of mean difference. For non-parametric data it included the Wilcoxon Signed  
12 Rank test for within-arm comparisons of median difference and the Kruskal Wallis test for  
13 between arm comparisons of median difference. Categorical data was analysed using the  
14 marginal homogeneity test for within-arm comparisons (with null hypothesis that the  
15 distribution of CPG grade or HADS group does not change between baseline and 6 month  
16 follow-up) and the Chi-squared test for between arm comparisons; analyses reported here are  
17 based on 6 month follow-up data (other than for participant experiences). Within arm effect  
18 sizes, expressed in terms of a Pearson correlation coefficient (r) have been calculated using the  
19 formulas from Rosenthal (1991) (28). Effect sizes can be directly compared using Cohen's  
20 (1988) (29) criteria of  $r=0.1$  (small effect);  $r=0.3$  (medium effect) and  $r=0.5$  (large effect).  
21  
22  
23  
24  
25  
26  
27  
28  
29  
30

## 31 **Results**

### 32 *Response rates and demography*

33  
34 Six of the seven practices approached participated. GPs excluded 12% (392/3281) of patients,  
35 mostly those with dementia. There was no statistically significant difference between  
36 participants and non-participants in terms of age, gender, and index of multiple deprivation.  
37 Figure 1 shows the flow of participants through the study. Overall, the consent rate was 25%  
38 (356/1397) and the recruitment rate was 14% (196/1397).  
39  
40  
41  
42  
43  
44

45 [INSERT FIGURE 1 HERE]

46  
47 Eighty six percent of participants (251/289) returned baseline questionnaires, of whom 232  
48 were randomised (36 participants were randomised to one of the two intervention arms for  
49 training purposes and were not included in any further analysis and 19 were not included as  
50 recruitment target had been met). The overall follow-up rate at 3 months was 86%  
51 (161/187) and at 6 months 84% (152/180).  
52  
53  
54  
55  
56  
57  
58  
59  
60

1  
2 As shown in Table 1, groups were similar at baseline for demographic and socioeconomic  
3 variables and pain data. Most participants were married, Caucasian and female, older (mean  
4 (SD) age 65 (12.6) years), had an annual income of <£25,000 and had suffered from pain for at  
5 least five years. Most (57%;103/181) reported being fully adherent to their medication  
6 regimen (MMAS-4, median 4.0 (IQR 3.0- 4.0)) (15 missing MMAS scores).  
7  
8  
9

10  
11 [INSERT TABLE 1 HERE]  
12

13  
14 In the prescribing arm, 78% (53/68) attended an initial prescribing consultation, 31 had at least  
15 one planned follow-up (of which 34/37 were conducted by phone) and 130 recommendations  
16 were made for 92% (49/53) of participants seen. Examples are shown in Box 1. The median  
17 time taken for the note-based record review was 35 minutes (IQR 20.0, 45.0), the consultation  
18 was 30 minutes (IQR 20.0, 40.0), careplan preparation 10 minutes (IQR 10.0, 20.0) and median  
19 duration of follow-ups was 10 minutes (IQR 5.0- 15.0).  
20  
21  
22  
23

24  
25 [INSERT BOX 1 HERE]  
26  
27

28 In the review arm 97% (60/62) of participants' records were reviewed (note there was one post  
29 randomisation exclusion) for whom 197 recommendations were made. Where GP feedback  
30 was provided (n=48), they generally agreed with pharmacists' recommendations, which were  
31 fully implemented for 20 participants (two by the pharmacist following request by GP), partially  
32 for 19 participants and not at all for nine participants. The median time taken for the note-  
33 based record review was 30 minutes (IQR24.3, 45.0), and careplan preparation was 10  
34 minutes (IQR 5.0, 20.0).  
35  
36  
37  
38  
39  
40  
41  
42

#### 43 *Clinical outcome measures*

44 Table 2 shows the mean (SD) or median (IQR) of the CPG for each arm at baseline and 6 month  
45 follow-up. Table 3 shows the SF-12 scores and Table 4 shows the HADS-A and HADS-D results.  
46  
47  
48

49 [INSERT TABLE 2,3,4, HERE]  
50

51 In the prescribing arm, there was a statistically significant within arm improvement for the CPG  
52 intensity (p=0.002, effect size (r)=0.45) and disability (p=0.003, effect size (r)=0.43) subscales,  
53 and between arms on the intensity sub-scale (p=0.02), but not the disability subscale (p=0.55)  
54 (Table 2). There was a significant within-arm improvement in overall CPG grade in the  
55  
56  
57  
58  
59  
60

1  
2 prescribing (p=0.003) and review arm (p=0.001), but not in the TAU arm. The SF-12 Physical  
3 Component Score showed a statistically significant within arm improvement in the TAU arm  
4 (p=0.02, effect size (r)=0.35) (Table 3), but not between trial arms. The SF-12 Mental  
5 Component Score showed a statistically significant deterioration in the TAU arm (p=0.002,  
6 effect size (r)=0.45)(Table 3), as did the HADS-D (p=0.03, Table 4). Analysis was also carried out  
7 on the non-categorised HADS scores which showed a statistically significant improvement  
8 within the prescribing arm for Depression (p=0.022) and Anxiety (p=0.007). These were both  
9 significant between groups (p=0.022 and p=0.045 respectively) (Table 5).

### 16 *Acceptability of the pharmacist prescribing intervention*

17 All six pharmacists and 56% of the GPs (23/41) were interviewed. All pharmacists and most GPs  
18 were positive about the intervention, although some GPs suggested that the pharmacists'  
19 recommendations had been minor and questioned the cost-effectiveness of the service.  
20 Patient participants were generally positive about the pharmacist prescribing service although  
21 some concerns were identified, as illustrated by the quotes shown in Box 2.

22 [INSERT BOX 2 HERE]

## 28 **Discussion**

### 30 *Principal findings*

31 This exploratory RCT of pharmacist-led management of patients with chronic pain suggests that  
32 pharmacist prescribing (and possibly pharmacist review alone) may be effective in improving  
33 pain-related outcomes and be acceptable to both patients and most professionals. There was  
34 an indication of a positive effect on emotional health, but no measurable effect on general  
35 health.

### 36 *Strengths and weaknesses*

37 This was the first RCT to assess clinical and humanistic outcomes after pharmacist prescribing  
38 for any clinical condition compared to usual GP care, and the first RCT to specifically assess  
39 pharmacist-led management of chronic pain, compared with usual GP care. It was based on  
40 extensive development and feasibility work (14,15) in line with MRC framework for  
41 development and evaluation of complex interventions (30). A range of validated outcome  
42 measures was included, as well as a parallel qualitative process evaluation which assessed  
43 satisfaction and acceptability. The inclusion of six practices and their associated pharmacists  
44  
45  
46  
47  
48  
49  
50  
51  
52  
53  
54  
55  
56  
57  
58  
59  
60



1 from both Scotland and England increased the generalisability of the findings. Pharmacists  
2 received formal training and agreed and used a common treatment algorithm which should  
3 have increased standardisation of treatment. The preponderance of females (overall 62%) and  
4 average age of 65 years reflects the wider chronic pain population (1) as does the distribution  
5 of pain site (31,32)  
6  
7  
8  
9

10  
11 There were, however limitations. Although high follow-up response rates were achieved at  
12 both three (86%) and six months (85%) only 25% of eligible patients entered the trial. This low  
13 initial consent rate is in line with other studies (33,34), but may cause unknown biases  
14 including problems of generalisability, as does the solely Caucasian ethnicity. Concerns  
15 identified by participants during the formal feedback e.g. having too many people involved in  
16 one's care may have contributed to poor response rates and rewording of participant  
17 recruitment documentation to reassure participants of the role of the pharmacist could  
18 address this. More participants withdrew in the prescribing arm compared with the other two  
19 arms, which might be attributed to the need for an additional practice visit. The study was an  
20 exploratory trial so no formal power calculation was undertaken. However, because there  
21 were no published MIDAs available to estimate effect size for the outcomes in this population, it  
22 was important to present the actual clinical magnitude of change in outcome at 6 months  
23 alongside a statistical assessment of this change (p-value). This allows an assessment of both  
24 clinical and statistical significance simultaneously with the caveat that this is an exploratory  
25 study. With around 50 patients per arm, this was deemed sufficient numbers to examine the  
26 change in outcome measures with appropriate within and between group univariate statistical  
27 tests. Due to the nature of the intervention, no participants were blind to their group  
28 allocation, and so some outcomes, especially the qualitative components, may have been  
29 affected by social desirability bias.  
30  
31  
32  
33  
34  
35  
36  
37  
38  
39  
40  
41  
42  
43  
44  
45

46 Our outcome measures were self-reported, but this is the norm in pain studies as pain is a  
47 subjective experience (18). Furthermore we do not know how important the observed  
48 differences were to participants. Following precedents set in previous research (25), and  
49 because there is no consensus on an alternative measure (35) we used the HADS as a tool to  
50 classify people by severity of depression and anxiety. However it is strictly a screening tool, and  
51 the four levels of severity have not been formally validated. We therefore also compared  
52 outcomes using it as a continuous scale.  
53  
54  
55  
56  
57  
58  
59  
60

### *Relationship with other studies*

This study is important because no other RCT has evaluated pharmacist prescribing and few studies, and importantly no RCTs, have evaluated pharmacist interventions for pain. In pharmacist prescribing most research has focussed on reported experiences of professionals and patients, and not used validated outcome measures. Yet pharmacist prescribing is now widely practised. For pain, there have been a few small studies. Briggs et al (2008) (36) conducted a small before-and-after evaluation (involving 65 patients) of a nurse and pharmacist-led chronic pain clinic in primary care. Pain intensity Visual Analogue Scale scores reduced significantly over six months. Another evaluation of 26 patients using a medication review service provided jointly by a physiotherapist and pharmacist in the UK, reported improvement in pain control for 88% of patients (37).

The CPG was found to show a graded effect across the three arms, showing discrimination with both direction and strength of improvement, suggesting maximum benefit for those in the pharmacist prescribing arm. However, the reduction in overall score appears to be mediated by a change in the intensity of pain subscale rather than in pain-related disability. The effect size of 0.45 suggests this could be an important difference. In contrast, the SF-12, a measure of general health and functionality showed no significant difference between intervention arms, reflecting either no effect or or lack of power to detect an effect.

Whilst most participants in this study were already within the normal range on the HADS scale, and therefore had minimal chance of improvement, there were nonetheless suggestions of better outcomes in participants in the prescribing arm. Including a range of instruments is in line with IMMPACT recommendations (38), which state that focus should be on the whole person, not just about pain. However, this needs to be balanced with minimising participant burden.

### *Explanations, implications, and future research*

The number of pharmacists' recommendations per participant was higher in the review arm than in the prescribing arm. This might seem contradictory to the possible greater benefit found in the prescribing arm. However, in the prescribing arm pharmacists met the participant and may have more readily identified and dismissed suggestions previously tried. The interview feedback highlighted that some recommendations for change, whilst sensible, had been tried already. This might also be the reason why there were only 60% of pharmacist

1  
2 recommendations with which the GP fully agreed. Self-reported adherence to medication at  
3 baseline was good. Despite this, the pharmacists still improved pain outcomes in the  
4 prescribing arm. This could have been due to changes in medications and/or participant  
5 education about optimal timing for administration of analgesic medicines. Further research is  
6 needed to confirm the beneficial effect of pharmacist prescribing and its sustainability.  
7  
8  
9

### 11 **Conclusion**

12 Our results suggest that pharmacist prescribing (and possibly pharmacist review alone) for  
13 patients with chronic pain is feasible, acceptable and may lead to improvements in pain and  
14 other measures. A larger fully-powered trial is now needed to confirm these findings.  
15  
16  
17

### 19 **Data sharing statement**

20 Consent was not obtained from participants for data sharing; the presented data are  
21 anonymised and there is no risk of individual identification. Requests for data should be made to  
22 the contact author who will provide this in a format in which risk of patient identification will be  
23 minimal.  
24  
25  
26  
27

### 28 **Conflict of interest statement**

29 All authors have completed the Unified Competing Interest form at  
30 [www.icmje.org/coi\\_disclosure.pdf](http://www.icmje.org/coi_disclosure.pdf) (available on request from the corresponding author) and  
31 declare: no support from any organisation for the submitted work; no financial relationships  
32 with any organisations that might have an interest in the submitted work in the previous 3  
33 years; no other relationships or activities that could appear to have influenced the submitted  
34 work.  
35  
36  
37  
38  
39

### 41 **Authors' contributions**

42 HB and CB drafted the manuscript.  
43  
44

### 45 **All authors:**

- 46  
47  
48  
49 1) made substantial contributions to conception and design, or acquisition of data, or analysis  
50 and interpretation of data;  
51  
52  
53 2) were involved in drafting the manuscript or revising it critically for important intellectual  
54 content; and  
55  
56  
57  
58  
59  
60

1  
2  
3  
4  
5  
6  
7  
8  
9  
10  
11  
12  
13  
14  
15  
16  
17  
18  
19  
20  
21  
22  
23  
24  
25  
26  
27  
28  
29  
30  
31  
32  
33  
34  
35  
36  
37  
38  
39  
40  
41  
42  
43  
44  
45  
46  
47  
48  
49  
50  
51  
52  
53  
54  
55  
56  
57  
58  
59  
60

3) have given final approval of the version to be published.

### Acknowledgements

We thank the participating patients, practices and pharmacists. We would also like to thank Kirsten Harrild (Medical Statistics, UOA) for statistical support. Rick Adams (School of Pharmacy, UEA) helped design and deliver the pharmacist training and Lesley Thomson (NHS Grampian) helped design the pharmacist data collection forms. The patient postal questionnaire was based on work by Nicola Cooper and the Norfolk Arthritis Register (NOAR) research team. The Pharmacy-Led Management of Chronic Pain Study Team acknowledges the financial support of NHS Research Scotland (NRS), through Scottish Primary Care Research Network Northeast. The work was conducted as part of the Aberdeen Pain Research Collaboration. The project was funded by the Medical Research Council. They had no further involvement in any aspect of study conduct; all researchers were independent of the funding body.

All authors had access to all of the study data and can take responsibility for the integrity of the data and the accuracy of the data analysis.

### References

- (1) Elliott AM, Smith BH, Penny KI, et al. The epidemiology of chronic pain in the community. *Lancet* 1999;354:1248-1252.
- (2) Elliott AM, Smith BH, Hannaford P, et al. The course of chronic pain in the community: results of a 4-year follow-up study. *Pain* 2002;99:299-307.
- (3) Becker N, Bondegaard Thomsen A, Olsen AK, et al. Pain epidemiology and health related quality of life in chronic non-malignant pain center patients referred to a Danish multidisciplinary. *Pain* 1997;73:393-400.
- (4) Breivik H, Collett B, Ventafridda V, Cohen R, Gallacher D. Survey of chronic pain in Europe: prevalence, impact on daily life, and treatment. *Eur J Pain* 2006;10:287-333.
- (5) Gureje O, Von Korff M, Simon GE, et al. Persistent pain and well-being: a World Health Organization Study in Primary Care. *JAMA* 1998;280:147-151.
- (6) Magni G, Marchetti M, Moreschi C, et al. Chronic musculoskeletal pain and depressive symptoms in the National Health and Nutrition Examination. I. Epidemiologic follow-up study. *Pain* 1993;53:163-168.
- (7) Sullivan MD, Turner JA, Romano J. Chronic pain in primary care: identification and management of psychological factors. *J Fam Pract* 1991;32:193-199.

- 1  
2 (8) Green S, Buchbinder R, Hetrick SE. Physiotherapy interventions for shoulder pain. Cochrane  
3 Database of Syst Rev 2010(9):Art. No.: CD004258. DOI: 10.1002/14651858.CD004258.  
4
- 5 (9) Eccleston C, Williams, A. C. D. C., Morley S. Psychological therapies for the management of  
6 chronic pain (excluding headache)  
7 in adults. Cochrane Database Syst Rev 2009 Apr 15;(2):CD007407. DOI:  
8 10.1002/14651858.CD007407.pub2.  
9
- 10 (10) Haetzman M, Elliott AM, Smith BH, et al. Chronic pain and the use of conventional and  
11 alternative therapy. Family Practice 2003;20(2):147-154.  
12
- 13 (11) Pirmohamed M, James S, Meakin S, et al. Adverse drug reactions as cause of admission to  
14 hospital: prospective analysis of 18 820 patients. BMJ 2004;329:15.  
15
- 16 (12) Krska J, Cromarty JA, Arris F, et al. Pharmacist-led medication review in patients over 65: a  
17 randomized, controlled trial in primary care. Age and Ageing 2001;30:205-211.  
18
- 19 (13) Department of Health. Improving patients' access to medicines: A guide to implementing  
20 nurse and pharmacist independent prescribing within the NHS England. Department of Health  
21 2006.  
22
- 23 (14) McDermott ME, Smith BH, Elliott AM, et al. The use of medication for chronic pain in  
24 primary care, and the potential for intervention by practice-based pharmacist. Family Practice  
25 2006;23:46-52.  
26
- 27 (15) Bruhn H, Bond CM, Elliott AM, et al. Developing an RCT of general practice-based,  
28 pharmacist-led, management of chronic pain: the PIPPC study. IJPP 2010;18(Supplement 2).  
29
- 30 (16) Smith BH, Read JRM, Chambers WAC, et al. Researching chronic pain: identification of a  
31 community based sample. The Pain Clinic 1996;9:73-76.  
32
- 33 (17) Department of Health. Supplementary prescribing by nurses and pharmacists within the  
34 NHS in England: A guide for implementation. Department of Health 2003.  
35
- 36 (18) Turk DC, Dworkin RH, Allen RR, et al. Core outcome domains for chronic pain clinical trials:  
37 IMMPACT recommendations. Pain 2003 12;106(3):337-345.  
38
- 39 (19) Ware JE, Kosinski M, Turner-Bowker DM, et al. User's Manual for the SF-12v2 Health  
40 Survey. Second edition ed.: QualityMetric, Incorporated, 2009; 2009.  
41
- 42 (20) Nicholl BI, Macfarlane GJ, Davies KA, et al. Premorbid psychosocial factors are associated  
43 with poor health-related quality of life in subjects with new onset of chronic widespread pain -  
44 results from the EPIFUND study. Pain 2009;141:119-126.  
45
- 46 (21) Carmona L, Ballina J, Gabriel R, et al. The burden of musculoskeletal diseases in the  
47 general population of Spain: results from a national survey. Ann Rheum Dis 2001;60:1040-1045.  
48  
49  
50  
51  
52  
53  
54  
55  
56  
57  
58  
59  
60

- 1  
2 (22) Feeny, David, "Preference-Based Measures: Utility and Quality-Adjusted Life Years,"  
3 Chapter 6.2 in Peter Fayers and Ron Hays, eds., *Assessing Quality of Life in Clinical Trials*,  
4 Second Edition, Oxford, Oxford University Press, 2005, pp 405-429.  
5
- 6 (23) Von Korff M, Ormel J, Keefe FJ, et al. Grading the severity of chronic pain. *Pain*  
7 1992;50:133-149.  
8
- 9 (24) Zigmond AS, Snaith RP. The hospital anxiety and depression scale. *Acta Psychiatr Scand*  
10 1983 Jun;67(6):361-370.  
11
- 12 (25) Snaith RP, Zigmond AS. *HADS: Hospital Anxiety and Depression Scale*. Windsor: NFER  
13 Nelson; 1994.  
14
- 15 (26) Morisky DE, Green LW, Levine DM. Concurrent and predictive validity of a self-reported  
16 measure of medication adherence. *Med Care* 1986 Jan;24(1):67-74.  
17
- 18 (27) Lancaster GA, Dood S, Williamson PR. Design and analysis of pilot studies:  
19 recommendations for good practice. *J Eval Clin Pract* 2004;10(2):307-312.  
20
- 21 (28) Rosenthal R. *Meta-analytic procedures for social research (revised)*. Newbury Park, CA.  
22 Sage 1991.  
23
- 24 (29) Cohen J. *Statistical power analysis for the behavioural sciences (2<sup>nd</sup> edition)*. New York.  
25 Academic Press. (30) Craig P, Dieppe P, Macintyre S, Michie S, Nazareth I, Petticrew M.  
26 *Developing and evaluating complex interventions: the new Medical Research Council guidance*.  
27 *BMJ* 2008;337:a1655.  
28
- 29 (31) Magni M, Caldieron C, Rigatti-Luchini S, et al. Chronic musculo-skeletal pain and depressive  
30 symptoms in the general population. An analysis of the 1st National Health and Nutrition  
31 Examination Survey data. *Pain* 1990; 43: 299-307  
32
- 33 (32) Gureje O, Von Korff M, Simon GE, et al. Persistent pain and well-being. A World Health  
34 Organization study in primary care. *Journal of the American Medical Association* 1998; 280:  
35 147-151.  
36
- 37 (33) Community Pharmacy Medicines Management Project Evaluation Team. The MEDMAN  
38 study: a randomized controlled trial of community pharmacy-led medicines management for  
39 patients with coronary heart disease. *Family Practice* 2007;24:189-200.  
40
- 41 (34) Treweek S, Mitchell E, Pitkethly M, et al. Strategies to improve recruitment to randomised  
42 controlled trials. *Cochrane Database Syst Rev* 2010;(4):MR000013 2011.  
43
- 44 (35) Cameron IM, Cardy A, Crawford JR, et al. Measuring depression severity in general  
45 practice: discriminatory performance of the PHQ-9, HADS-D, and BDI-II. *Br J Gen Pract*  
46 2011;61:e419-e426(8).  
47
- 48 (36) Briggs M, Closs SJ, Marczewski K, et al. A feasibility study of a combined nurse/pharmacist-  
49 led chronic pain clinic in primary care. *Qual Prim Care* 2008;16:91-94.  
50  
51  
52  
53  
54  
55  
56  
57  
58  
59  
60

1  
2 (37) Anonymous. Pharmacist and physiotherapist-led community outreach pain programme  
3 improve quality of life. The Pharmaceutical Journal 2005;275:14.  
4

5 (38) Turk DC, Dworkin RH, Revicki D, et al. Identifying important outcome domains for chronic  
6 pain clinical trials: An IMMPACT survey of people with pain. 2008;137:276-285.  
7  
8  
9  
10  
11  
12  
13  
14  
15  
16  
17  
18  
19  
20  
21  
22  
23  
24  
25  
26  
27  
28  
29  
30  
31  
32  
33  
34  
35  
36  
37  
38  
39  
40  
41  
42  
43  
44  
45  
46  
47  
48  
49  
50  
51  
52  
53  
54  
55  
56  
57  
58  
59  
60

For peer review only

Figure 1: CONSORT Flow Diagram

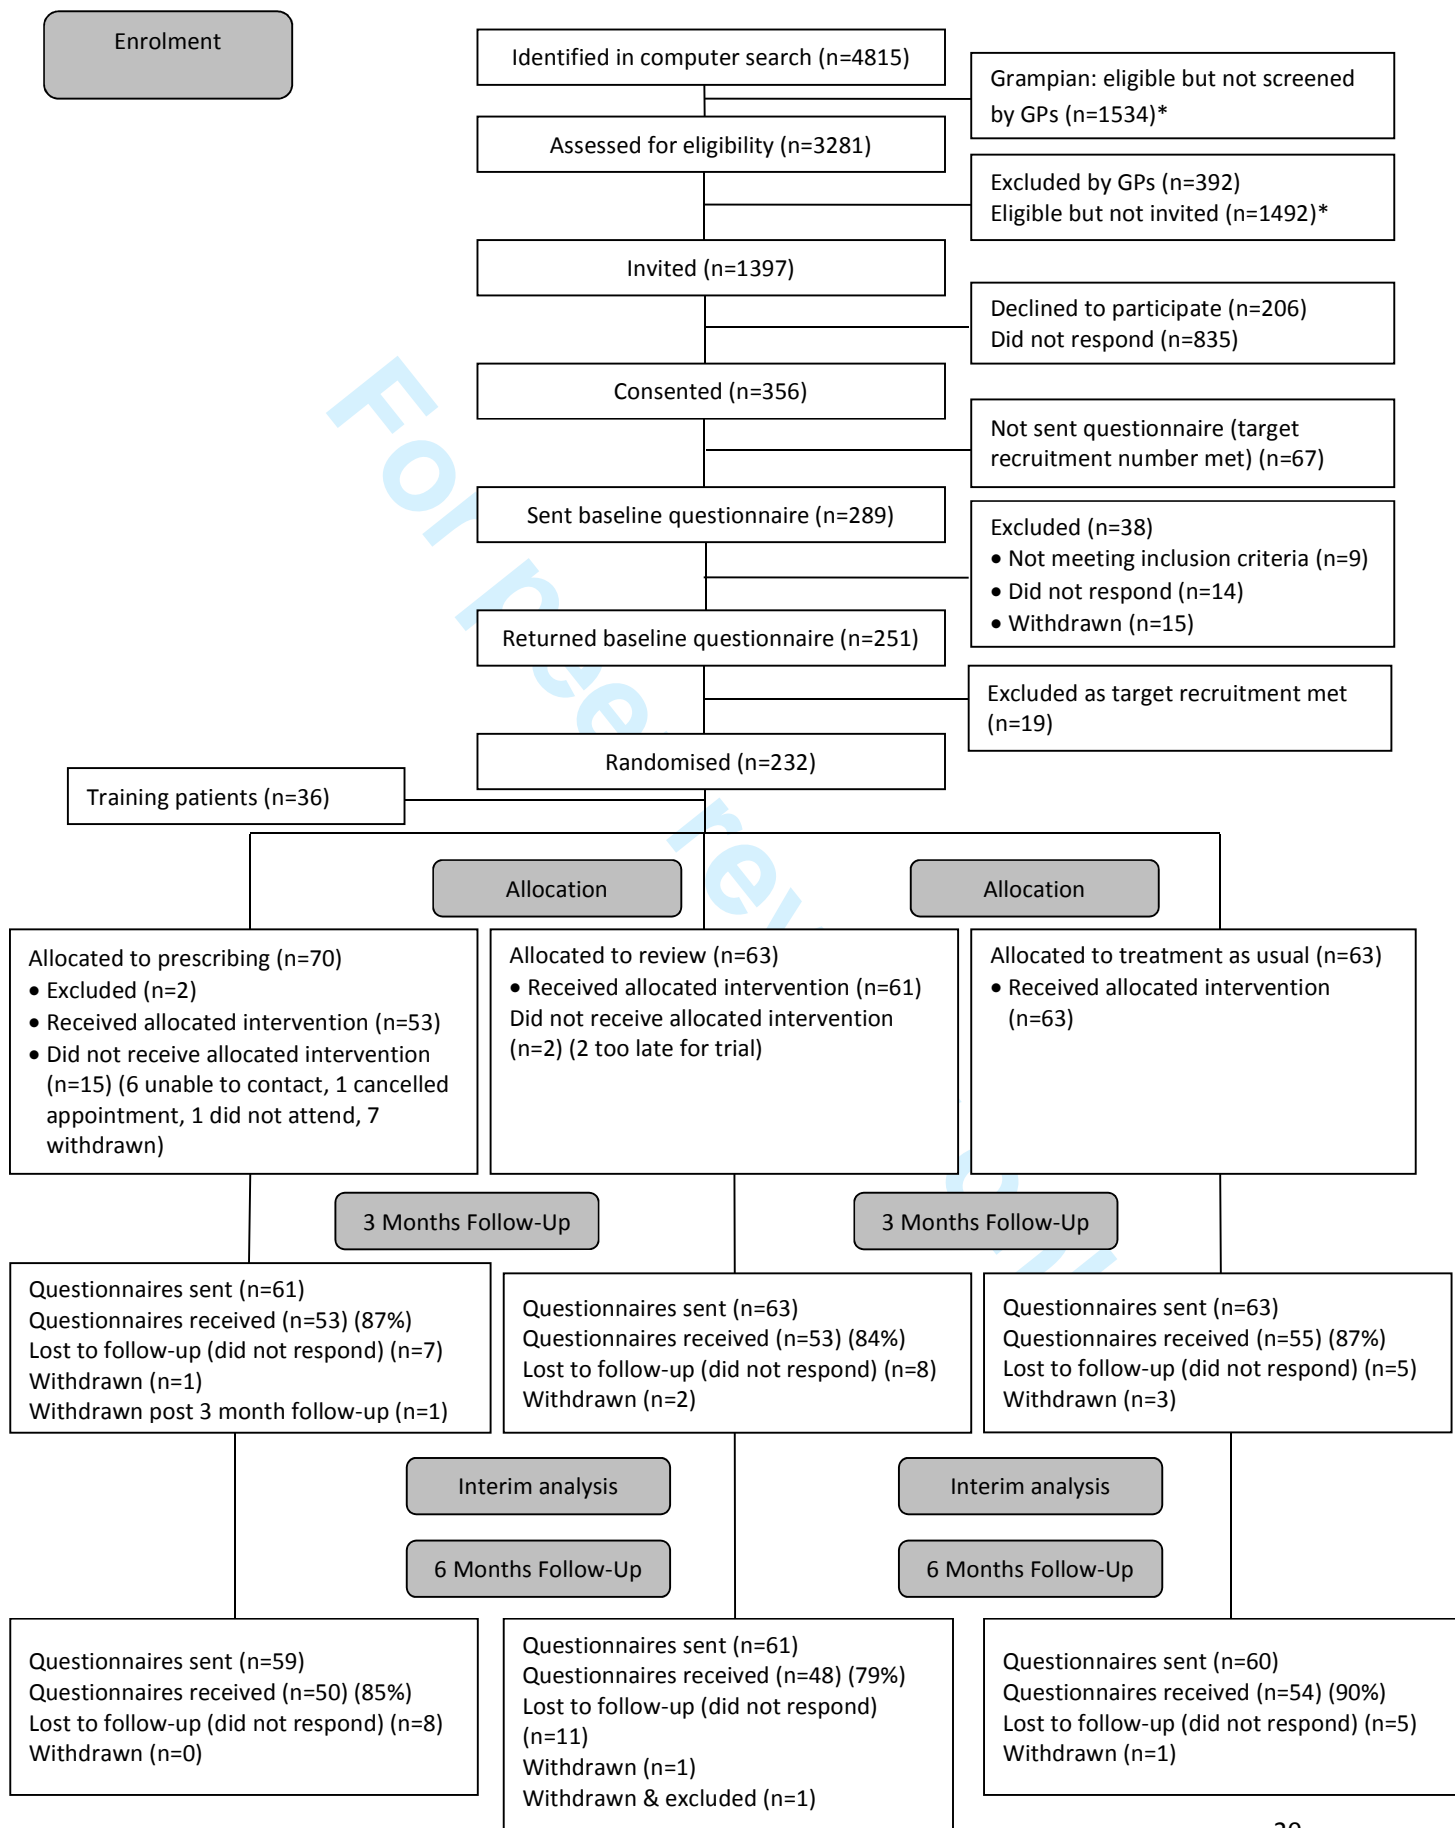



1  
2  
3  
4  
5  
6  
7  
8  
9  
10  
11  
12  
13  
14  
15  
16  
17  
18  
19  
20  
21  
22  
23  
24  
25  
26  
27  
28  
29  
30  
31  
32  
33  
34  
35  
36  
37  
38  
39  
40  
41  
42  
43  
44  
45  
46  
47  
48  
49  
50  
51  
52  
53  
54  
55  
56  
57  
58  
59  
60

\*In the **Grampian Health Board area**, on the basis of response rates in the earlier feasibility study (241 screened patients resulted in 22 recruited) only a random sample of eligible participants were screened (15). In East Anglia all eligible patients were screened.

For peer review only

**Table 1:** Baseline demographic, socio-economic and pain data of patients by study arm, prescribing, review and treatment as usual (TAU)

|                                           | Prescribing* | Review*     | TAU*        |
|-------------------------------------------|--------------|-------------|-------------|
|                                           | (n = 68)     | (n = 62)    | (n = 63)    |
| Age: mean (SD)                            | 66.1 (12.1)  | 65.7 (14.2) | 64.9 (11.6) |
| Missing                                   | 1            | 1           | 0           |
| Gender (% female)                         | 54.4 (37)    | 74.2 (46)   | 58.7 (37)   |
| <i>Marital status</i>                     |              |             |             |
| Married                                   | 43           | 30          | 41          |
| Single                                    | 6            | 6           | 3           |
| Divorced/widow                            | 10           | 21          | 13          |
| Other                                     | 6            | 4           | 6           |
| Missing                                   | 3            | 1           | 0           |
| <i>Highest educational level achieved</i> |              |             |             |
| No qualifications                         | 30           | 27          | 21          |
| O grade or equivalent                     | 12           | 6           | 14          |
| Higher/A-level/NVQ3/SVQ3                  | 6            | 8           | 7           |
| Tertiary education/NVQ4/NVQ5              | 18           | 17          | 14          |
| Other                                     | 2            | 1           | 4           |
| Missing                                   | 0            | 3           | 3           |
| <i>Employment status</i>                  |              |             |             |
| Employed                                  | 16           | 14          | 9           |
| Unemployed                                | 3            | 5           | 1           |
| Retired                                   | 38           | 35          | 34          |
| Long term sick/disabled                   | 7            | 5           | 9           |
| Other                                     | 3            | 2           | 7           |
| Missing                                   | 1            | 1           | 3           |
| <i>Household annual income before tax</i> |              |             |             |
| Less than £9,999                          | 13           | 15          | 10          |
| £10,000 - £14,999                         | 14           | 18          | 22          |
| £15,000 - £24,999                         | 14           | 12          | 12          |
| £25,000 – or more                         | 22           | 11          | 8           |
| Missing                                   | 5            | 6           | 11          |
| <i>Ethnic group</i>                       |              |             |             |
| Caucasian                                 | 67           | 62          | 61          |
| Other                                     | 1            |             |             |
| Missing                                   | 0            | 0           | 2           |
| <i>Pain duration</i>                      |              |             |             |
| < 1 year                                  | 3            | 2           | 4           |
| 1 – 3 years                               | 12           | 12          | 7           |
| 3 – 5 years                               | 10           | 13          | 9           |
| 5 – 10 years                              | 17           | 13          | 15          |
| > 10 years                                | 26           | 22          | 28          |
| <i>Pain localisation (% , n)</i>          |              |             |             |
| Back                                      | 27.9 (19)    | 32.3 (20)   | 20.6 (13)   |
| Neck, shoulders                           | 7.4 (5)      | 9.7 (6)     | 9.5 (6)     |
| Limbs or hips                             | 42.6 (29)    | 30.6 (19)   | 50.8 (32)   |
| Other                                     | 8.8 (6)      | 4.8 (3)     | 7.9 (5)     |
| Missing                                   | 9            | 14          | 7           |

\*Denominator based on numbers allocated to the specific arms, minus any exclusions due to protocol violations.

**Table 2:** Mean (standard deviation, SD) CPG intensity, median (interquartile range, IQR) CPG disability, and count CPG grade at baseline, 6 months follow-up and difference between the two assessment points for each arm, prescribing, review and treatment as usual (TAU). P-values for within and between arm differences are also reported.

|                                  | Prescribing |                   | Review |                    | TAU |                   | P (between groups***) |
|----------------------------------|-------------|-------------------|--------|--------------------|-----|-------------------|-----------------------|
|                                  | n*          | Mean (SD)         | n*     | Mean (SD)          | n*  | Mean (SD)         |                       |
| Baseline CPG intensity           | 47          | 66.1 (16.0)       | 45     | 68.4 (17.6)        | 54  | 65.4 (18.0)       |                       |
| 6 month follow-up CPG intensity  |             | 58.1 (19.5)       |        | 67.4 (21.7)        |     | 65.6 (19.6)       |                       |
| Difference CPG intensity         |             | -8.0 (16.3)       |        | -1.0 (16.0)        |     | 0.2 (14.9)        |                       |
| P (within groups**)              |             | 0.002             |        | 0.67               |     | 0.93              | 0.02                  |
| Effect size (r)                  |             | 0.45              |        | 0.07               |     | 0.01              |                       |
|                                  |             | Median [IQR]      |        | Median [IQR]       |     | Median [IQR]      |                       |
| Baseline CPG disability          | 48          | 60.0 [30.0; 75.8] | 46     | 66.7 [45.0; 80.0]  | 53  | 56.7 [36.7; 80.0] |                       |
| 6 Month follow-up CPG disability |             | 40.0 [20.0; 60.0] |        | 53.3 [29.2; 73.3]  |     | 50.0 [25.0; 80.0] |                       |
| Difference CPG disability        |             | -8.3 [-23.3; 0.0] |        | -3.3 [-16.7; 10.0] |     | -3.3 [-21.7; 5.0] |                       |
| P (within groups**)              |             | 0.003             |        | 0.15               |     | 0.05              | 0.55                  |
| Effect size (r)                  |             | 0.43              |        | 0.20               |     | 0.26              |                       |
| Baseline CPG grade               | 44          | Count (%)         | 44     | Count (%)          | 48  | Count (%)         |                       |
|                                  | I           | 5 (11.4)          |        | 3 (6.8)            |     | 5 (10.4)          |                       |
|                                  | II          | 16 (36.4)         |        | 9 (20.5)           |     | 13 (27.1)         |                       |
|                                  | III         | 7 (15.9)          |        | 10 (22.7)          |     | 13 (27.1)         |                       |
|                                  | VI          | 16 (36.4)         |        | 22 (50.0)          |     | 17 (35.4)         |                       |
| 6 month follow-up CPG grade      |             |                   |        |                    |     |                   |                       |
|                                  | I           | 13 (29.5)         |        | 8 (18.2)           |     | 6 (12.5)          |                       |
|                                  | II          | 13 (29.5)         |        | 15 (34.1)          |     | 17 (35.4)         |                       |
|                                  | III         | 8 (18.2)          |        | 8 (18.2)           |     | 11 (22.9)         |                       |
|                                  | IV          | 10 (22.7)         |        | 13 (29.5)          |     | 14 (29.2)         |                       |
| Difference CPG grade             |             |                   |        |                    |     |                   |                       |
|                                  | ≤-1         | 21 (47.7)         |        | 17 (38.6)          |     | 15 (31.2)         |                       |
|                                  | 0           | 17 (38.6)         |        | 25 (56.8)          |     | 25 (52.1)         |                       |
|                                  | ≥1          | 6 (13.6)          |        | 2 (4.5)            |     | 8 (2.1)           | 0.16                  |
| P (within groups***)             |             | 0.003             |        | 0.001              |     | 0.17              |                       |

\*Number of participants in each group who completed the appropriate part of the CPG at both baseline and follow-up.

\*\* From paired t-test, Wilcoxon signed rank test or marginal homogeneity test as appropriate

\*\*\* From ANOVA on mean difference, Kruskal-Wallis on median difference or chi-squared test on difference in CPG grade as appropriate

**Table 3:** Mean (standard deviation, SD) SF12 Physical Component Score (PCS) and median (interquartile range, IQR) Mental Component Score (MCS) at baseline and 6 month follow-up and difference between the two assessment points for each arm, prescribing, review and treatment as usual (TAU). Within and between arm p-values are also reported.

|                                  | Prescribing |                   | Review |                   | TAU |                   | P (between groups <sup>***</sup> ) |
|----------------------------------|-------------|-------------------|--------|-------------------|-----|-------------------|------------------------------------|
|                                  | n*          | Mean (SD)         | n*     | Mean (SD)         | n*  | Mean (SD)         |                                    |
| Baseline SF12 PCS                | 41          | 33.5 (10.8)       | 43     | 32.59(11.38)      | 45  | 29.60 (9.71)      | 0.75                               |
| 6 month follow-up SF12 PCS       |             | 35.3 (10.8)       |        | 34.62 (11.26)     |     | 32.59 (9.14)      |                                    |
| Difference SF12 PCS              |             | 1.8 (7.5)         |        | 2.02 (7.56)       |     | 2.99 (8.11)       |                                    |
| P (within groups <sup>**</sup> ) |             | 0.12              |        | 0.09              |     | 0.02              |                                    |
| Effect size (r)                  |             | 0.24              |        | 0.26              |     | 0.35              |                                    |
|                                  |             | Median [IQR]      |        | Median (IQR)      | 45  | Median (IQR)      |                                    |
| Baseline SF12 MCS                | 42          | 52.4 [42.0; 58.8] | 43     | 47.9 [38.5; 59.9] |     | 51.5 [41.3; 60.7] | 0.04                               |
| 6 month follow-up SF12 MCS       |             | 49.6 [42.8; 58.1] |        | 47.9 [38.9; 56.2] |     | 44.7 [37.6; 55.8] |                                    |
| Difference SF12 MCS              |             | -0.4 [-3.7; 6.0]  |        | -1.2 [-6.6; 4.2]  |     | -3.0 [-10.0; 1.3] |                                    |
| P (within groups <sup>**</sup> ) |             | 0.64              |        | 0.37              |     | 0.002             |                                    |
| Effect size (r)                  |             | 0.07              |        | 0.14              |     | 0.46              |                                    |
|                                  |             |                   |        |                   |     |                   |                                    |

\* Number of participants in each group who completed the appropriate part of the SF-12 at both baseline and follow-up.

\*\* From paired t-test or Wilcoxon signed rank test as appropriate

\*\*\* From ANOVA on mean difference or Kruskal-Wallis test on median difference as appropriate

**Table 4:** The HADS-Depression (HADS-D) and HADS-Anxiety (HADS-A) count of patients according to severity (normal, mild, moderate or severe) and the difference in severity category between the two assessment points for each arm, prescribing, review and treatment as usual (TAU). Within and between arm p-values are also reported.\*

|                          | n  | Prescribing | n  | Review    | n  | TAU       | P (between groups***) |
|--------------------------|----|-------------|----|-----------|----|-----------|-----------------------|
| Baseline HADS-D          | 44 | Count (%)   | 45 | Count (%) | 53 | Count (%) |                       |
| Normal                   |    | 32 (72.7)   |    | 31 (68.9) |    | 38 (71.7) |                       |
| Mild                     |    | 8 (18.2)    |    | 11 (24.4) |    | 7 (13.2)  |                       |
| Moderate                 |    | 3 (6.8)     |    | 3 (6.7)   |    | 8 (15.1)  |                       |
| Severe                   |    | 1 (2.3)     |    | 0         |    | 0         |                       |
| 6 month follow-up HADS-D |    |             |    |           |    |           |                       |
| Normal                   |    | 32 (72.7)   |    | 32 (71.1) |    | 32 (60.4) |                       |
| Mild                     |    | 7 (15.9)    |    | 6 (13.3)  |    | 10 (18.9) |                       |
| Moderate                 |    | 5 (11.4)    |    | 6 (13.3)  |    | 8 (15.1)  |                       |
| Severe                   |    | 0           |    | 1 (2.2)   |    | 3 (5.7)   |                       |
| Difference HADS-D        |    |             |    |           |    |           |                       |
| ≤-1                      |    | 5 (11.4)    |    | 4 (8.9)   |    | 2 (3.8)   |                       |
| 0                        |    | 34 (77.3)   |    | 37 (82.0) |    | 40 (75.5) |                       |
| ≥1                       |    | 5 (11.4)    |    | 4 (8.9)   |    | 11 (20.8) | 0.32                  |
| P (within groups**)      |    | 1.0         |    | 0.71      |    | 0.03      |                       |
| Baseline HADS-A          | 44 | Count (%)   | 43 | Count (%) | 48 | Count (%) |                       |
| Normal                   |    | 25 (56.8)   |    | 30 (69.8) |    | 29 (60.4) |                       |
| Mild                     |    | 8 (18.2)    |    | 7 (16.3)  |    | 9 (18.8)  |                       |
| Moderate                 |    | 8 (18.2)    |    | 5 (11.6)  |    | 8 (16.7)  |                       |
| Severe                   |    | 3 (6.8)     |    | 1 (2.3)   |    | 2 (4.2)   |                       |
| 6 month follow-up HADS-A |    |             |    |           |    |           |                       |
| Normal                   |    | 27 (61.4)   |    | 29 (67.4) |    | 32 (66.7) |                       |
| Mild                     |    | 7 (15.9)    |    | 6 (14.0)  |    | 5 (10.4)  |                       |
| Moderate                 |    | 8 (18.2)    |    | 6 (14.0)  |    | 10 (20.8) |                       |
| Severe                   |    | 2 (4.5)     |    | 2 (4.7)   |    | 1 (2.1)   |                       |
| Difference HADS-A        |    |             |    |           |    |           |                       |
| ≤-1                      |    | 6 (13.6)    |    | 3 (7.0)   |    | 10 (20.8) |                       |
| 0                        |    | 35 (79.5)   |    | 33 (76.7) |    | 29 (60.4) |                       |
| ≥1                       |    | 3 (6.8)     |    | 7 (16.3)  |    | 9 (18.8)  | 0.14                  |
| P (within groups**)      |    | 0.25        |    | 0.21      |    | 0.55      |                       |

\* Number of participants in each group who completed the appropriate part of the HADS at both baseline and follow-up.

\*\* From marginal homogeneity test

\*\*\* From chi-squared test on difference in HADS

**Table 5:** Median HADS-Depression (HADS-D) and HADS-Anxiety (HADS-A) scores (interquartile range, IQR) at baseline and 6 month follow-up and difference between the two assessment point for each arm, prescribing, review and treatment as usual (TAU). Within and between arm p-values are also reported.

|                          | Prescribing |                  | Review |                 | TAU |                 | P (between groups) |
|--------------------------|-------------|------------------|--------|-----------------|-----|-----------------|--------------------|
|                          | n           | Median [IQR]     | n      | Median [IQR]    | n   | Median [IQR]    |                    |
| Baseline HADS-D          | 42          | 5.0 [3.0; 8.0]   | 44     | 4.5 [2.3; 8.0]  | 51  | 5.0 [3.0; 8.0]  | 0.02               |
| 6 month follow-up HADS-D |             | 4.0 [2.0; 8.0]   |        | 5.0 [2.0; 8.8]  |     | 5.0 [2.0; 10.0] |                    |
| Difference HADS-D        |             | -1.0 [-2.0; 0.0] |        | 0.0 [-1.0; 1.8] |     | 0.0 [-1.0; 2.0] |                    |
| P (within groups)        |             | 0.02             |        | 0.33            |     | 0.22            |                    |
| Baseline HADS-A          | 44          | 7.0 [3.3; 10.8]  | 43     | 5.0 [3.0; 10.0] | 48  | 6.0 [4.0; 10.0] | 0.05               |
| 6 month follow-up HADS-A |             | 5.0 [2.3; 9.8]   |        | 6.0 [3.0; 9.0]  |     | 7.0 [4.0; 10.0] |                    |
| Difference HADS-A        |             | -1.0 [-2.0; 0.0] |        | 0.0 [-2.0; 2.0] |     | 0.5 [-3.0; 2.0] |                    |
| P (within groups)        |             | 0.01             |        | 0.45            |     | 0.81            |                    |

\* Number of participants in each group who completed the appropriate part of the HADS at both baseline and follow-up.

Box 1 Examples of pharmacist interventions in the prescribing arm

**Changes to pain management:** 'use paracetamol regularly', 'take tramadol if needed' 'add piroxicam gel PRN', 'given web links to self help groups'

**Compliance aid:** ' gave written times that this drug could be taken'

**Addressing side effects/safety:** 'take paracetamol after initial NSAID', 'take senna', 'ordered blood monitoring', 'stop use of two NSAIDS'

**General health:** 'discussed weight loss', 'invited to practice nurse for BP', 'glucose, lipids and lifestyle update',

**Cost minimisation:** 'change aspirin EC to plain',

1  
2 BOX 2 Examples of quotes from Pharmacists (n=6), GPs (n=23) and patient participants (n=40)  
3 on the prescribing intervention  
4

5  
6 **Pharmacists (from interviews):**

7  
8 **Satisfying** (n=6): 'contact with patients', 'being able to help patients', 'being able to make a  
9 difference to long-standing pain'...'even in small ways'

10  
11 **Interesting** (n=6): 'learning about pain'

12  
13 **Challenging** (n=6): 'complex, chronically ill patients'

14  
15 **GPs (from interviews):**

16  
17 **Support for the service** (n=17): 'it's been a very positive thing'

18  
19 **Agreement with pharmacists' recommendations** (n=23): 'oh very reasonable suggestions',  
20 'tinkering round the edges', 'had been tried already'.  
21

22  
23 **Trust in the practice pharmacist** (n=23): 'I respect his professional judgement'

24  
25 **Cost effectiveness** (n=6): 'if there's limited resources do we want to spend the money on a  
26 pharmacist'.  
27

28  
29 **Patients (from 3 month questionnaire):**

30  
31 **Closed questions:**

32  
33 Proportion agreeing that:

34 The pharmacist was interested in them (89%; 39/44)

35 They were totally satisfied (85%; 39/46)

36 They were told about their treatment (82%; 38/46)

37 Their consultation was thorough (79%; 34/44)

38 They would have liked more time (9%; 4/44)

39 They would have preferred to see their GP (9%; 4/44)

40 Too many people were now involved in their treatment (11%; 5/44).  
41

42  
43 **Open text questions:**

44  
45 Positive (n=39): 'She was professional, relaxed, pleasant and interested. Excellent!'  
46

47  
48 Negative (n=1): 'A waste of time, altered my tablets which made my pain worse'.  
49  
50  
51  
52  
53  
54  
55  
56  
57  
58  
59  
60



## Title page

Pharmacist-led management of chronic pain in primary care: results from a randomised controlled exploratory trial

Hanne Bruhn, Christine M Bond, Alison M Elliott, Philip C Hannaford, Amanda J Lee, Paul McNamee, Blair H Smith, Margaret C Watson, Annie Blyth, Richard Holland, David Wright

Centre for Healthcare Randomised Trials, Health Services Research Unit, University of Aberdeen, 3<sup>rd</sup> floor Health Sciences Building, Foresterhill, Aberdeen, AB25 2ZD, UK Hanne Bruhn, Trial Manager

Centre of Academic Primary Care, Division of Applied Health Sciences, University of Aberdeen, Polwarth West Block, Foresterhill, Aberdeen, AB25 2ZD, UK, Christine M Bond, Professor of Primary Care: Pharmacy

Centre of Academic Primary Care, Division of Applied Health Sciences, University of Aberdeen, Polwarth West Block, Foresterhill, Aberdeen, AB25 2ZD, UK, Alison M Elliott, Senior Research Fellow

Centre of Academic Primary Care, Division of Applied Health Sciences, University of Aberdeen, Polwarth West Block, Foresterhill, Aberdeen, AB25 2ZD, UK, Philip C Hannaford, NHS Grampian Chair of Primary Care

~~Medical Statistics Team, Division of Applied Health Sciences~~~~Population Health, 1st floor,~~  
Polwarth Building, Foresterhill, Aberdeen, AB25 2ZD, UK, Amanda J Lee, Professor of Medical Statistics

Health Economics Research Unit, University of Aberdeen, Polwarth Building, Foresterhill, Aberdeen, AB25 2ZD, UK, Paul McNamee, Reader

~~Mackenzie Building, Kirsty Semple Way~~[Division of Population Health Sciences, University of Dundee](#), Ninewells Hospital and Medical School, Dundee, DD2 4RB, UK, Blair H Smith, Professor of Population Science

Centre of Academic Primary Care, Division of Applied Health Sciences, University of Aberdeen, Polwarth West Block, Foresterhill, Aberdeen, AB25 2ZD, UK, Margaret C Watson, Senior Research Fellow

Norwich Medical School, Faculty of Medicine and Health Sciences, University of East Anglia, Norwich Research Park, Norwich, NR4 7TJ, UK, Annie Blyth, Research Associate

Norwich Medical School, Faculty of Medicine and Health Sciences, University of East Anglia, Norwich Research Park, Norwich, NR4 7TJ, UK, Richard Holland, Professor of Public Health Medicine

School of Pharmacy, University of East Anglia, Norwich Research Park, NR4 7TJ, UK, David Wright, Chair in Pharmacy Practice

1  
2  
3  
4  
5 Correspondence to: Professor CM Bond c.m.bond@abdn.ac.uk, Centre of Academic Primary  
6 Care, Division of Applied Health Sciences, University of Aberdeen, Polwarth West Block,  
7 Foresterhill, Aberdeen, AB25 2ZD, UK  
8

9  
10 The Corresponding Author has the right to grant on behalf of all authors and does grant on behalf of all  
11 authors, [a worldwide licence](#) to the Publishers and its licensees in perpetuity, in all forms, formats and  
12 media (whether known now or created in the future), to i) publish, reproduce, distribute, display and  
13 store the Contribution, ii) translate the Contribution into other languages, create adaptations, reprints,  
14 include within collections and create summaries, extracts and/or, abstracts of the Contribution, iii)  
15 create any other derivative work(s) based on the Contribution, iv) to exploit all subsidiary rights in the  
16 Contribution, v) the inclusion of electronic links from the Contribution to third party material where-  
17 ever it may be located; and, vi) licence any third party to do any or all of the above.  
18  
19  
20  
21  
22  
23  
24  
25  
26  
27  
28  
29  
30  
31  
32  
33  
34  
35  
36  
37  
38  
39  
40  
41  
42  
43  
44  
45  
46  
47  
48  
49  
50  
51  
52  
53  
54  
55  
56  
57  
58  
59  
60

## Abstract

### Objectives

To compare the effectiveness of pharmacist medication-review, with or without [pharmacist](#) prescribing, with standard care, for patients with chronic pain.

### Design

An exploratory randomised controlled trial.

### Setting

Six general practices with prescribing pharmacists in Grampian (3) and East Anglia (3).

### Participants

Patients on repeat prescribed pain medication(4815) were screened by GPs, and mailed invitations (1397). 196 were randomised and 180 (92%) completed. Exclusion criteria included: severe mental illness, terminally ill, cancer related pain, history of addiction

### Randomisation and intervention

Patients were randomised using a remote telephone service to: (i) pharmacist medication-review with face-to-face pharmacist prescribing; or (ii) pharmacist medication-review with feedback to GP and no planned patient contact; or (iii) treatment as usual (TAU). Blinding was not possible.

### Outcome measures

Primary Outcomes were the [SF-12v2](#), the Chronic Pain Grade (CPG), the [HUI3](#) and the [SF-12v2, together with](#) Hospital Anxiety and Depression Scale (HADS). Outcomes were collected at 0,3,and 6 months.

Ethical approval was obtained.

### Results

In the prescribing arm (n=70) two patients were excluded/nine withdrew. In the review arm (n=63) one was excluded/three withdrew. In the TAU arm (n=63) four withdrew. Compared with baseline, patients had an improved CPG in the prescribing arm, 47.7% (21/44; p=0.003),

Formatted: Highlight

Formatted: Highlight

1  
2  
3  
4  
5 and in the review arm, 38.6% (17/44; p=0.001), but not the TAU group, 31.3% (15/48; ns). The  
6 SF-12 PCS showed no effect in the prescribing or review arms but improvement in TAU  
7 (p=0.02). The SF-12 MCS showed no effect for the prescribing or review arms and deterioration  
8 in the TAU arm (p=0.002). HADS scores improved within the prescribing arm for Depression  
9 (p=0.022) and Anxiety (p=0.007), between groups (p=0.022 and p=0.045 respectively).

10  
11  
12  
13  
14 -Conclusion

15 This is the first RCT of pharmacist-prescribing in the UK, and suggests a there may be a benefit  
16 for patients with chronic pain. A larger trial is required.

17  
18  
19  
20  
21  
22  
23  
24  
25  
26  
27  
28  
29  
30  
31  
32  
33  
34  
35  
36  
37  
38  
39  
40  
41  
42  
43  
44  
45  
46  
47  
48  
49  
50  
51  
52  
53  
54  
55  
56  
57  
58  
59  
60  
Trial registration: [www.isrctn.org/ISRCTN06131530](http://www.isrctn.org/ISRCTN06131530). Medical Research Council funding.

*Focus:*

- Chronic pain, (lasting >3 months) affects up to half the adult population, most of whom are primarily managed in primary care but prescribing is often sub-optimal.
- Pharmacists now have prescribing rights but no published research has compared the effectiveness of their prescribing with that of GPs.
- The theoryhypothesis hypothesis was that pharmacist advice (with or without pharmacist prescribing) would lead to better outcomes than usual care

*Key messages:*

- The findings suggest there may be improved pain related outcomes for patients receiving pain related care from a pharmacist prescriber
- A larger trial is called for.

*Strengths and Limitations*

- This the first randomised controlled trial of pharmacist prescribing in the UK looking at patient reported clinical outcomes
- The study was designed as an exploratory trial so no power calculation was done

## Introduction

Chronic pain (pain lasting more than three months) affects up to half the adult United Kingdom (UK) population, and is considered severely limiting in about 15% of cases (1). Recovery is uncommon with nearly 80% of those identified with chronic pain at baseline still reporting chronic pain four years later (2). It adversely affects many aspects of a person's physical and psychological health, and social and economic well being (3-6).

In the UK, most patients with chronic pain present, and are managed, in primary care (7).

Although non-pharmacological treatments are available, these are accessed by few patients, with mixed success (e.g. (8-10)). Analgesics prescribed in primary care remain the mainstay of treatment (4), representing substantial workload and cost. Sub-optimal prescribing may lead to poor pain control and other adverse patient outcomes. One study found that the most common medications involved in adverse drug reaction-related emergency admissions involved non-steroidal anti-inflammatory drugs (NSAIDs) (11) [which are commonly used to manage pain](#). Improved prescribing could result in better outcomes and remove the need for more costly, scarce, alternatives.

Pharmacists working in UK general practices are well-placed to improve pain pharmacotherapy because of their expertise in therapeutics, understanding of the poly-pharmacy regimens (12) frequently used in chronic pain management, and established relationships with other primary care colleagues. In the UK National Health Service (NHS), recent regulatory changes now allow accredited pharmacists (as well as some other health care professionals such as nurses) to prescribe prescription-only medicines (POMs) (13). [Pharmacists can either be qualified as supplementary prescribers, in which case they operate within an agree-d clinical management plan \(CMP\) in partnership with the doctor and patient, or as an independent prescriber, in which case they can either prescribe completely independently or within a CMP.-](#)

However, despite the increasing number of non-medical prescribers, including pharmacists, there has been no rigorous comparisons of the outcomes of non-medical versus GP prescribing. This information is needed to assess the clinical effectiveness of different care models.

This paper reports findings from an exploratory randomised controlled trial (RCT) comparing pharmacist medication review, with or without pharmacist prescribing, with standard care for

1  
2  
3  
4  
5 patients with chronic pain. Development of the trial was informed by earlier feasibility work  
6 (14,15).  
7

8  
9 The *a priori theory hypothesis* hypothesis was that, in patients with chronic pain, pharmacist  
10 advice (with or without pharmacist prescribing) would lead to better patient functioning and/or  
11 better pain control at six months than treatment as usual (TAU). ~~The hypothesis was developed  
12 prior to data collection.~~  
13  
14  
15

Formatted: Font: Italic

Formatted: Highlight

## 16 17 18 19 **Methods**

### 20 *Regulatory Issues*

21 Ethical approval was granted by the National Research Ethics Service Committee – North of  
22 Scotland (reference number 09/S0801/107). NHS Research and Development approval was  
23 granted by NHS Grampian and East Norfolk & Waveney Research Governance Committees.  
24  
25 Patients gave informed consent before taking part.  
26  
27

### 28 29 *Design*

30 An open, exploratory RCT in which patients were randomised to one of three study arms.  
31  
32 Participants were not blind to allocated treatment arm due to the nature of the intervention.  
33

### 34 35 *Recruitment of practices and independent prescribing pharmacists*

36 Practices in [the Grampian Health Board area](#), Scotland (n=18) and East Anglia [region of](#),  
37  
38 England (n=4) known to have an attached Royal Pharmaceutical Society of Great Britain  
39 registered independent pharmacist prescriber, were eligible to take part. From those indicating  
40 a willingness to participate, convenience sampling was used to identify six general practices:  
41  
42 three in Grampian and three in East Anglia.  
43

### 44 45 *Patient inclusion and exclusion criteria*

46 Patients registered with the recruited practices were eligible for inclusion if they were over 18  
47 years of age, living in their own home, and receiving regular prescribed medication for pain.  
48

49 Patients were identified by a computerised search [\(14\) \(5 McDermott, M. E. 2006\)](#) of the drug  
50 records of all individuals registered with the practice, to identify those who had received either  
51  
52 two or more acute prescriptions, and/or one repeat prescription within the last 120 days, for  
53  
54 an analgesic (British National Formulary (BNF section 4.7) and/or non-steroidal anti-  
55

1  
2  
3  
4  
5  
6 inflammatory medication (NSAID) (BNF section 10.1.1). Medications which can be used for  
7 analgesia but whose primary indication is not chronic pain (e.g. triptans, anti-epileptics or anti-  
8 depressants) were excluded as these drugs identify few additional eligible patients (16). In  
9 accordance with trial criteria, GPs excluded and recorded reasons for patients who had: a  
10 concomitant severe mental health problem or terminal illness; had suffered recent  
11 bereavement; had a known alcohol or drug addiction; suffered pain caused by cancer or other  
12 malignancy; were unable to give informed consent; other (unspecified) reasons.  
13  
14  
15

#### 16 *Patient recruitment*

17  
18 Eligible patients were sent an invitation pack (letter, information sheet, consent form) by  
19 practice staff between March and June 2010. Consent forms were returned directly to the  
20 researchers, who sent out a baseline questionnaire. Patients returning completed  
21 questionnaires were randomised by the researcher using a telephone randomisation service  
22 with a random number allocation which ensured allocation concealment. The allocation  
23 sequence was 1:1:1.  
24  
25  
26  
27

#### 28 *Intervention*

29  
30 All participating pharmacists took part in a two-day course updating them about pain  
31 management. As part of the training, participants defined and agreed the treatment algorithm  
32 they would all use.  
33  
34

35 'Prescribing' arm: Pharmacists invited patients to a face-to-face consultation. Prior to the  
36 consultation, pharmacists completed a paper-based medication review of each patient's  
37 medical record and patients were asked to complete a pain diary to inform the consultation. A  
38 pharmaceutical care plan was agreed between the pharmacist and the patient. The plan  
39 assessed and documented relevant past medical history and current conditions; known  
40 allergies and adverse drug reactions; relevant laboratory results; pain-related medications  
41 prescribed in the previous 10 years; current pain related prescription medications; current  
42 symptoms; lifestyle issues, including units of alcohol consumed per week; recommendations  
43 for changes to medication (if any); whether non-pharmaceutical treatments had been  
44 considered; and, any other relevant issues. [Copies of the pain diary and pharmaceutical care  
45 plan are available -from the authors on request.](#) At the end of the consultation any required  
46 prescriptions for medicines were issued by the pharmacist. Due to Controlled Drug (CD)  
47 regulations in place at the time, prescribing for CDs was done using a supplementary  
48  
49  
50  
51  
52  
53  
54  
55  
56  
57  
58  
59  
60

prescribing Clinical Management Plan (17), rather than independent prescribing. Patients were followed up either by phone or face-to-face, at each pharmacist’s discretion.

‘Review arm’: The pharmacists conducted a paper-based medication review focussed on pain-related prescription medications, before creating a pharmaceutical care plan which detailed any recommendations for medication changes. The plan was passed to the patient’s GP for implementation. The GPs were asked subsequently about actions taken as a result of the recommendations.

Treatment as usual (TAU): Patients received standard general practice care.

**Outcome measures**

A core aim of this exploratory randomised controlled trial (RCT) was to finalise the selection of outcome measures for a subsequent multi-centred RCT. In the Current Controlled Trials Registration (ISRCTN06131530) we specified both primary and secondary outcome measures (primary: SF12, HUI ; secondary: CPG, HADS) based on our judgement following the earlier feasibility study (15). However in practice, all outcomes were considered equal and no single measure was defined as the primary outcome, for example, for the purpose of a sample size calculation (see below). These four outcome measures are described below.

There were two primary outcome measures: the Chronic Pain-Grade (CPG) and the Medical Outcomes Study 12-item short form version 2 (SF-12v2). Use-Inclusion of both a pain specific and generic outcome measures was based on Initiative on Methods, Measurement, and Pain Assessment in Clinical Trials (IMMPACT) recommendations (18) and an earlier (18,19) feasibility study (15).

The SF-12v2 is a generic health and functioning scale (19), previously used in population-based studies of pain (20,21). A Physical (PCS) and Mental Component Score (MCS) was calculated, ranging from 0 to 100; a higher score indicates better functioning.

The Health Utilities Index (HUI3) is a preference-based system for measuring comprehensive health status and health-related quality of life (HRQL) (22). It provides descriptive evidence and a score for each dimension of health (vision, hearing, speech, ambulation/mobility, pain, dexterity, self-care, emotion and cognition) and a HRQL score for overall health. Each dimension has 3- 6 levels. Owing to the cost of the additional license fee to score data from this measure, this instrument was not subsequently analysed.

Formatted: Highlight

Formatted: Space Before: 0 pt, After: 10 pt, Line spacing: Multiple 1.15 li

Formatted: Highlight

Formatted: Space After: 10 pt, Line spacing: Multiple 1.15 li

Formatted: Highlight



1  
2  
3  
4  
5  
6 The CPG (192230) is a seven item scale which assesses pain severity on two dimensions:  
7 disability and intensity. The scale classifies pain according to level of intensity and disability (I  
8 (low disability-low intensity) to IV (high disability-severely limiting)).  
9

10  
11 ~~The SF-12v2 is a generic health and functioning scale (2021), previously used in population-~~  
12 ~~based studies of pain (21, 222,23). A Physical (PCS) and Mental Component Score (MCS) was~~  
13 ~~calculated, ranging from 0 to 100; a higher score indicates better functioning.~~  
14  
15

16  
17  
18 ~~A secondary outcome measure was~~The the ({}))Hospital Anxiety and Depression Scale (HADS)  
19 ~~(2324(24)), is~~ a 14-item screening instrument which identifies the possible and probable  
20 caseness of anxiety (7 items (HADS-A)) and depression (7 items (HADS-D)); each item scored  
21 from 0 (not present) to 3 (highly present). Standard thresholds and previously used labels  
22 (~~2545~~) were applied (no depression/anxiety (0-7), mild (8-10), moderate (11-15) or severe  
23 (>15)).  
24  
25  
26  
27

#### 28 *Data collection*

##### 29 *Participant questionnaires*

30  
31 Questionnaires were posted to participants at baseline (pre-randomisation), and 3 and 6  
32 months post-randomisation (follow-up was conducted between July 2010 and January 2011).  
33 Up to two reminders were sent. Questionnaire content included the outcome measures  
34 described above together with items on: demographic status (baseline only); screening items  
35 to confirm eligibility (baseline only); duration of pain condition (baseline only); location of pain;  
36 Morisky Medication Adherence Scale 4 (MMAS-4) (2566); participant satisfaction (11  
37 statements derived from the feasibility study for the prescribing arm (3 months only) and  
38 additional comments by participants. The MMAS-4 provides a score of self-reported adherence  
39 to medication regimen. Scores range from 0 (low adherence) to 4 (high adherence).  
40  
41  
42  
43  
44  
45

##### 46 *Follow-up interviews with staff*

47 Post-intervention, all pharmacists and all GPs in participating practices were invited to take part  
48 in semi-structured interviews, carried out face-to-face when possible, otherwise by telephone.  
49 Interviews were taped, transcribed verbatim and content analysis was carried out.  
50  
51  
52

##### 53 *Sample size*

54  
55  
56  
57  
58  
59  
60

As this was an exploratory trial to estimate the effect size for a larger trial, no formal sample size calculation was possible (27267). We aimed to recruit 30 participants per practice (n=180) (excluding those recruited for training purposes with an additional six per practice for training purposes) i.e. 180-216 in total. This was deemed sufficient to give reliable effect size estimates for the primary outcome measures of health status or chronic pain grade, or health status.

Formatted: Highlight

Formatted: Highlight

#### Data management and analysis

Data were entered into identical SPSS databases at each site and accuracy checks carried out on 10% before databases were merged. Descriptive statistics included means and standard deviations (SD) for normally distributed continuous data, medians (interquartile range (IQR)) for skewed continuous data and percentages (n) for categorical data. Analysis was conducted on an intention-to-treat basis for participants with complete data on relevant measures using SPSS version 18.

Exploratory analyses for parametric data included the paired t-test for within-arm comparisons of mean difference between baseline and 6 months and one-way ANOVA for between arm comparisons of mean difference. For non-parametric data it included the Wilcoxon Signed Rank test for within-arm comparisons of median difference and the Kruskal Wallis test for between arm comparisons of median difference. Categorical data was analysed using the marginal homogeneity test for within-arm comparisons of (with null hypothesis that the distribution of CPG grade or HADS group does not change between baseline and 6 month follow-up) and the Chi-squared test for between arm comparisons; analyses reported here are based on 6 month follow-up data (other than for participant experiences). Within arm effect sizes, expressed in terms of a Pearson correlation coefficient (r) have been calculated using the formulas from Rosenthal (1991) (287). Effect sizes can be directly compared using Cohen's (1988) (298) criteria of r=0.1 (small effect); r=0.3 (medium effect) and r=0.5 (large effect).

Formatted: Not Highlight

Formatted: Not Highlight

## Results

### Response rates and demography

Six of the seven practices approached participated. GPs excluded 12% (392/3281) of patients, mostly those with dementia. There was no statistically significant difference between participants and non-participants in terms of age, gender, and index of multiple deprivation.

1  
2  
3  
4  
5  
6 Figure 1 shows the flow of participants through the study. Overall, the consent rate was 25%  
7 (356/1397) and the recruitment rate was 14% (196/1397).  
8

9 [INSERT FIGURE 1 HERE]  
10

11 Eighty six percent of participants (251/289) returned baseline questionnaires, of whom 232  
12 were randomised (36 participants were randomised to one of the two intervention arms for  
13 training purposes and were not included in any further analysis and 19 were not included as  
14 recruitment target had been met). The overall follow-up rate at 3 months was 86%  
15 (161/187) and at 6 months 84% (152/180).  
16  
17

18 As shown in Table 1, groups were similar at baseline for demographic and socioeconomic  
19 variables and pain data. Most participants were married, Caucasian and female, older (mean  
20 (SD) age 65 (12.6) years), had an annual income of <£25,000 and had suffered from pain for at  
21 least five years. Most (57%;103/181) reported being fully adherent to their medication  
22 regimen (MMAS-4, median 4.0 (IQR 3.0- 4.0)) (15 missing MMAS scores).  
23  
24  
25  
26  
27

28 [INSERT TABLE 1 HERE]  
29

30 In the prescribing arm, 78% (53/68) attended an initial prescribing consultation, 31 had at least  
31 one planned follow-up (of which 34/37 were generally conducted by phone) and 130  
32 recommendations were made for 92% (49/53) of participants seen. Examples are shown in Box  
33 1. The median time taken for the note-based record review was 35 minutes (IQR 20.0, 45.0),  
34 the consultation was 30 minutes (IQR 20.0, 40.0), careplan preparation 10 minutes (IQR 10.0,  
35 20.0) and median duration of follow-ups was 10 minutes (IQR 5.0- 15.0).  
36  
37  
38  
39

40 [INSERT BOX 1 HERE]  
41

42 In the review arm 97% (60/62) of participants' records were reviewed (note there was one post  
43 randomisation exclusion) for whom 197 recommendations were made. Where GP feedback  
44 was provided (n=48), they generally agreed with pharmacists' recommendations, which were  
45 fully implemented for 20 participants (two by the pharmacist following request by GP), partially  
46 for 19 participants and not at all for nine participants. The median time taken for the note-  
47 based record review was 30 minutes (IQR 24.3, 45.0), and careplan preparation was 10  
48 minutes (IQR 5.0, 20.0).  
49  
50  
51  
52  
53  
54  
55  
56  
57  
58  
59  
60

### *Clinical outcome measures*

Table 2 shows the mean (SD) or median (IQR) of the CPG for each arm at baseline and 6 month follow-up. Table 3 shows the SF-12 scores and Table 4 shows the HADS-A and HADS-D results.

[INSERT TABLE 2,3,4, HERE]

In the prescribing arm, there was a statistically significant within arm improvement for the CPG intensity ( $p=0.002$ , [effect size \(r\)=0.45](#)) and disability ( $p=0.003$ , [effect size \(r\)=0.43](#)) subscales, and between arms on the intensity sub-scale ( $p=0.02$ ), but not the disability subscale ( $p=0.55$ ) (Table 2). There was a significant within-arm improvement in overall CPG grade in the prescribing ( $p=0.003$ ) and review arm ( $p=0.001$ ), but not in the TAU arm. The SF-12 Physical Component Score showed a statistically significant within arm improvement in the TAU arm ( $p=0.02$ , [effect size \(r\)=0.35](#)) (Table 3), but not between trial arms. The SF-12 Mental Component Score showed a statistically significant deterioration in the TAU arm ( $p=0.002$ , [effect size \(r\)=0.45](#)) (Table 3), as did the HADS-D ( $p=0.03$ , Table 4). Analysis was also carried out on the non-categorised HADS scores which showed a statistically significant improvement within the prescribing arm for Depression ( $p=0.022$ ) and Anxiety ( $p=0.007$ ). These were both significant between groups ( $p=0.022$  and  $p=0.045$  respectively) (Table 5).

### *Acceptability of the pharmacist prescribing intervention*

All six pharmacists and 56% of the GPs (23/41) were interviewed. All pharmacists and most GPs were positive about the intervention, although some GPs suggested that the pharmacists' recommendations had been minor and questioned the cost-effectiveness of the service. Patient participants were generally positive about the pharmacist prescribing service although some concerns were identified, as illustrated by the quotes shown in Box 2.

[INSERT BOX 2 HERE]

## **Discussion**

### *Principal findings*

This exploratory RCT of pharmacist-led management of patients with chronic pain suggests that pharmacist prescribing (and possibly pharmacist review alone) may be effective in improving pain-related outcomes and be acceptable to both patients and [most](#) professionals. There was an indication of a positive effect on emotional health, but no measurable effect on general health.

### Strengths and weaknesses

This was the first RCT to assess clinical and humanistic outcomes after pharmacist prescribing for any clinical condition compared to usual GP care, and the first RCT to specifically assess pharmacist-led management of chronic pain, compared with usual GP care. It was based on extensive development and feasibility work (14,15) in line with MRC framework for development and evaluation of complex interventions (28,29,30). A range of validated outcome measures was included, as well as a parallel qualitative process evaluation which ~~demonstrated~~ assessed satisfaction and acceptability. The inclusion of six practices and their associated pharmacists from both Scotland and England increased the generalisability of the findings. Pharmacists received formal training and agreed and used a common treatment algorithm which should have increased standardisation of treatment. The preponderance of females (overall 62%) and average age of 65 years reflects the wider chronic pain population (1) as does the distribution of pain site (31,320, 31,29,30)

There were, however limitations. Although high follow-up response rates were achieved at both three (86%) and six months (85%) only 25% of eligible patients entered the trial. This low initial consent rate is in line with other studies (33,342, 3329,30), but may cause unknown biases including problems of generalisability, as does the solely Caucasian- ethnicity. Concerns identified by participants during the formal feedback e.g. having too many people involved in one's care may have contributed to poor response rates and rewording of participant recruitment documentation to reassure participants of the role of the pharmacist could address this. some of the concerns identified by participant feedback e.g. having too many people involved in one's care. More participants withdrew in the prescribing arm compared with the other two arms, which might be attributed to the need for an additional practice visit.

The study was an exploratory trial so no formal power calculation was undertaken. **However, because there were no published MID<sub>s</sub> available to estimate effect size for the outcomes in this population, it was important to present the actual clinical magnitude of change in outcome at 6 months alongside a statistical assessment of this change (p-value). This allows an assessment of both clinical and statistical significance simultaneously with the caveat that this is an exploratory study. With around 50 patients per arm, this was deemed sufficient numbers to examine the change in outcome measures with appropriate within and between group univariate statistical tests. because of no prior knowledge of effect size.** Due to the nature of the intervention, no participants were blind to their group allocation, and so some

Formatted: Font: Bold

Formatted: Font: 12 pt, Bold

Formatted: Font: Bold

1  
2  
3  
4  
5 outcomes, especially the qualitative components, may have been affected by social desirability  
6 bias.  
7  
8

9  
10 Our **main** outcome measures were self-reported, but this is the norm in pain studies as pain is  
11 a subjective experience (18). Furthermore we do not know how important the observed  
12 differences were to participants. Following precedents set in previous research (25), and  
13 because there is no consensus on an alternative measure (35434) we used the HADS as a tool  
14 to classify people by severity of depression and anxiety. However it is strictly a screening tool,  
15 and the four levels of severity have not been formally validated. We therefore also compared  
16 outcomes using it as a continuous scale.  
17  
18  
19  
20

### 21 *Relationship with other studies*

22  
23 This study is important because no other RCT has evaluated pharmacist prescribing and few  
24 studies, and importantly no RCTs, have evaluated pharmacist interventions for pain. In  
25 pharmacist prescribing most research has focussed on reported experiences of professionals  
26 and patients, and not used validated outcome measures. Yet pharmacist prescribing is now  
27 widely practised. For pain, there have been a few small studies. Briggs et al (2008) (3652)  
28 conducted a small before-and-after evaluation (involving 65 patients) of a nurse and  
29 pharmacist-led chronic pain clinic in primary care. Pain intensity Visual Analogue Scale scores  
30 reduced significantly over six months. Another evaluation of 26 patients using a medication  
31 review service provided jointly by a physiotherapist and pharmacist in the UK, reported  
32 improvement in pain control for 88% of patients (3763).  
33  
34  
35  
36  
37  
38

39 The CPG was found to show a graded effect across the three arms, showing discrimination with  
40 both direction and strength of improvement, suggesting maximum benefit for those in the  
41 pharmacist prescribing arm. However, the reduction in overall score appears to be mediated by  
42 a change in the intensity of pain subscale rather than in pain-related disability. The effect size  
43 of 0.45 suggests this could be an important difference. In contrast, the SF-12, a measure of  
44 general health and functionality showed no significant difference between intervention arms,  
45 reflecting either no effect or or lack of power to detect an effect.  
46  
47  
48  
49

50 Whilst most participants in this study were already within the normal range on the HADS scale,  
51 and therefore had minimal chance of improvement, there were nonetheless suggestions of  
52 better outcomes in participants in the prescribing arm. Including a range of instruments is in  
53  
54  
55  
56

line with IMMPACT recommendations (3874), which state that focus should be on the whole person, not just about pain. However, this needs to be balanced with minimising participant burden.

#### *Explanations, implications, and future research*

The number of pharmacists' recommendations per participant was higher in the review arm than in the prescribing arm. This might seem contradictory to the possible greater benefit found in the prescribing arm. However, in the prescribing arm pharmacists met the participant and may have more readily identified and dismissed suggestions previously -tried. The interview feedback highlighted that some recommendations for change, whilst sensible, had been tried already. This might also be the reason why there were only 60% of pharmacist recommendations with which the GP fully agreed. Self-reported adherence to medication at baseline was good. Despite this, the pharmacists still improved pain outcomes in the prescribing arm. This could have been due to changes in medications and/or participant education about optimal timing for administration of analgesic medicines. Further research is needed to confirm the beneficial effect of pharmacist prescribing and its sustainability.

#### **Conclusion**

Our results suggest that pharmacist prescribing -(and possibly pharmacist review alone) -for patients with chronic pain is feasible, acceptable and may lead to improvements...acceptable and leads to improvements in pain and other measures. A larger fully-powered trial is now needed to confirm these findings.

**Formatted:** Font: (Default) +Body (Calibri), 12 pt, Not Bold, Not Italic

#### **Data sharing statement**

Consent was not obtained from participants for data sharing; the presented data are anonymised and there is no risk of individual -identification. Requests for data- should be made to the contact author who will provide this in a format in which risk of patient identification will be minimal.

#### **Conflict of interest statement**

All authors have completed the Unified Competing Interest form at [www.icmje.org/coi\\_disclosure.pdf](http://www.icmje.org/coi_disclosure.pdf) (available on request from the corresponding author) and declare: no support from any organisation for the submitted work; no financial relationships with any organisations that might have an interest in the submitted work in the previous 3

**Formatted:** Font: 12 pt

years; no other relationships or activities that could appear to have influenced the submitted work.

#### Authors' contributions

Formatted: Font: 12 pt, Not Bold

HB and CB drafted the manuscript.

Formatted: Font: 12 pt

All authors:

- 1) made substantial contributions to conception and design, or acquisition of data, or analysis and interpretation of data;
- 2) were involved in drafting the manuscript or revising it critically for important intellectual content; and
- 3) have given final approval of the version to be published.

#### Acknowledgements

We thank the participating patients, practices and pharmacists. We would also like to thank Kirsten Harrild (Medical Statistics, UOA) for statistical support. Rick Adams (School of Pharmacy, UEA) helped design and deliver the pharmacist training and Lesley Thomson (NHS Grampian) helped design the pharmacist data collection forms. The patient postal questionnaire was based on work by Nicola Cooper and the Norfolk Arthritis Register (NOAR) research team. The Pharmacy-Led Management of Chronic Pain Study Team acknowledges the financial support of NHS Research Scotland (NRS), through Scottish Primary Care Research Network Northeast. The work was conducted as part of the Aberdeen Pain Research Collaboration. The project was funded by the Medical Research Council. They had no further involvement in any aspect of study conduct; all researchers were independent of the funding body.

All authors had access to all of the study data and can take responsibility for the integrity of the data and the accuracy of the data analysis.

#### References

- (1) Elliott AM, Smith BH, Penny KI, Smith WC, Chambers WA. The epidemiology of chronic pain in the community. *Lancet* 1999;354:1248-1252.
- (2) Elliott AM, Smith BH, Hannaford P, Smith WC, Chambers WA. The course of chronic pain in the community: results of a 4-year follow-up study. *Pain* 2002;99:299-307.



- 1  
2  
3  
4  
5  
6 (3) Becker N, Bondegaard Thomsen A, Olsen AK, Sjøgren P, Bech P, Eriksen J. Pain epidemiology  
7 and health related quality of life in chronic non-malignant pain center patients referred to  
8 a Danish multidisciplinary. *Pain* 1997;73:393-400.
- 9  
10 (4) Breivik H, Collett B, Ventafridda V, Cohen R, Gallacher D. Survey of chronic pain in Europe:  
11 prevalence, impact on daily life, and treatment. *Eur J Pain* 2006;10:287-333.
- 12  
13 (5) Gureje O, Von Korff M, Simon GE, Gater R. Persistent pain and well-being: a World Health  
14 Organization Study in Primary Care. *JAMA* 1998;280:147-151.
- 15  
16 (6) Magni G, Marchetti M, Moreschi C, Merskey H, Luchini SR. Chronic musculoskeletal pain and  
17 depressive symptoms in the National Health and Nutrition Examination. I. Epidemiologic  
18 follow-up study. *Pain* 1993;53:163-168.
- 19  
20 (7) Sullivan MD, Turner JA, Romano J. Chronic pain in primary care: identification and  
21 management of psychological factors. *J Fam Pract* 1991;32:193-199.
- 22  
23 (8) Green S, Buchbinder R, Hetrick SE. Physiotherapy interventions for shoulder pain. *Cochrane*  
24 *Database of Syst Rev* 2010(9):Art. No.: CD004258. DOI: 10.1002/14651858.CD004258.
- 25  
26 (9) Eccleston C, Williams, A. C. D. C., Morley S. Psychological therapies for the management of  
27 chronic pain (excluding headache)  
28 in adults. *Cochrane Database Syst Rev* 2009 Apr 15;(2):CD007407. DOI:  
29 10.1002/14651858.CD007407.pub2.
- 30  
31 (10) Haetzman M, Elliott AM, Smith BH, Hannaford P, Chambers WA. Chronic pain and the use  
32 of conventional and alternative therapy. *Family Practice* 2003;20(2):147-154.
- 33  
34 (11) Pirmohamed M, James S, Meakin S, Green C, Scott AK, Walley TJ, et al. Adverse drug  
35 reactions as cause of admission to hospital: prospective analysis of 18 820 patients. *BMJ*  
36 2004;329:15.
- 37  
38 (12) Krska J, Cromarty JA, Arris F, Jamieson D, Hansford D, Duffus PR, et al. Pharmacist-led  
39 medication review in patients over 65: a randomized, controlled trial in primary care. *Age and*  
40 *Ageing* 2001;30:205-211.
- 41  
42 (13) Department of Health. Improving patients' access to medicines: A guide to implementing  
43 nurse and pharmacist independent prescribing within the NHS England. Department of Health  
44 2006.
- 45  
46 (14) McDermott ME, Smith BH, Elliott AM, Bond CM, Hannaford P, Chambers WA. The use of  
47 medication for chronic pain in primary care, and the potential for intervention by practice-  
48 based pharmacist. *Family Practice* 2006;23:46-52.
- 49  
50 (15) Bruhn H, Bond CM, Elliott AM, Hannaford PC, Lee AJ, McNamee P, et al. Developing an RCT  
51 of general practice-based, pharmacist-led, management of chronic pain: the PIPPC study. *IJPP*  
52 2010;18(Supplement 2).
- 53  
54  
55  
56  
57  
58  
59  
60

1  
2  
3  
4  
5  
6 (16) Smith BH, Read JRM, Chambers WAC, Watt B, Grimshaw JM. Researching chronic pain:  
7 identification of a community based sample. The Pain Clinic 1996;9:73-76.

8  
9 (17) Department of Health. Supplementary prescribing by nurses and pharmacists within the  
10 NHS in England: A guide for implementation. Department of Health 2003.

11  
12 (18) Turk DC, Dworkin RH, Allen RR, Bellamy N, Brandenburg N, Carr DB, et al. Core outcome  
13 domains for chronic pain clinical trials: IMMPACT recommendations. Pain 2003 12;106(3):337-  
14 345.

15  
16 (19) Ware JE, Kosinski M, Turner-Bowker DM, Sundaram M, Gandek B, Maruish ME. User's  
17 Manual for the SF-12v2 Health Survey. Second edition ed.: QualityMetric, Incorporated, 2009;  
18 2009.

19  
20 ~~(19) The Community Pharmacy Medicines Management Project Evaluation Team. The~~  
21 ~~MEDMAN study: a randomized controlled trial of community pharmacy led medicines~~  
22 ~~management for patients with coronary heart disease. Family Practice 2007;24:189-200.~~

23  
24 ~~(1920) Von Korff M, Ormel J, Keefe FJ, Dworkin SF. Grading the severity of chronic pain. Pain~~  
25 ~~1992;50:133-149.~~

26  
27 (20) Nicholl BI, Macfarlane GJ, Davies KA, Morriss R, Dickens C, McBeth J. Premorbid  
28 psychosocial factors are associated with poor health-related quality of life in subjects with new  
29 onset of chronic widespread pain - results from the EPIFUND study. Pain 2009;141:119-126.

30  
31 ~~(2021) Ware JE, Kosinski M, Turner-Bowker DM, Sundaram M, Gandek B, Maruish ME. User's~~  
32 ~~Manual for the SF-12v2 Health Survey. Second edition ed.: QualityMetric, Incorporated, 2009;~~  
33 ~~2009.~~

34  
35 ~~(2122) Nicholl BI, Macfarlane GJ, Davies KA, Morriss R, Dickens C, McBeth J. Premorbid~~  
36 ~~psychosocial factors are associated with poor health-related quality of life in subjects with new~~  
37 ~~onset of chronic widespread pain—results from the EPIFUND study. Pain 2009;141:119-126.~~

38  
39 (21223) Carmona L, Ballina J, Gabriel R, Laffon A. The burden of musculoskeletal diseases in the  
40 general population of Spain: results from a national survey. Ann Rheum Dis 2001;60:1040-1045.

41  
42 (22) Feeny, David, "Preference-Based Measures: Utility and Quality-Adjusted Life Years,"  
43 Chapter 6.2 in Peter Fayers and Ron Hays, eds., Assessing Quality of Life in Clinical Trials,  
44 Second Edition, Oxford, Oxford University Press, 2005, pp 405-429.

45  
46 (23) Von Korff M, Ormel J, Keefe FJ, Dworkin SF. Grading the severity of chronic pain. Pain  
47 1992;50:133-149.

48  
49 ~~(2424) Zigmond AS, Snaith RP. The hospital anxiety and depression scale. Acta Psychiatr Scand~~  
50 ~~1983 Jun;67(6):361-370.~~

51  
52 (25425) Snaith RP, Zigmond AS. HADS: Hospital Anxiety and Depression Scale. Windsor: NFER  
53 Nelson; 1994.

Formatted: Font: (Default) Calibri, 12 pt

(26526) Morisky DE, Green LW, Levine DM. Concurrent and predictive validity of a self-reported measure of medication adherence. *Med Care* 1986 Jan;24(1):67-74.

(27627) Lancaster GA, Dood S, Williamson PR. Design and analysis of pilot studies: recommendations for good practice. *J Eval Clin Pract* 2004;10(2):307-312.

(287) Rosenthal R. *Meta-analytic procedures for social research (revised)*. Newbury Park, CA. Sage 1991.

(298) Cohen J. *Statistical power analysis for the behavioural sciences (2<sup>nd</sup> edition)*. New York. Academic Press.

(302928) Craig P, Dieppe P, Macintyre S, Michie S, Nazareth I, Petticrew M. Developing and evaluating complex interventions: the new Medical Research Council guidance. *BMJ* 2008;337:a1655.

(3109) Magni M, Caldieron C, Rigatti-Luchini S, Merskey H. Chronic musculo-skeletal pain and depressive symptoms in the general population. An analysis of the 1st National Health and Nutrition Examination Survey data. *Pain* 1990; 43: 299-307

(3210) Gureje O, Von Korff M, Simon GE, Gater R. Persistent pain and well-being. A World Health Organization study in primary care. *Journal of the American Medical Association* 1998; 280: 147-151.

(3322931) Community Pharmacy Medicines Management Project Evaluation Team. The MEDMAN study: a randomized controlled trial of community pharmacy-led medicines management for patients with coronary heart disease. *Family Practice* 2007;24:189-200.

(3433032) Treweek S, Mitchell E, Pitkethly M, Cook J, Kjeldstrøm M, Johansen M, et al. Strategies to improve recruitment to randomised controlled trials. *Cochrane Database Syst Rev* 2010;(4):MR000013 2011.

(3543133) Cameron IM, Cardy A, Crawford JR, du Toit Schalk W, Hay S, Lawton K, et al. Measuring depression severity in general practice: discriminatory performance of the PHQ-9, HADS-D, and BDI-II. *Br J Gen Pract* 2011;61:e419-e426(8).

(3653234) Briggs M, Closs SJ, Marczewski K, Barratt J. A feasibility study of a combined nurse/pharmacist-led chronic pain clinic in primary care. *Qual Prim Care* 2008;16:91-94.

(3763335) Anonymous. Pharmacist and physiotherapist-led community outreach pain programme improve quality of life. *The Pharmaceutical Journal* 2005;275:14.

(3873436) Turk DC, Dworkin RH, Revicki D, Harding G, Burke LB, Cella D, et al. Identifying important outcome domains for chronic pain clinical trials: An IMMPACT survey of people with pain. 2008;137:276-285.

~~Rosenthal R. *Meta-analytic procedures for social research (revised)*. Newbury Park, CA. Sage 1991.~~

Formatted: Space After: 0 pt

Formatted: Normal

Formatted: Space Before: 0 pt, After: 0 pt

Formatted: Font: Calibri, 12 pt, Not Bold, Font color: Auto

Formatted: Font: Calibri, 12 pt, Not Bold, Font color: Auto

Formatted: Font: Calibri, Not Bold, Font color: Auto

Formatted: Font: Calibri, Not Bold, Font color: Auto

1  
2  
3  
4  
5  
6  
7  
8  
9  
10  
11  
12  
13  
14  
15  
16  
17  
18  
19  
20  
21  
22  
23  
24  
25  
26  
27  
28  
29  
30  
31  
32  
33  
34  
35  
36  
37  
38  
39  
40  
41  
42  
43  
44  
45  
46  
47  
48  
49  
50  
51  
52  
53  
54  
55  
56  
57  
58  
59  
60

~~Cohen J. Statistical power analysis for the behavioural sciences (2<sup>nd</sup> edition). New York:  
Academic Press.~~

Formatted: Font: +Body (Calibri), Superscript

For peer review only

Figure 1: CONSORT Flow Diagram

1  
2  
3  
4  
5  
6  
7  
8  
9  
10  
11  
12  
13  
14  
15  
16  
17  
18  
19  
20  
21  
22  
23  
24  
25  
26  
27  
28  
29  
30  
31  
32  
33  
34  
35  
36  
37  
38  
39  
40  
41  
42  
43  
44  
45  
46  
47  
48  
49  
50  
51  
52  
53  
54  
55  
56  
57  
58  
59  
60

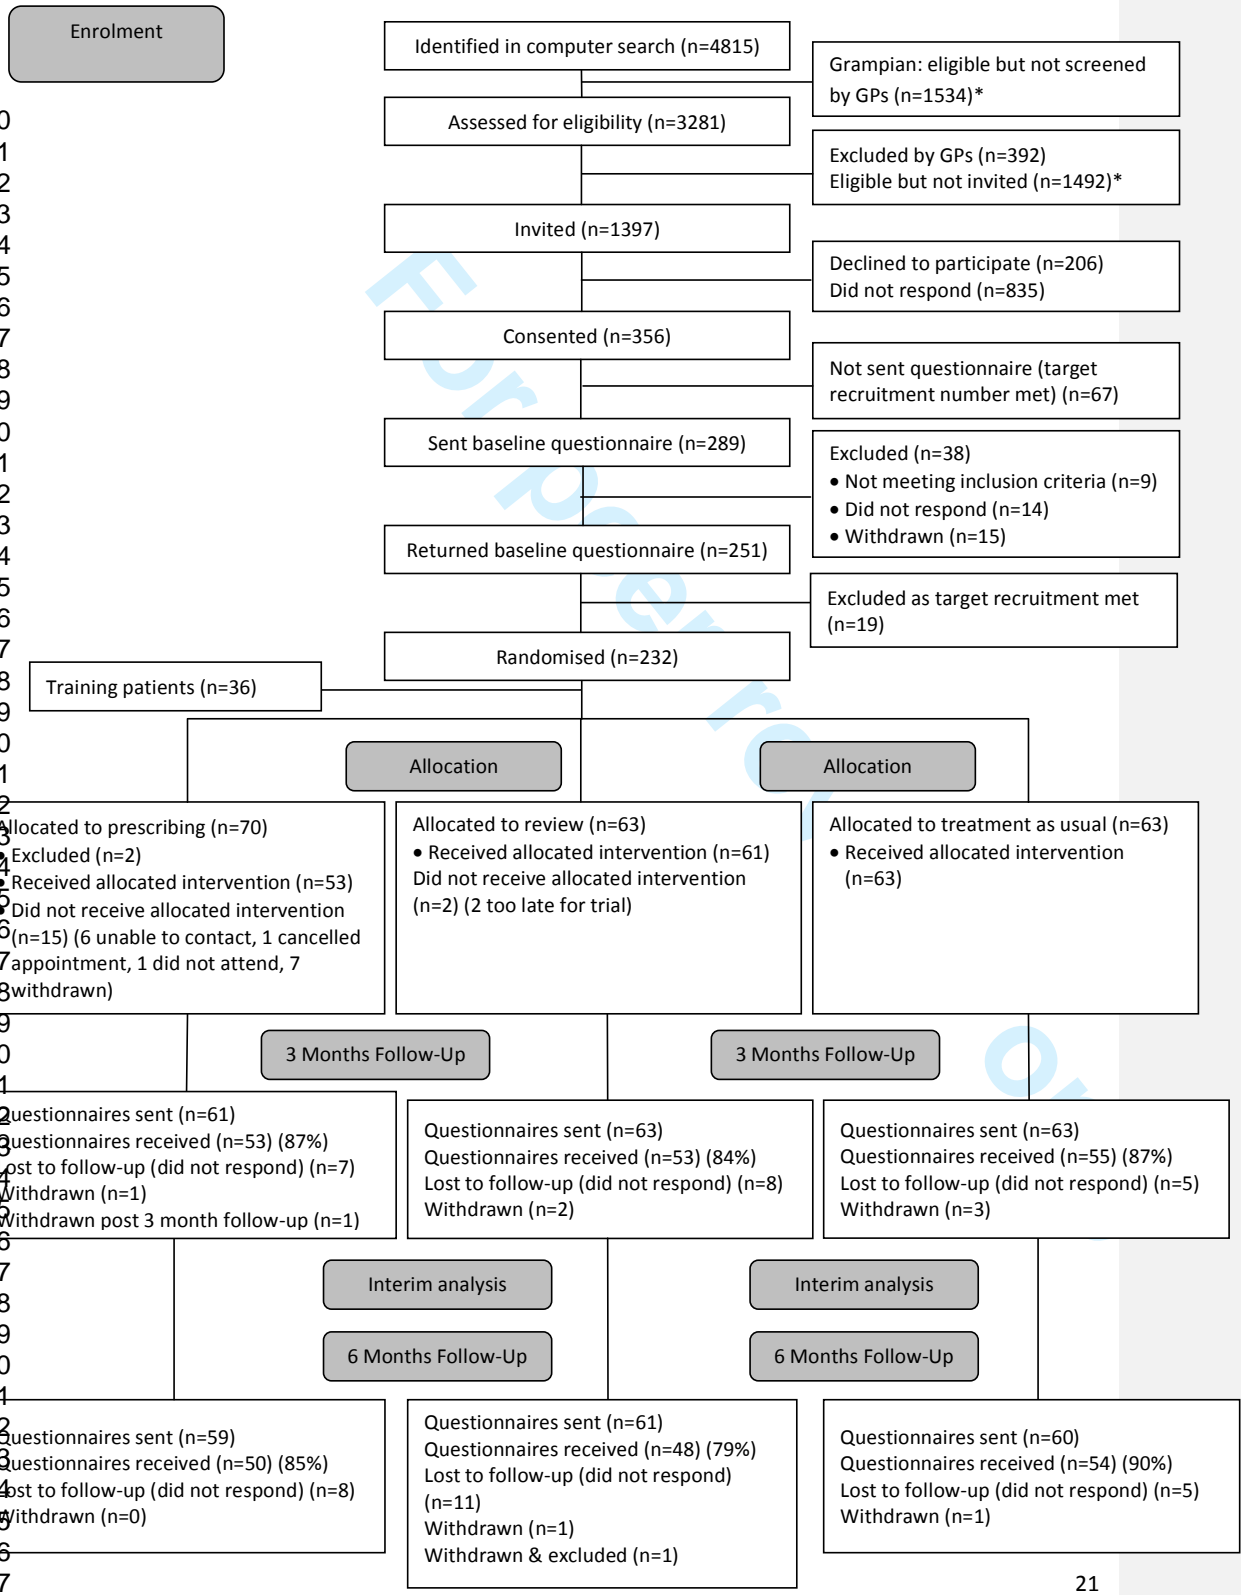

1  
2  
3  
4  
5  
6 | \*In the Grampian Health Board areaGrampian, on the basis of response rates in the earlier feasibility  
7 study (241 screened patients resulted in 22 recruited) only a random sample of eligible participants  
8 were screened (15). In East Anglia all eligible patients were screened.  
9  
10  
11  
12  
13  
14  
15  
16  
17  
18  
19  
20  
21  
22  
23  
24  
25  
26  
27  
28  
29  
30  
31  
32  
33  
34  
35  
36  
37  
38  
39  
40  
41  
42  
43  
44  
45  
46  
47  
48  
49  
50  
51  
52  
53  
54  
55  
56  
57  
58  
59  
60

For peer review only

**Table 1:** Baseline demographic, socio-economic and pain data of patients by study arm, prescribing, review and treatment as usual (TAU)

|                                           | Prescribing*<br>(n = 68) | Review*<br>(n = 62) | TAU*<br>(n = 63) |
|-------------------------------------------|--------------------------|---------------------|------------------|
| Age: mean (SD)                            | 66.1 (12.1)              | 65.7 (14.2)         | 64.9 (11.6)      |
| Missing                                   | 1                        | 1                   | 0                |
| Gender (% female)                         | 54.4 (37)                | 74.2 (46)           | 58.7 (37)        |
| <i>Marital status</i>                     |                          |                     |                  |
| Married                                   | 43                       | 30                  | 41               |
| Single                                    | 6                        | 6                   | 3                |
| Divorced/widow                            | 10                       | 21                  | 13               |
| Other                                     | 6                        | 4                   | 6                |
| Missing                                   | 3                        | 1                   | 0                |
| <i>Highest educational level achieved</i> |                          |                     |                  |
| No qualifications                         | 30                       | 27                  | 21               |
| O grade or equivalent                     | 12                       | 6                   | 14               |
| Higher/A-level/NVQ3/SVQ3                  | 6                        | 8                   | 7                |
| Tertiary education/NVQ4/NVQ5              | 18                       | 17                  | 14               |
| Other                                     | 2                        | 1                   | 4                |
| Missing                                   | 0                        | 3                   | 3                |
| <i>Employment status</i>                  |                          |                     |                  |
| Employed                                  | 16                       | 14                  | 9                |
| Unemployed                                | 3                        | 5                   | 1                |
| Retired                                   | 38                       | 35                  | 34               |
| Long term sick/disabled                   | 7                        | 5                   | 9                |
| Other                                     | 3                        | 2                   | 7                |
| Missing                                   | 1                        | 1                   | 3                |
| <i>Household annual income before tax</i> |                          |                     |                  |
| Less than £9,999                          | 13                       | 15                  | 10               |
| £10,000 - £14,999                         | 14                       | 18                  | 22               |
| £15,000 - £24,999                         | 14                       | 12                  | 12               |
| £25,000 – or more                         | 22                       | 11                  | 8                |
| Missing                                   | 5                        | 6                   | 11               |
| <i>Ethnic group</i>                       |                          |                     |                  |
| Caucasian                                 | 67                       | 62                  | 61               |
| Other                                     | 1                        |                     |                  |
| Missing                                   | 0                        | 0                   | 2                |
| <i>Pain duration</i>                      |                          |                     |                  |
| < 1 year                                  | 3                        | 2                   | 4                |
| 1 – 3 years                               | 12                       | 12                  | 7                |
| 3 – 5 years                               | 10                       | 13                  | 9                |
| 5 – 10 years                              | 17                       | 13                  | 15               |
| > 10 years                                | 26                       | 22                  | 28               |
| <i>Pain localisation (% , n)</i>          |                          |                     |                  |
| Back                                      | 27.9 (19)                | 32.3 (20)           | 20.6 (13)        |
| Neck, shoulders                           | 7.4 (5)                  | 9.7 (6)             | 9.5 (6)          |
| Limbs or hips                             | 42.6 (29)                | 30.6 (19)           | 50.8 (32)        |
| Other                                     | 8.8 (6)                  | 4.8 (3)             | 7.9 (5)          |
| Missing                                   | 9                        | 14                  | 7                |

\*Denominator based on numbers allocated to the specific arms, minus any exclusions due to protocol violations.

**Table 2:** Mean (standard deviation, SD) CPG intensity , median (interquartile range, IQR) CPG disability, and count CPG grade at baseline, 6 months follow-up and difference between the two assessment points for each arm, prescribing, review and treatment as usual (TAU). P-values for within and between arm differences are also reported.

|                                   | Prescribing |                   | Review |                    | TAU |                   | P (between groups <sup>***</sup> ) |
|-----------------------------------|-------------|-------------------|--------|--------------------|-----|-------------------|------------------------------------|
|                                   | n*          | Mean (SD)         | n*     | Mean (SD)          | n*  | Mean (SD)         |                                    |
| Baseline CPG intensity            | 47          | 66.1 (16.0)       | 45     | 68.4 (17.6)        | 54  | 65.4 (18.0)       |                                    |
| 6 month follow-up CPG intensity   |             | 58.1 (19.5)       |        | 67.4 (21.7)        |     | 65.6 (19.6)       |                                    |
| Difference CPG intensity          |             | -8.0 (16.3)       |        | -1.0 (16.0)        |     | 0.2 (14.9)        | <b>0.02</b>                        |
| P (within groups <sup>**</sup> )  |             | 0.002             |        | 0.67               |     | 0.93              | <b>0.02</b>                        |
| Effect size (r)                   |             | <b>0.45x</b>      |        | <b>0.07x</b>       |     | <b>0.01x</b>      |                                    |
|                                   |             | Median [IQR]      |        | Median [IQR]       |     | Median [IQR]      |                                    |
| Baseline CPG disability           | 48          | 60.0 [30.0; 75.8] | 46     | 66.7 [45.0; 80.0]  | 53  | 56.7 [36.7; 80.0] |                                    |
| 6 Month follow-up CPG disability  |             | 40.0 [20.0; 60.0] |        | 53.3 [29.2; 73.3]  |     | 50.0 [25.0; 80.0] |                                    |
| Difference CPG disability         |             | -8.3 [-23.3; 0.0] |        | -3.3 [-16.7; 10.0] |     | -3.3 [-21.7; 5.0] | <b>0.55</b>                        |
| P (within groups <sup>**</sup> )  |             | 0.003             |        | 0.15               |     | 0.05              | <b>0.55</b>                        |
| Effect size (r)                   |             | <b>0.43x</b>      |        | <b>0.20x</b>       |     | <b>0.26x</b>      |                                    |
| Baseline CPG grade                | 44          | Count (%)         | 44     | Count (%)          | 48  | Count (%)         |                                    |
|                                   | I           | 5 (11.4)          |        | 3 (6.8)            |     | 5 (10.4)          |                                    |
|                                   | II          | 16 (36.4)         |        | 9 (20.5)           |     | 13 (27.1)         |                                    |
|                                   | III         | 7 (15.9)          |        | 10 (22.7)          |     | 13 (27.1)         |                                    |
|                                   | VI          | 16 (36.4)         |        | 22 (50.0)          |     | 17 (35.4)         |                                    |
| 6 month follow-up CPG grade       |             |                   |        |                    |     |                   |                                    |
|                                   | I           | 13 (29.5)         |        | 8 (18.2)           |     | 6 (12.5)          |                                    |
|                                   | II          | 13 (29.5)         |        | 15 (34.1)          |     | 17 (35.4)         |                                    |
|                                   | III         | 8 (18.2)          |        | 8 (18.2)           |     | 11 (22.9)         |                                    |
|                                   | IV          | 10 (22.7)         |        | 13 (29.5)          |     | 14 (29.2)         |                                    |
| Difference CPG grade              |             |                   |        |                    |     |                   |                                    |
|                                   | ≤-1         | 21 (47.7)         |        | 17 (38.6)          |     | 15 (31.2)         |                                    |
|                                   | 0           | 17 (38.6)         |        | 25 (56.8)          |     | 25 (52.1)         |                                    |
|                                   | ≥1          | 6 (13.6)          |        | 2 (4.5)            |     | 8 (2.1)           | 0.16                               |
| P (within groups <sup>***</sup> ) |             | 0.003             |        | 0.001              |     | 0.17              |                                    |

\*Number of participants in each group who completed the appropriate part of the CPG at both baseline and follow-up.

\*\* From paired t-test, Wilcoxon signed rank test or marginal homogeneity test as appropriate

\*\*\* From ANOVA on mean difference, Kruskal-Wallis on median difference or chi-squared test on difference in CPG grade as appropriate



**Table 3:** Mean (standard deviation, SD) SF12 Physical Component Score (PCS) and median (interquartile range, IQR) Mental Component Score (MCS) at baseline and 6 month follow-up and difference between the two assessment points for each arm, prescribing, review and treatment as usual (TAU). Within and between arm p-values are also reported.

|                                  | Prescribing |                   | Review |                   | TAU |                   | P (between groups <sup>***</sup> ) |
|----------------------------------|-------------|-------------------|--------|-------------------|-----|-------------------|------------------------------------|
|                                  | n*          | Mean (SD)         | n*     | Mean (SD)         | n*  | Mean (SD)         |                                    |
| Baseline SF12 PCS                | 41          | 33.5 (10.8)       | 43     | 32.59(11.38)      | 45  | 29.60 (9.71)      |                                    |
| 6 month follow-up SF12 PCS       |             | 35.3 (10.8)       |        | 34.62 (11.26)     |     | 32.59 (9.14)      |                                    |
| Difference SF12 PCS              |             | 1.8 (7.5)         |        | 2.02 (7.56)       |     | 2.99 (8.11)       | <b>0.75</b>                        |
| P (within groups <sup>**</sup> ) |             | 0.12              |        | 0.09              |     | 0.02              | <b>0.75</b>                        |
| Effect size (r)                  |             | <u>0.24x</u>      |        | <u>0.26x</u>      |     | <u>0.35x</u>      |                                    |
|                                  |             | Median [IQR]      |        | Median (IQR)      | 45  | Median (IQR)      |                                    |
| Baseline SF12 MCS                | 42          | 52.4 [42.0; 58.8] | 43     | 47.9 [38.5; 59.9] |     | 51.5 [41.3; 60.7] |                                    |
| 6 month follow-up SF12 MCS       |             | 49.6 [42.8; 58.1] |        | 47.9 [38.9; 56.2] |     | 44.7 [37.6; 55.8] |                                    |
| Difference SF12 MCS              |             | -0.4 [-3.7; 6.0]  |        | -1.2 [-6.6; 4.2]  |     | -3.0 [-10.0; 1.3] | <b>0.04</b>                        |
| P (within groups <sup>**</sup> ) |             | 0.64              |        | 0.37              |     | 0.002             | <b>0.04</b>                        |
| Effect size (r)                  |             | <u>0.07x</u>      |        | <u>0.14x</u>      |     | <u>0.46x</u>      |                                    |

\* Number of participants in each group who completed the appropriate part of the SF-12 at both baseline and follow-up.

\*\* From paired t-test or Wilcoxon signed rank test as appropriate

\*\*\* From ANOVA on mean difference or Kruskal-Wallis test on median difference as appropriate

**Table 4:** The HADS-Depression (HADS-D) and HADS-Anxiety (HADS-A) count of patients according to severity (normal, mild, moderate or severe) and the difference in severity category between the two assessment points for each arm, prescribing, review and treatment as usual (TAU). Within and between arm p-values are also reported.\*

|                                  | n  | Prescribing | n  | Review    | n  | TAU       | P (between groups <sup>***</sup> ) |
|----------------------------------|----|-------------|----|-----------|----|-----------|------------------------------------|
| Baseline HADS-D                  | 44 | Count (%)   | 45 | Count (%) | 53 | Count (%) |                                    |
| Normal                           |    | 32 (72.7)   |    | 31 (68.9) |    | 38 (71.7) |                                    |
| Mild                             |    | 8 (18.2)    |    | 11 (24.4) |    | 7 (13.2)  |                                    |
| Moderate                         |    | 3 (6.8)     |    | 3 (6.7)   |    | 8 (15.1)  |                                    |
| Severe                           |    | 1 (2.3)     |    | 0         |    | 0         |                                    |
| 6 month follow-up HADS-D         |    |             |    |           |    |           |                                    |
| Normal                           |    | 32 (72.7)   |    | 32 (71.1) |    | 32 (60.4) |                                    |
| Mild                             |    | 7 (15.9)    |    | 6 (13.3)  |    | 10 (18.9) |                                    |
| Moderate                         |    | 5 (11.4)    |    | 6 (13.3)  |    | 8 (15.1)  |                                    |
| Severe                           |    | 0           |    | 1 (2.2)   |    | 3 (5.7)   |                                    |
| Difference HADS-D                |    |             |    |           |    |           |                                    |
| ≤-1                              |    | 5 (11.4)    |    | 4 (8.9)   |    | 2 (3.8)   |                                    |
| 0                                |    | 34 (77.3)   |    | 37 (82.0) |    | 40 (75.5) |                                    |
| ≥1                               |    | 5 (11.4)    |    | 4 (8.9)   |    | 11 (20.8) | 0.32 <sup>Net valid**</sup>        |
| P (within groups <sup>**</sup> ) |    | 1.0         |    | 0.71      |    | 0.03      |                                    |
| Baseline HADS-A                  | 44 | Count (%)   | 43 | Count (%) | 48 | Count (%) |                                    |
| Normal                           |    | 25 (56.8)   |    | 30 (69.8) |    | 29 (60.4) |                                    |
| Mild                             |    | 8 (18.2)    |    | 7 (16.3)  |    | 9 (18.8)  |                                    |
| Moderate                         |    | 8 (18.2)    |    | 5 (11.6)  |    | 8 (16.7)  |                                    |
| Severe                           |    | 3 (6.8)     |    | 1 (2.3)   |    | 2 (4.2)   |                                    |
| 6 month follow-up HADS-A         |    |             |    |           |    |           |                                    |
| Normal                           |    | 27 (61.4)   |    | 29 (67.4) |    | 32 (66.7) |                                    |
| Mild                             |    | 7 (15.9)    |    | 6 (14.0)  |    | 5 (10.4)  |                                    |
| Moderate                         |    | 8 (18.2)    |    | 6 (14.0)  |    | 10 (20.8) |                                    |
| Severe                           |    | 2 (4.5)     |    | 2 (4.7)   |    | 1 (2.1)   |                                    |
| Difference HADS-A                |    |             |    |           |    |           |                                    |
| ≤-1                              |    | 6 (13.6)    |    | 3 (7.0)   |    | 10 (20.8) |                                    |
| 0                                |    | 35 (79.5)   |    | 33 (76.7) |    | 29 (60.4) |                                    |
| ≥1                               |    | 3 (6.8)     |    | 7 (16.3)  |    | 9 (18.8)  | 0.14                               |
| P (within groups <sup>**</sup> ) |    | 0.25        |    | 0.21      |    | 0.55      |                                    |

\* Number of participants in each group who completed the appropriate part of the HADS at both baseline and follow-up.

**\*\* Between arms p-value not valid due to low numbers in multiple cells, even after collapsing to the**

**\*\* From marginal homogeneity test**

**\*\*\* From chi-squared test on difference in HADS**

1  
2  
3  
4  
5  
6  
7  
8  
9  
10  
11  
12  
13  
14  
15  
16  
17  
18  
19  
20  
21  
22  
23  
24  
25  
26  
27  
28  
29  
30  
31  
32  
33  
34  
35  
36  
37  
38  
39  
40  
41  
42  
43  
44  
45  
46  
47  
48  
49  
50  
51  
52  
53  
54  
55  
56  
57  
58  
59  
60

ree categories.

For peer review only

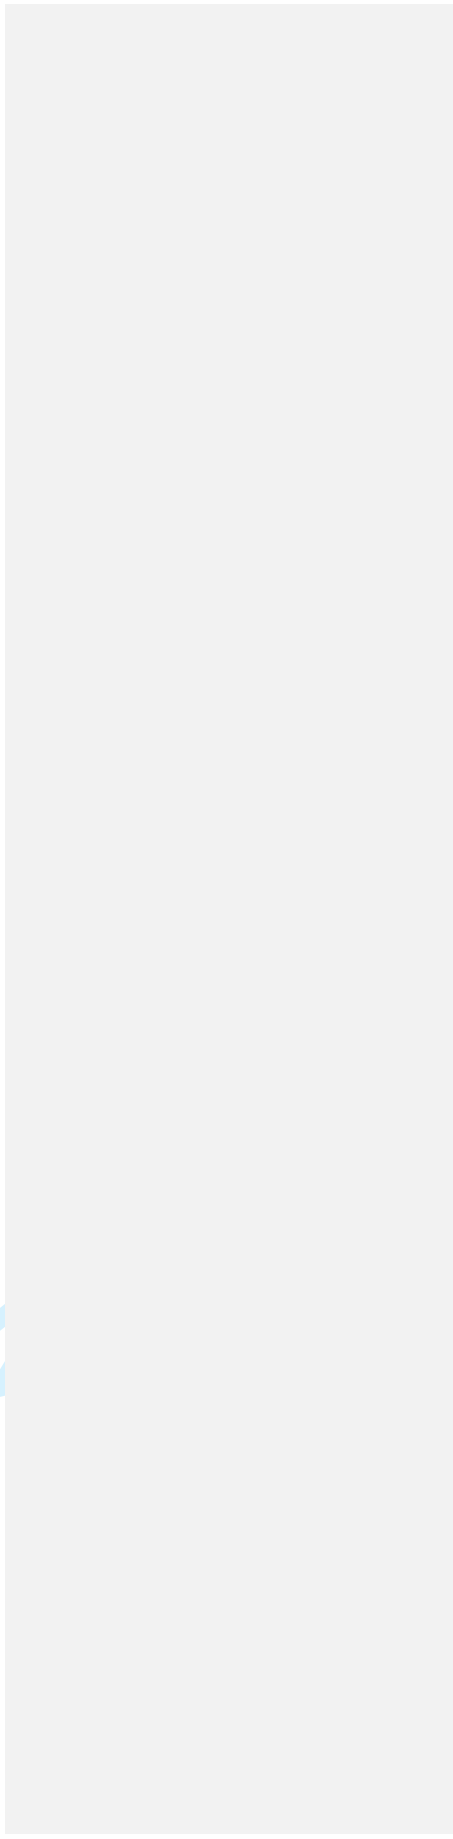

**Table 5:** Median HADS-Depression (HADS-D) and HADS-Anxiety (HADS-A) scores (interquartile range, IQR) at baseline and 6 month follow-up and difference between the two assessment point for each arm, prescribing, review and treatment as usual (TAU). Within and between arm p-values are also reported.

|                          | Prescribing |                  | Review |                 | TAU |                 | P (between groups) |
|--------------------------|-------------|------------------|--------|-----------------|-----|-----------------|--------------------|
|                          | n           | Median [IQR]     | n      | Median [IQR]    | n   | Median [IQR]    |                    |
| Baseline HADS-D          | 42          | 5.0 [3.0; 8.0]   | 44     | 4.5 [2.3; 8.0]  | 51  | 5.0 [3.0; 8.0]  | 0.02               |
| 6 month follow-up HADS-D |             | 4.0 [2.0; 8.0]   |        | 5.0 [2.0; 8.8]  |     | 5.0 [2.0; 10.0] |                    |
| Difference HADS-D        |             | -1.0 [-2.0; 0.0] |        | 0.0 [-1.0; 1.8] |     | 0.0 [-1.0; 2.0] |                    |
| P (within groups)        |             | 0.02             |        | 0.33            |     | 0.22            |                    |
| Baseline HADS-A          | 44          | 7.0 [3.3; 10.8]  | 43     | 5.0 [3.0; 10.0] | 48  | 6.0 [4.0; 10.0] | 0.05               |
| 6 month follow-up HADS-A |             | 5.0 [2.3; 9.8]   |        | 6.0 [3.0; 9.0]  |     | 7.0 [4.0; 10.0] |                    |
| Difference HADS-A        |             | -1.0 [-2.0; 0.0] |        | 0.0 [-2.0; 2.0] |     | 0.5 [-3.0; 2.0] |                    |
| P (within groups)        |             | 0.01             |        | 0.45            |     | 0.81            |                    |

\* Number of participants in each group who completed the appropriate part of the HADS at both baseline and follow-up.

Box 1 Examples of pharmacist interventions in the prescribing arm

**Changes to pain management:** 'use paracetamol regularly', 'take tramadol if needed' 'add piroxicam gel PRN', 'given web links to self help groups'

**Compliance aid:** 'gave written times that this drug could be taken'

**Addressing side effects/safety:** 'take paracetamol after initial NSAID', 'take senna', 'ordered blood monitoring', 'stop use of two NSAIDS'

**General health:** 'discussed weight loss', 'invited to practice nurse for BP', 'glucose, lipids and lifestyle update',

**Cost minimisation:** 'change aspirin EC to plain',

BOX 2 Examples of quotes from Pharmacists (n=6), GPs (n=23) and patient participants (n=40) on the prescribing intervention

**Pharmacists (from interviews):**

**Satisfying** (n=6): 'contact with patients', 'being able to help patients', 'being able to make a difference to long-standing pain'...'even in small ways'

**Interesting** (n=6): 'learning about pain'

**Challenging** (n=6): 'complex, chronically ill patients'

**GPs (from interviews):**

**Support for the service** (n=17): 'it's been a very positive thing'

**Agreement with pharmacists' recommendations** (n=23): 'oh very reasonable suggestions', 'tinkering round the edges', 'had been tried already'.

**Trust in the practice pharmacist** (n=23): 'I respect his professional judgement'

**Cost effectiveness** (n=6): 'if there's limited resources do we want to spend the money on a pharmacist'.

**Patients (from 3 month questionnaire):**

**Closed questions:**

Proportion agreeing that:

The pharmacist was interested in them (89%; 39/44)

They were totally satisfied (85%; 39/46)

They were told about their treatment (82%; 38/46)

Their consultation was thorough (79%; 34/44)

They would have liked more time (9%; 4/44)

They would have preferred to see their GP (9%; 4/44)

Too many people were now involved in their treatment (11%; 5/44).

**Open text questions:**

Positive (n=39): 'She was professional, relaxed, pleasant and interested. Excellent!'

Negative (n=1): 'A waste of time, altered my tablets which made my pain worse'.



## CONSORT 2010 checklist of information to include when reporting a randomised trial\*

| Section/Topic                    | Item No | Checklist item                                                                                                                                                                              | Reported on page No |
|----------------------------------|---------|---------------------------------------------------------------------------------------------------------------------------------------------------------------------------------------------|---------------------|
| <b>Title and abstract</b>        |         |                                                                                                                                                                                             |                     |
|                                  | 1a      | Identification as a randomised trial in the title                                                                                                                                           | 1                   |
|                                  | 1b      | Structured summary of trial design, methods, results, and conclusions (for specific guidance see CONSORT for abstracts)                                                                     | 3-4                 |
| <b>Introduction</b>              |         |                                                                                                                                                                                             |                     |
| Background and objectives        | 2a      | Scientific background and explanation of rationale                                                                                                                                          | 5                   |
|                                  | 2b      | Specific objectives or hypotheses                                                                                                                                                           | 5-6                 |
| <b>Methods</b>                   |         |                                                                                                                                                                                             |                     |
| Trial design                     | 3a      | Description of trial design (such as parallel, factorial) including allocation ratio                                                                                                        | 6                   |
|                                  | 3b      | Important changes to methods after trial commencement (such as eligibility criteria), with reasons                                                                                          | N/A                 |
| Participants                     | 4a      | Eligibility criteria for participants                                                                                                                                                       | 6                   |
|                                  | 4b      | Settings and locations where the data were collected                                                                                                                                        | 6                   |
| Interventions                    | 5       | The interventions for each group with sufficient details to allow replication, including how and when they were actually administered                                                       | 7-8                 |
| Outcomes                         | 6a      | Completely defined pre-specified primary and secondary outcome measures, including how and when they were assessed                                                                          | 8                   |
|                                  | 6b      | Any changes to trial outcomes after the trial commenced, with reasons                                                                                                                       | N/A                 |
| Sample size                      | 7a      | How sample size was determined                                                                                                                                                              | 9                   |
|                                  | 7b      | When applicable, explanation of any interim analyses and stopping guidelines                                                                                                                | N/A                 |
| Randomisation:                   |         |                                                                                                                                                                                             |                     |
| Sequence generation              | 8a      | Method used to generate the random allocation sequence                                                                                                                                      | 7                   |
|                                  | 8b      | Type of randomisation; details of any restriction (such as blocking and block size)                                                                                                         | N/A                 |
| Allocation concealment mechanism | 9       | Mechanism used to implement the random allocation sequence (such as sequentially numbered containers), describing any steps taken to conceal the sequence until interventions were assigned | 7                   |
| Implementation                   | 10      | Who generated the random allocation sequence, who enrolled participants, and who assigned participants to interventions                                                                     | 7                   |
| Blinding                         | 11a     | If done, who was blinded after assignment to interventions (for example, participants, care providers, those                                                                                | N/A                 |

|                                                      |     |                                                                                                                                                   |                                                        |
|------------------------------------------------------|-----|---------------------------------------------------------------------------------------------------------------------------------------------------|--------------------------------------------------------|
|                                                      |     | assessing outcomes) and how                                                                                                                       |                                                        |
|                                                      | 11b | If relevant, description of the similarity of interventions                                                                                       | N/A                                                    |
| Statistical methods                                  | 12a | Statistical methods used to compare groups for primary and secondary outcomes                                                                     | 9                                                      |
|                                                      | 12b | Methods for additional analyses, such as subgroup analyses and adjusted analyses                                                                  | N/A                                                    |
| <b>Results</b>                                       |     |                                                                                                                                                   |                                                        |
| Participant flow (a diagram is strongly recommended) | 13a | For each group, the numbers of participants who were randomly assigned, received intended treatment, and were analysed for the primary outcome    | 10, figure 1(p.18)                                     |
|                                                      | 13b | For each group, losses and exclusions after randomisation, together with reasons                                                                  | 10, figure 1(p.18)                                     |
| Recruitment                                          | 14a | Dates defining the periods of recruitment and follow-up                                                                                           | 7-8                                                    |
|                                                      | 14b | Why the trial ended or was stopped                                                                                                                | N/A                                                    |
| Baseline data                                        | 15  | A table showing baseline demographic and clinical characteristics for each group                                                                  | 10, Table 1 (p20)                                      |
| Numbers analysed                                     | 16  | For each group, number of participants (denominator) included in each analysis and whether the analysis was by original assigned groups           | See Tables 2,3,4,5 and page 9 (ITT)                    |
| Outcomes and estimation                              | 17a | For each primary and secondary outcome, results for each group, and the estimated effect size and its precision (such as 95% confidence interval) | See pages 10/11, and Tables 2,3,4,5. P values reported |
|                                                      | 17b | For binary outcomes, presentation of both absolute and relative effect sizes is recommended                                                       | N/A                                                    |
| Ancillary analyses                                   | 18  | Results of any other analyses performed, including subgroup analyses and adjusted analyses, distinguishing pre-specified from exploratory         | N/A                                                    |
| Harms                                                | 19  | All important harms or unintended effects in each group (for specific guidance see CONSORT for harms)                                             | N/A                                                    |
| <b>Discussion</b>                                    |     |                                                                                                                                                   |                                                        |
| Limitations                                          | 20  | Trial limitations, addressing sources of potential bias, imprecision, and, if relevant, multiplicity of analyses                                  | 12                                                     |
| Generalisability                                     | 21  | Generalisability (external validity, applicability) of the trial findings                                                                         | 12-13                                                  |
| Interpretation                                       | 22  | Interpretation consistent with results, balancing benefits and harms, and considering other relevant evidence                                     | 13                                                     |
| <b>Other information</b>                             |     |                                                                                                                                                   |                                                        |
| Registration                                         | 23  | Registration number and name of trial registry                                                                                                    | 4                                                      |



1  
2  
3  
4  
5  
6  
7  
8  
9  
10  
11  
12  
13  
14  
15  
16  
17  
18  
19  
20  
21  
22  
23  
24  
25  
26  
27  
28  
29  
30  
31  
32  
33  
34  
35  
36  
37  
38  
39  
40  
41  
42  
43  
44  
45  
46  
47  
48  
49

|          |    |                                                                                 |     |
|----------|----|---------------------------------------------------------------------------------|-----|
| Protocol | 24 | Where the full trial protocol can be accessed, if available                     | N/A |
| Funding  | 25 | Sources of funding and other support (such as supply of drugs), role of funders | 14  |

\*We strongly recommend reading this statement in conjunction with the CONSORT 2010 Explanation and Elaboration for important clarifications on all the items. If relevant, we also recommend reading CONSORT extensions for cluster randomised trials, non-inferiority and equivalence trials, non-pharmacological treatments, herbal interventions, and pragmatic trials. Additional extensions are forthcoming: for those and for up to date references relevant to this checklist, see [www.consort-statement.org](http://www.consort-statement.org).

For peer review only
